# Supplementary material
Source: PubMed Central journal article supplement (PMC6604859)
Supplement: NIHMS1019220-supplement-Supp_info.pdf [file NIHMS1019220-supplement-Supp_info.pdf]

## Table of Contents

|                                                                                 |                 |
|---------------------------------------------------------------------------------|-----------------|
| <b>1. General Information</b>                                                   | <b>S2</b>       |
| <b>2. Experimental Procedure and Characterization Data</b>                      | <b>S3–S22</b>   |
| <b>3. Synthesis of the Ir–H Complex <b>7</b> and the X-Ray Data of <b>7</b></b> | <b>S22–S23</b>  |
| <b>4. Deuterium experiments</b>                                                 | <b>S24</b>      |
| <b>5. Enantioselective reaction</b>                                             | <b>S25–S26</b>  |
| <b>6. NMR Spectra</b>                                                           | <b>S27–S58</b>  |
| <b>7. Density Functional Theory (DFT) Study</b>                                 | <b>S59–S144</b> |
| <b>8. References</b>                                                            | <b>S145</b>     |

## 1. General Information

Unless otherwise noted, all solvents were dried by filtration through a Pure-Solv MD-5 Solvent Purification System (Innovative Technology). Toluene and 2-methyltetrahydrofuran (MeTHF) used for the key reactions were distilled freshly over sodium and carefully freeze-pump-thawed. Cyclopentanone used for the key reactions was fractionally distilled and carefully freeze-pump-thawed. 1-octene used for the key reactions was distilled freshly over calcium hydride and carefully freeze-pump-thawed. All the key reactions were carried out under nitrogen atmosphere with a stir bar in a sealed vial. Reaction temperatures were reported as the temperatures of the bath surrounding the vials. Sensitive ligands and metal catalysts and solvents were transferred under nitrogen into a nitrogen-filled glovebox with standard techniques. Analytical thin-layer chromatography (TLC) was carried out using 0.2 mm commercial silica gel plates (silica gel 60, F254, EMD chemical). Vials [15 x 45 mm 1 dram (4 mL) with PTFE lined cap attached] were purchased from Qorpak and flame-dried and cooled in a desiccator before use. High-resolution mass spectra were recorded on an Agilent 6530 LC Q-TOF mass spectrometer using electrospray ionization with fragmentation voltage set at 115 V and processed with an Agilent MassHunter Operating System. Infrared spectra were recorded on a Nicolet 380 FTIR using neat thin film technique. Nuclear magnetic resonance spectra ( $^1\text{H}$  NMR and  $^{13}\text{C}$  NMR) were recorded with Bruker Model DMX 500 (500 MHz,  $^1\text{H}$  at 500 MHz,  $^{13}\text{C}$  at 126 MHz) or Bruker Model DMX 400 (400 MHz,  $^1\text{H}$  at 400 MHz,  $^{13}\text{C}$  at 101 MHz). Unless otherwise noted, all spectrums were acquired in  $\text{CDCl}_3$ . Chemical shifts are reported in parts per million (ppm,  $\delta$ ), downfield from tetramethylsilane (TMS,  $\delta = 0.00$  ppm) and are referenced to residual solvent ( $\text{CDCl}_3$ ,  $\delta = 7.26$  ppm ( $^1\text{H}$ ) and 77.00 ppm ( $^{13}\text{C}$ )). Coupling constants were reported in Hertz (Hz). Data for  $^1\text{H}$  NMR spectra were reported as follows: chemical shift (ppm, referenced to protium, s = singlet, d = doublet, t = triplet, q = quartet, quin = quintet, dd = doublet of doublets, td = triplet of doublets, ddd = doublet of doublet of doublets, m = multiplet, coupling constant (Hz), and integration). 2,2-Dimethyl-2,3-dihydro-1H-pyrrolo[2,3-b]pyridine (**L4**),<sup>1</sup> 3,4-dihydro-2H-pyrido[3,2-b][1,4]oxazine (**L7**),<sup>2</sup> Hex-5-en-1-ylbenzene (**2g**)<sup>3</sup> and 8-methylnona-1,7-diene (**2h**)<sup>4</sup> were synthesized by following literature procedures. 10-Methoxydec-1-ene (**2i**),<sup>5</sup> (dec-9-en-1-yloxy)triisopropylsilane (**2j**),<sup>6</sup> dec-9-en-1-yl acetate (**2k**)<sup>7</sup> and 2-(dec-9-en-1-yl)isoindoline-1,3-dione (**2m**)<sup>8</sup> were synthesized from dec-9-en-1-ol by following literature procedures. 3,3-Dimethylcyclopentan-1-one was synthesized from 3-methylcyclopent-2-en-1-one by following literature procedure.<sup>9</sup> 1-(1H-inden-2-yl)-2,3-dihydro-1H-pyrrolo[2,3-b]pyridine (**5**) was synthesized from 2-

indanone and 7-azaindoline by following literature procedure.<sup>1</sup> All other materials were obtained from commercial sources and were used as received.

## 2. Experimental Procedure and Characterization Data

**Table S1:** Optimization study for the Ir(I)-catalyzed direct  $\alpha$ -alkylation of cyclopentanone with 1-octene<sup>[a]</sup>

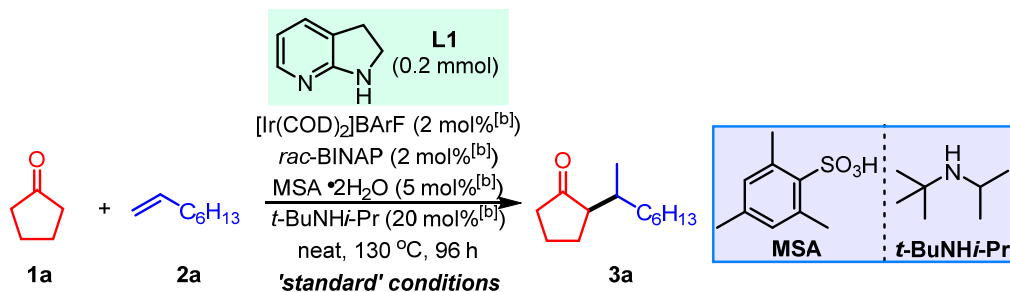

| entry | variations from the 'standard' conditions                              | TON of [Ir] <sup>[c]</sup> | d.r. of <b>3a</b> <sup>[d]</sup> | branched/li near <sup>[e]</sup> |
|-------|------------------------------------------------------------------------|----------------------------|----------------------------------|---------------------------------|
| 1     | None                                                                   | 43 (40)                    | 1.3:1                            | > 20:1                          |
| 2     | without <b>L1</b>                                                      | < 1                        | --                               | --                              |
| 3     | <b>L2-L7</b> instead of <b>L1</b>                                      |                            | listed below                     |                                 |
| 4     | without MSA $\cdot$ 2H <sub>2</sub> O                                  | 26                         | 1.4:1                            | > 20:1                          |
| 5     | TsOH $\cdot$ H <sub>2</sub> O instead of MSA $\cdot$ 2H <sub>2</sub> O | 33                         | 1.3:1                            | > 20:1                          |
| 6     | MsOH instead of MSA $\cdot$ 2H <sub>2</sub> O                          | 36                         | 1.3:1                            | > 20:1                          |
| 7     | PPTS instead of MSA $\cdot$ 2H <sub>2</sub> O                          | 35                         | 1.3:1                            | > 20:1                          |
| 8     | without t-BuNHt-Pr                                                     | 33                         | 1.3:1                            | > 20:1                          |
| 9     | tol-BINAP instead of BINAP                                             | 33                         | 1.3:1                            | > 20:1                          |
| 10    | xyl-BINAP instead of BINAP                                             | 18                         | 1.3:1                            | > 20:1                          |
| 11    | p-CF <sub>3</sub> -BINAP instead of BINAP                              | 13                         | 1.3:1                            | > 20:1                          |
| 12    | BIPHEP instead of BINAP                                                | 22                         | 1.3:1                            | > 20:1                          |
| 13    | dppf instead of BINAP                                                  | 3                          | 1.4:1                            | 2:1                             |
| 14    | dppb instead of BINAP                                                  | 6                          | 1.3:1                            | 11:1                            |
| 15    | DIOP instead of BINAP                                                  | 8                          | 1.3:1                            | 17:1                            |
| 16    | [Rh(COD) <sub>2</sub> ]BARf instead of [Ir(COD) <sub>2</sub> ]BARf     | < 1                        | --                               | --                              |

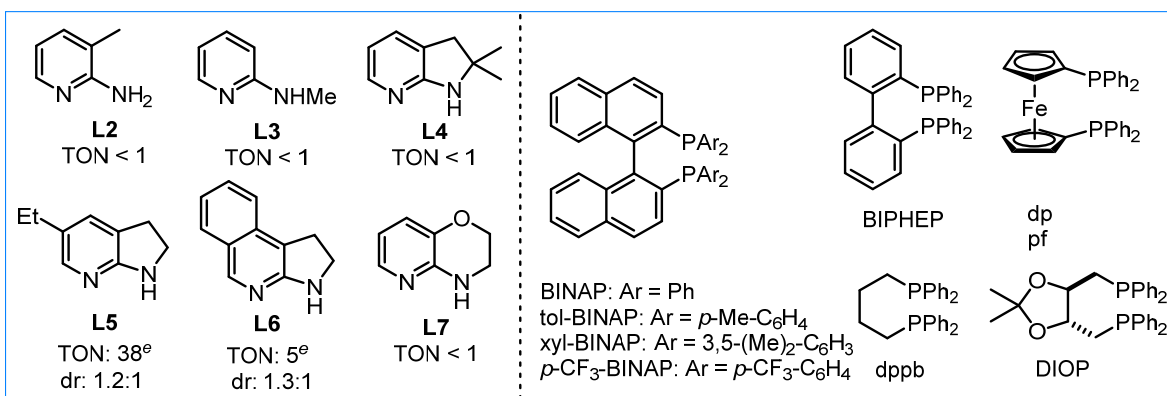

[a] Run with 0.2 mmol of **L1**, 0.5 mL of cyclopentanone and 0.5 mL of 1-octene. [b] Based on **L1**. [c] TON determined by GC using dodecane as the internal standard; value in parentheses is based on isolated products. [d] Determined by GC. d.r.= diastereomeric ratio. [e] Branched/linear > 20:1.

### General procedure A: Ir(I)-catalyzed $\alpha$ -alkylation of cyclopentanone using 1-octene:

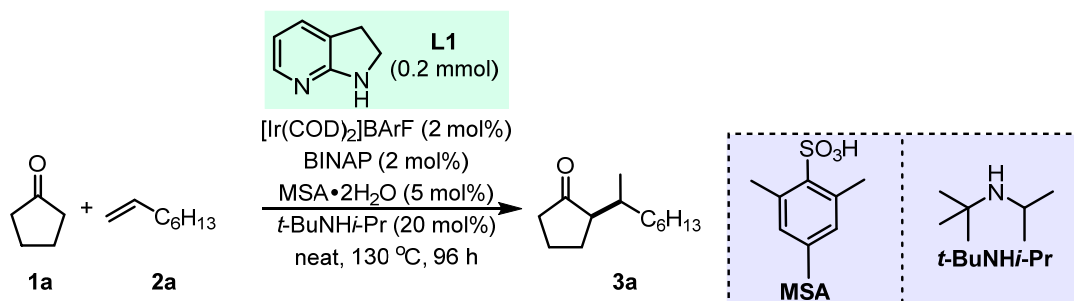

A 4-mL vial charged with a stir bar and *rac*-BINAP (2.5 mg, 0.004 mmol) was loosely capped and was transferred into a glove box. To this vial was added [Ir(COD)<sub>2</sub>]BARF (5.1 mg, 0.004 mmol) and 0.1 mL of cyclopentanone (**1a**). This mixture was stirred for 5 min before it was transferred to another vial containing 7-aza-indoline (**L1**) (24 mg, 0.2 mmol) and 2-mesitylenesulfonic acid dihydrate (MSA·2H<sub>2</sub>O) (2.4 mg, 0.005 mmol) in 0.1 mL of cyclopentanone (**1a**). Another 0.3 mL of cyclopentanone (**1a**) was added to the first vial and was further transferred to the vial containing **L1**. *t*BuNH*t*Pr (4.6 mg, 0.04 mmol) was then added followed by the addition of 0.5 mL of 1-octene (**2a**). The vial was tightly capped, removed from glove box and heated at 130 °C for 96 h. After the completion of the reaction, the mixture was cooled to room temperature, diluted with ethyl acetate and passed through a short pad of silica gel. After concentration in vacuum, the crude mixture was subjected to flash chromatography (silica gel, Hexane/Et<sub>2</sub>O=40:1 to 30:1) to give the desired product **3a** (31 mg, TON [based on iridium] = 40) as a colorless oil.

### General procedure B: Ir(I)-catalyzed $\alpha$ -alkylation of 1-indanone using 1-octene:

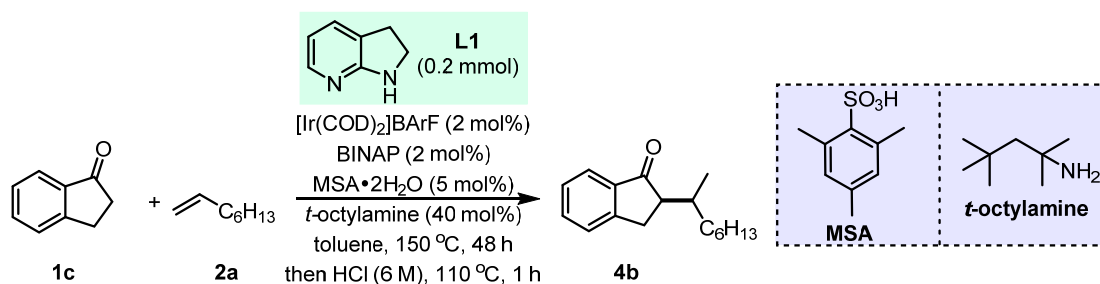

A 4-mL vial charged with a stir bar, 1-indanone (**1c**) (264 mg, 2 mmol), 7-azaindoline (**L1**) (24 mg, 0.2 mmol) and 2-mesitylenesulfonic acid dihydrate ( $\text{MSA}\cdot 2\text{H}_2\text{O}$ ) (2.4 mg, 0.005 mmol) was loosely capped and was transferred into a glove box. To this vial was added 0.2 mL of toluene and the resulted mixture was well stirred. Another 4-mL vial charged with a stir bar and *rac*-BINAP (2.5 mg, 0.004 mmol) was loosely capped and was transferred into the glove box. To this vial was added  $[\text{Ir}(\text{COD})_2]\text{BARF}$  (5.1 mg, 0.004 mmol) and 0.1 mL of toluene. This mixture was stirred for 10 min before it was transferred to the first vial containing 1-indanone (**1c**). *t*-Octylamine (10.3 mg, 0.08 mmol) was then added to the same vial followed by the addition of 0.5 mL of 1-octene. The vial was tightly capped, removed from the glove box and heated at 150 °C for 48 h. After completion of the reaction, the mixture was cooled to room temperature. To this vial was further added 0.4 mL of HCl (6 M) and then was tightly capped and heated at 110 °C for 1 h. After cooling to room temperature, the reaction mixture was diluted with ethyl acetate and the organic layer was passed through a short pad of silica gel and  $\text{K}_2\text{CO}_3$ . After concentration in vacuum, the crude mixture was subjected to flash chromatography (silica gel, Hexane/ $\text{Et}_2\text{O}$ =25:1 to 10:1) to give the desired product **4b** (31 mg, TON [based on iridium] = 32) as a colorless oil and to recover the remaining 1-indanone **1c** (209 mg, recovering yield = 80%).

**Table S2:** Condition optimizations when cyclopentanone was used as the limiting reagent<sup>[a]</sup>

| entry           | x   | additive                               | solvent     | yield of <b>5a</b> (%) <sup>[b]</sup> | d.r. of <b>5a</b> <sup>[c]</sup> | branched/linear <sup>[c]</sup> |
|-----------------|-----|----------------------------------------|-------------|---------------------------------------|----------------------------------|--------------------------------|
| 1               | 1   | --                                     | toluene     | 23                                    | 1.3:1                            | > 20:1                         |
| 2               | 0.8 | --                                     | toluene     | 40                                    | 1.3:1                            | --                             |
| 3               | 0.6 | --                                     | toluene     | 43                                    | 1.2:1                            | --                             |
| 4               | 0.4 | --                                     | toluene     | 38                                    | 1.2:1                            | > 20:1                         |
| 5               | 0.2 | --                                     | toluene     | 29                                    | 1.1:1                            | > 20:1                         |
| 6               | 0.6 | --                                     | 1,4-dioxane | 41                                    | 1.3:1                            | > 20:1                         |
| 7               | 0.6 | --                                     | THF         | 21                                    | 1.3:1                            | > 20:1                         |
| 8               | 0.6 | --                                     | MeTHF       | 33                                    | 1.3:1                            | > 20:1                         |
| 9               | 0.6 | H <sub>2</sub> O                       | toluene     | 23                                    | 1.3:1                            | >20:1                          |
| 10              | 0.6 | PhCO <sub>2</sub> H                    | toluene     | 21                                    | 1.3:1                            | > 20:1                         |
| 11              | 0.6 | 4-Me-2-amino-PhCO <sub>2</sub> H       | toluene     | 26                                    | 1.2:1                            | > 20:1                         |
| 12              | 0.6 | 2,6-lutidine                           | toluene     | 48                                    | 1.4:1                            | > 20:1                         |
| 13              | 0.6 | 2,6-bi- <i>t</i> Bu-4-Me-pyridine      | toluene     | 56                                    | 1.3:1                            | > 20:1                         |
| 14              | 0.6 | 1,2,2,6,6-Me <sub>5</sub> -piperidine  | toluene     | 53                                    | 1.3:1                            | > 20:1                         |
| 15 <sup>d</sup> | 0.6 | <b>2,6-bi-<i>t</i>Bu-4-Me-pyridine</b> | toluene     | <b>72</b>                             | 1.3:1                            | > 20:1                         |

[a] Unless otherwise noted, all reactions were conducted with 0.2 mmol of **1a**, 400 μL of octene (13 equiv) in 0.1 mL of toluene; [b] GC yield by using dodecane as an internal standard. [c] Selectivities were determined by GC of the crude products. [d] Reaction time = 96 h.

**General procedure C: Ir(I)-catalyzed  $\alpha$ -alkylation with cyclopentanone as the limiting reagent:**

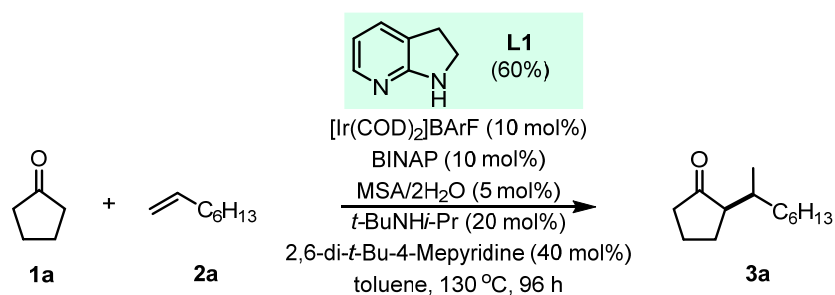

A 4-mL vial charged with a stir bar and *rac*-BINAP (12.4 mg, 0.02 mmol) was loosely capped and was transferred into a glove box. To this vial was added [Ir(COD)<sub>2</sub>]BARF (25.4 mg, 0.02 mmol) and 0.1 mL of toluene. This mixture was stirred for 5 min before it was transferred to another vial containing cyclopentanone (**1a**) (16.8 mg, 0.2 mmol), 7-azaindoline (**L1**) (14.4 mg, 0.12 mmol) and 2-mesitylenesulfonic acid dihydrate (MSA·2H<sub>2</sub>O) (2.4 mg, 0.005 mmol). 2,6-di-*t*-Bu-4-methylpyridine (16.4 mg, 0.08 mmol) and *t*BuNH*i*Pr (4.6 mg, 0.04 mmol) was then added followed by the addition of 0.4 mL of 1-octene (**2a**) (2.6 mmol, 13 equiv). The vial was tightly capped, removed from glove box and heated at 130 °C for 96 h. After completion of the reaction, the mixture was cooled to room temperature, diluted with ethyl acetate and passed through a short pad of silica gel. After concentration in vacuum, the crude mixture was subjected to flash chromatography (silica gel, Hexane/Et<sub>2</sub>O=40:1 to 30:1) to give the desired product **3a** (27 mg, 68% yield) as a colorless oil.

**General procedure D: Ir(I)-catalyzed  $\alpha$ -alkylation of 1-indanone with 1-octene as the limiting reagent:**

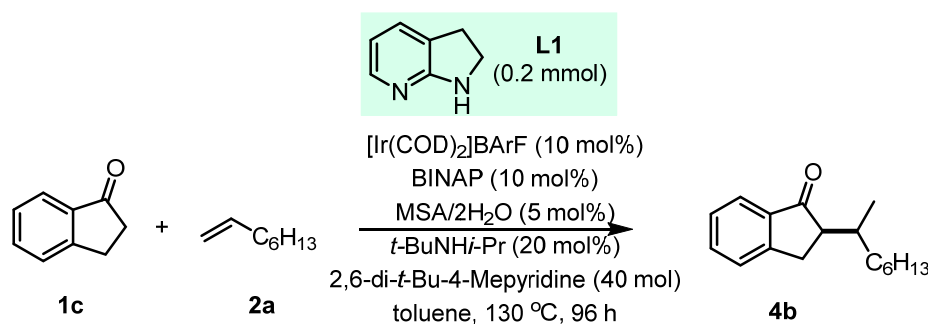

A 4-mL vial charged with a stir bar and *rac*-BINAP (12.4 mg, 0.02 mmol) was loosely capped and was transferred into a glove box. To this vial was added [Ir(COD)<sub>2</sub>]BARF (25.4 mg, 0.02 mmol) and 0.1 mL of toluene. This mixture was stirred for 5 min before it was transferred to another vial containing 1-indanone (**1c**) (26.4 mg, 0.2 mmol), 7-azaindoline (**L1**) (14.4 mg, 0.12 mmol) and 2-mesitylenesulfonic acid dihydrate (MSA·2H<sub>2</sub>O) (2.4 mg, 0.005 mmol). 2,6-Di-*t*-Bu-4-methylpyridine (16.4 mg, 0.08 mmol) and *t*BuNH*i*Pr (4.6 mg, 0.04 mmol) was then added followed by the addition of 1-octene (**2a**) (400  $\mu$ L mg, 2.6 mmol, 13 equiv). The vial was tightly capped, removed from glove box and heated at 130 °C for 96 h. After completion of the reaction, the mixture was cooled to room temperature. To this vial was further added 0.2 mL of HCl (6 M). The vial was tightly capped and was heated at 110 °C for 1 h. The

mixture was then cooled to room temperature, diluted with ethyl acetate and passed through a short pad of silica gel. After concentration in vacuum, the crude mixture was subjected to flash chromatography (silica gel, Hexane/Et<sub>2</sub>O=25:1 to 10:1) to give the desired product **4b** (21 mg, 43% yield) as a colorless oil.

### Example of increasing dr for product **3a**:

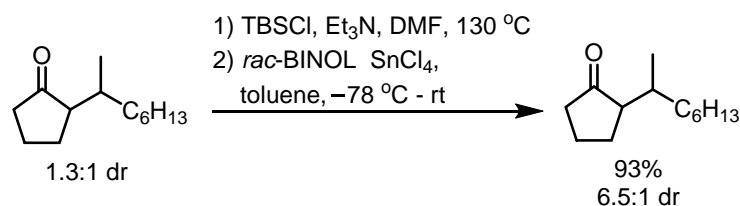

To a solution of **3a** (180 mg, 0.92 mmol) and triethylamine (2.2 mmol) in DMF (2 mL) was added TBSCl (1.1 mmol) dropwise with stirring. The mixture was heated at 130 °C for 90 h. After cooling, the mixture was diluted with Et<sub>2</sub>O (10 mL) and washed with ice-cold aqueous NaHCO<sub>3</sub> solution (10 mL). The aqueous phase was re-extracted with Et<sub>2</sub>O (3 × 10 mL). After drying over MgSO<sub>4</sub> and concentration in vacuo, the crude mixture was directly used for the next step.

To a flame-dried 25 mL Schlenk tube containing *rac*-BINOL (1 mmol) and toluene (20 mL) was added a solution of SnCl<sub>4</sub> (1.0 mL, 1 mmol, 1.0 M solution in CH<sub>2</sub>Cl<sub>2</sub>) dropwise at room temperature. After being stirred for 5 min, the reaction mixture was cooled to -78 °C. The crude silyl ether obtained above (considered as 0.9 mmol, dissolved in 1 mL of toluene) was added dropwise. After being stirred at -78 °C for 6 h, the mixture was poured into saturated NH<sub>4</sub>Cl, extracted with Et<sub>2</sub>O twice, dried over MgSO<sub>4</sub>, filtered, and concentrated in vacuo. Purification of the crude product by flash chromatography (eluent, 40:1 to 30:1 PE/Et<sub>2</sub>O) gave **3a** (168 mg) with a 6.5:1 dr.

### Characterization data of products

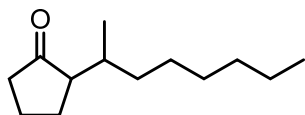



**2-(octan-2-yl)cyclopentan-1-one 3a:**<sup>11</sup> Synthesized from cyclopentanone and 1-octene by following general procedure A on a 0.2 mmol scale of **L1**. 31 mg obtained. TON (based on iridium) = 40. Or synthesized from cyclopentanone and 1-octene by following general procedure C on a 0.2 mmol scale of cyclopentanone. Yield = 68%. Isolated as a mixture with dr: 1.5:1. Colorless liquid.  $R_f = 0.4$  (Hex:Et<sub>2</sub>O=20:1). <sup>1</sup>H NMR (500 MHz, CDCl<sub>3</sub>)  $\delta$  2.34 – 2.24 (m, 1H), 2.15 – 1.89 (m, 5H), 1.77 – 1.59 (m, 2H), 1.33 – 1.09 (m, 10H), 0.94 (d,  $J = 6.8$  Hz, 1.2H), 0.90 – 0.83 (m, 3H), 0.74 (d,  $J = 6.7$  Hz, 1.8H). <sup>13</sup>C NMR (101 MHz, CDCl<sub>3</sub>)  $\delta$  221.70, 221.10, 54.94, 53.49, 39.37, 39.35, 35.40, 33.26, 32.49, 31.84, 31.72, 29.49, 29.37, 27.57, 27.29, 25.24, 23.63, 22.63, 20.72, 20.68, 18.05, 15.57, 14.07.

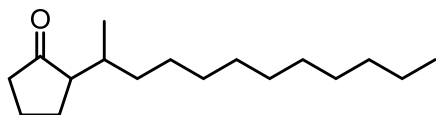

**2-(dodecan-2-yl)cyclopentan-1-one 3b:**<sup>11</sup> Synthesized from cyclopentanone and 1-dodecene by following general procedure A on a 0.2 mmol scale of **L1**. 38 mg obtained. TON (based on iridium) = 38. Isolated as a mixture with dr: 2.5:1. Colorless liquid.  $R_f = 0.45$  (Hex:Et<sub>2</sub>O=10:1). <sup>1</sup>H NMR (500 MHz, CDCl<sub>3</sub>)  $\delta$  2.38 – 2.24 (m, 1H), 2.18 – 1.91 (m, 5H), 1.82 – 1.62 (m, 2H), 1.37 – 1.11 (m, 18H), 0.95 (d,  $J = 6.9$  Hz, 0.85H), 0.87 (t,  $J = 6.9$  Hz, 3H), 0.74 (d,  $J = 6.8$  Hz, 2.15H). <sup>13</sup>C NMR (101 MHz, CDCl<sub>3</sub>)  $\delta$  221.78, 221.18, 54.95, 53.50, 39.37, 35.41, 33.28, 32.50, 31.90, 31.73, 29.85, 29.72, 29.64, 29.62, 29.33, 27.63, 27.34, 25.25, 23.62, 22.68, 20.73, 20.70, 18.07, 15.58, 14.11.

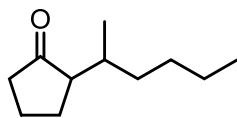

**2-(hexan-2-yl)cyclopentan-1-one 3c:**<sup>11</sup> Synthesized from cyclopentanone and 1-hexene by following general procedure A on a 0.2 mmol scale of **L1**. 24 mg obtained. TON (based on iridium) = 36. Or synthesized from cyclopentanone and 1-hexene by following general procedure C on a 0.2 mmol scale of cyclopentanone. Yield = 59%. Isolated as a mixture with dr: 1.5:1. Colorless liquid.  $R_f = 0.4$  (pentane:Et<sub>2</sub>O=20:1). <sup>1</sup>H NMR (500 MHz, CDCl<sub>3</sub>)  $\delta$  2.34 – 2.25 (m, 1H), 2.19 – 1.89 (m, 5H), 1.78 – 1.63 (m, 2H), 1.35 – 1.08 (m, 6H), 0.95 (d,  $J = 6.9$  Hz, 1.2H), 0.92 – 0.83 (m, 3H), 0.74 (d,  $J = 6.8$  Hz, 1.8H). <sup>13</sup>C NMR (101 MHz, CDCl<sub>3</sub>)  $\delta$  221.76, 221.18, 54.96, 53.51, 39.39, 39.37, 35.09, 32.94, 32.44, 31.71, 29.82, 29.56, 25.24, 23.63, 22.86, 22.76, 20.73, 20.69, 18.07, 15.59, 14.08.

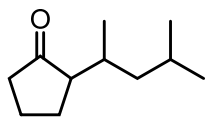

**2-(4-methylpentan-2-yl)cyclopentan-1-one 3d:**<sup>11</sup> Synthesized from cyclopentanone and 4-methylpent-1-ene by following general procedure A on a 0.2 mmol scale of **L1**. 22 mg obtained. TON (based on iridium) = 32. Isolated as a mixture with dr: 1:1. Colorless liquid.  $R_f = 0.4$  (pentane:Et<sub>2</sub>O=20:1). <sup>1</sup>H NMR (500 MHz, CDCl<sub>3</sub>)  $\delta$  2.35 – 2.27 (m, 1H), 2.23 – 1.94 (m, 5H), 1.79 – 1.51 (m, 3.6H), 1.18 – 1.08 (m, 2H), 0.93 (d,  $J = 6.6$  Hz, 1.5H), 0.90 – 0.83 (m, 5.4H), 0.73 (d,  $J = 6.7$  Hz, 1.5H). <sup>13</sup>C NMR (101 MHz, CDCl<sub>3</sub>)  $\delta$  221.68, 221.00, 55.00, 53.63, 44.71, 42.51, 39.49, 39.41, 30.02, 29.22, 25.33, 25.25, 25.16, 23.92, 23.55, 22.97, 22.42, 21.46, 20.76, 20.71, 18.00, 15.49.

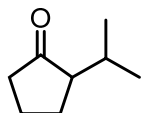

**2-isopropylcyclopentan-1-one 3e:**<sup>11,12</sup> Synthesized from cyclopentanone and pre-condensed propene by following general procedure A on a 0.8 mmol scale of **L1**. 85 mg obtained. C TON (based on iridium) = 42. Colorless liquid.  $R_f = 0.45$  (pentane:Et<sub>2</sub>O=20:1). <sup>1</sup>H NMR (500 MHz, CDCl<sub>3</sub>)  $\delta$  2.32 – 2.25 (m, 1H), 2.18 – 2.10 (m, 1H), 2.08 – 1.95 (m, 4H), 1.78 – 1.62 (m, 2H), 0.98 (d,  $J = 6.9$  Hz, 3H), 0.81 (d,  $J = 6.7$  Hz, 3H). <sup>13</sup>C NMR (101 MHz, CDCl<sub>3</sub>)  $\delta$  221.12, 55.07, 39.20, 27.37, 24.62, 21.12, 20.61, 18.40.

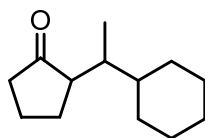

**2-(1-cyclohexylethyl)cyclopentan-1-one 3f:** Synthesized from cyclopentanone and vinylcyclohexane by following general procedure A on a 0.2 mmol scale of **L1**. 8.5 mg obtained. TON (based on iridium) = 11. Isolated as a mixture with dr: 1.7:1. Colorless liquid.  $R_f = 0.42$  (Hex:Et<sub>2</sub>O=20:1). <sup>1</sup>H NMR (500 MHz, CDCl<sub>3</sub>)  $\delta$  2.39 – 2.16 (m, 2H), 2.13 – 1.86 (m, 3H), 1.81 – 1.46 (m, 7H), 1.29 – 1.08 (m, 6H), 0.98 – 0.82 (m, 2.2H), 0.72 (d,  $J = 6.9$  Hz, 1.9H). <sup>13</sup>C NMR (101 MHz, CDCl<sub>3</sub>)  $\delta$  222.50, 221.69, 51.81, 49.38, 41.44, 39.26, 38.22, 37.71, 37.02, 35.27, 33.42, 33.16, 31.01, 30.53, 29.60, 27.08, 26.67, 26.62, 26.52, 26.49, 26.37, 26.34, 24.04, 20.77, 20.74, 13.21. IR(KBr) 2958, 2924, 2853, 1738, 1465, 1406, 1378, 1268 cm<sup>-1</sup>. HRMS: calcd. C<sub>13</sub>H<sub>22</sub>O [M]<sup>+</sup>: 194.1671. Found: 194.1704.

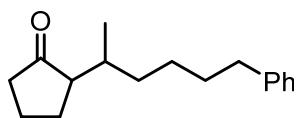

**2-(6-phenylhexan-2-yl)cyclopentan-1-one 3g:** Synthesized from cyclopentanone and hex-5-en-1-ylbenzene by following general procedure A on a 0.2 mmol scale of **L1**. 37 mg obtained. TON (based on iridium) = 38. Or synthesized from cyclopentanone and hex-5-en-1-ylbenzene by following general procedure C on a 0.2 mmol scale of cyclopentanone. Yield = 62%. Isolated as a mixture with dr: 1.3:1. Colorless liquid.  $R_f = 0.45$  (Hex:Et<sub>2</sub>O=20:1). <sup>1</sup>H NMR (500 MHz, CDCl<sub>3</sub>)  $\delta$  7.30 – 7.24 (m, 2H), 7.19 – 7.14 (m, 3H), 2.68 – 2.52 (m, 2H), 2.39 – 2.24 (m, 1H), 2.16 – 1.92 (m, 5H), 1.78 – 1.51 (m, 4H), 1.41 – 1.11 (m, 4H), 0.95 (d,  $J = 6.8$  Hz, 1.7H), 0.75 (d,  $J = 6.7$  Hz, 1.3H). <sup>13</sup>C NMR (101 MHz, CDCl<sub>3</sub>)  $\delta$  221.61, 221.07, 142.72, 142.65, 128.37, 128.36, 128.22, 128.19, 125.59, 125.54, 54.90, 53.47, 39.36, 39.33, 35.89, 35.86, 35.20, 33.04, 32.38, 31.72, 31.56, 31.50, 27.23, 26.96, 25.22, 23.68, 20.71, 20.67, 18.05, 15.61. IR(KBr) 2957, 2930, 2856, 1735, 1496, 1453, 1153 cm<sup>-1</sup>. HRMS: calcd. C<sub>17</sub>H<sub>25</sub>O [M+H]<sup>+</sup>: 245.1900. Found: 245.1894.

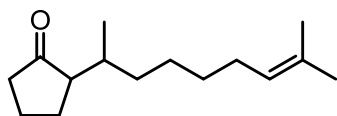

**2-(8-methylnon-7-en-2-yl)cyclopentan-1-one 3h:** Synthesized from cyclopentanone and hex-5-en-1-ylbenzene 8-methylnona-1,7-diene by following general procedure A on a 0.2 mmol scale of **L1**. 22 mg obtained. TON (based on iridium) = 25. Or synthesized from cyclopentanone and hex-5-en-1-ylbenzene 8-methylnona-1,7-diene by following general procedure C on a 0.2 mmol scale of cyclopentanone. Yield = 43%. Isolated as a mixture with dr: 1.3:1. Colorless liquid.  $R_f = 0.3$  (Hex:Et<sub>2</sub>O=20:1). <sup>1</sup>H NMR (500 MHz, CDCl<sub>3</sub>)  $\delta$  5.13 – 5.06 (m, 1H), 2.38 – 2.22 (m, 1H), 2.16 – 1.90 (m, 7H), 1.78 – 1.62 (m, 5H), 1.59 (s, 3H), 1.35 – 1.10 (m, 6H), 0.95 (d,  $J = 6.9$  Hz, 1.3H), 0.75 (d,  $J = 6.8$  Hz, 1.7H). <sup>13</sup>C NMR (101 MHz, CDCl<sub>3</sub>)  $\delta$  221.70, 221.11, 131.28, 131.21, 124.76, 124.70, 54.94, 53.50, 39.38, 39.37, 35.32, 33.17, 32.48, 31.77, 30.01, 29.92, 27.97, 27.26, 27.00, 25.71, 25.26, 23.65, 20.74, 20.70, 18.08, 17.67, 17.66, 15.61. IR(KBr) 2962, 2929, 2876, 1734, 1457, 1378, 1155 cm<sup>-1</sup>. HRMS: calcd. C<sub>15</sub>H<sub>27</sub>O [M+H]<sup>+</sup>: 223.2056. Found: 223.2059.

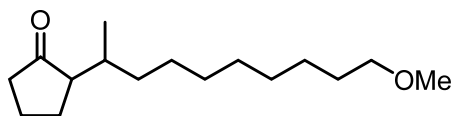

**2-(10-methoxydecyl)cyclopentan-1-one 3i:**<sup>11</sup> Synthesized from cyclopentanone and 10-methoxydec-1-ene by following general procedure A on a 0.2 mmol scale of **L1**. 24 mg obtained. TON (based on iridium) = 24. Isolated as a mixture with dr: 1.1:1. Colorless liquid.  $R_f = 0.25$  (Hex:Et<sub>2</sub>O=5:1). <sup>1</sup>H NMR (500 MHz, CDCl<sub>3</sub>)  $\delta$  3.39 – 3.31 (m, 5H), 2.35 – 2.27 (m, 1H), 2.15 – 1.91 (m, 5H), 1.78 – 1.62 (m, 2H), 1.61 – 1.51 (m, 2H), 1.36 – 1.12 (m, 12H), 0.95 (d,  $J = 6.9$  Hz, 1.4H), 0.74 (d,  $J = 6.7$  Hz, 1.6H). <sup>13</sup>C NMR (101 MHz, CDCl<sub>3</sub>)  $\delta$  221.75, 221.15, 72.95, 58.53, 54.95, 53.51, 39.39, 39.37, 35.39, 33.25, 32.49, 31.73, 29.75, 29.63, 29.55, 29.46, 27.59, 27.31, 26.13, 26.11, 25.26, 23.65, 20.73, 20.70, 18.07, 15.59.

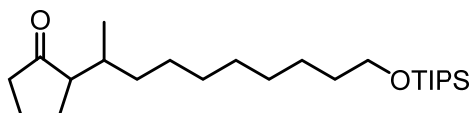

**2-(10-((triisopropylsilyloxy)decyl)cyclopentan-1-one 3j:**<sup>11</sup> Synthesized from cyclopentanone and (dec-9-en-1-yloxy)triisopropylsilane by following general procedure A on a 0.2 mmol scale of **L1**. 52 mg obtained. TON (based on iridium) = 33. Isolated as a mixture with dr: 1.5:1. Colorless liquid.  $R_f = 0.35$  (Hex:Et<sub>2</sub>O=20:1). <sup>1</sup>H NMR (400 MHz, CDCl<sub>3</sub>)  $\delta$  3.66 (td,  $J = 6.7, 1.7$  Hz, 2H), 2.36 – 2.25 (m, 1H), 2.18 – 1.91 (m, 5H), 1.80 – 1.62 (m, 2H), 1.56 – 1.48 (m, 2H), 1.39 – 1.13 (m, 12H), 1.13 – 1.01 (m, 21H), 0.95 (d,  $J = 6.9$  Hz, 1.2H), 0.75 (d,  $J = 6.8$  Hz, 1.8H). <sup>13</sup>C NMR (101 MHz, CDCl<sub>3</sub>)  $\delta$  221.73, 221.13, 63.51, 54.94, 53.51, 39.39, 39.37, 35.41, 33.29, 33.04, 32.52, 31.75, 29.80, 29.68, 29.62, 29.45, 27.61, 27.34, 25.81, 25.29, 23.64, 20.74, 20.70, 18.06, 18.03, 15.59, 12.03.

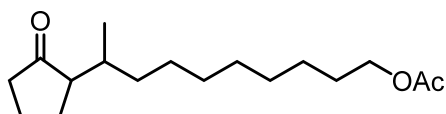

**9-(2-oxocyclopentyl)decyl acetate 3k:**<sup>11</sup> Synthesized from cyclopentanone and dec-9-en-1-yl acetate by following general procedure A on a 0.2 mmol scale of **L1**. 27 mg obtained. TON (based on iridium) = 24. Isolated as a mixture with dr: 1.1:1. Colorless liquid.  $R_f = 0.45$  (CH<sub>2</sub>Cl<sub>2</sub>:Et<sub>2</sub>O=10:1). <sup>1</sup>H NMR (500 MHz, CDCl<sub>3</sub>)  $\delta$  4.04 (td,  $J = 6.8, 2.0$  Hz, 2H), 2.35 – 2.23 (m, 1H), 2.15 – 1.91 (m, 8H), 1.80 – 1.55 (m, 4H), 1.37 – 1.09 (m, 12H), 0.95 (d,  $J = 6.9$  Hz, 1.6H), 0.74 (d,  $J = 6.8$  Hz, 1.4H). <sup>13</sup>C NMR (101 MHz, CDCl<sub>3</sub>)  $\delta$  221.69, 221.12, 171.22, 64.64, 64.63, 54.95, 53.51, 39.39, 39.36, 35.37, 33.22, 32.46, 31.73,

29.71, 29.61, 29.49, 29.47, 29.22, 28.59, 27.58, 27.30, 25.89, 25.25, 23.67, 21.02, 20.73, 20.69, 18.05, 15.60.

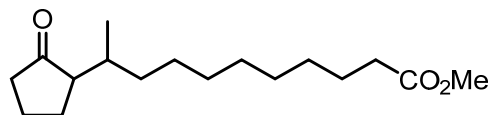

**methyl 10-(2-oxocyclopentyl)undecanoate 3l:** Synthesized from cyclopentanone and methyl undec-10-enoate by following general procedure A on a 0.2 mmol scale of **L1**. 34 mg obtained. TON (based on iridium) = 30. Isolated as a mixture with dr: 1.3:1. Colorless liquid.  $R_f = 0.4$  ( $\text{CH}_2\text{Cl}_2:\text{Et}_2\text{O}=20:1$ ).  $^1\text{H}$  NMR (500 MHz,  $\text{CDCl}_3$ )  $\delta$  3.65 (s, 3H), 2.34 – 2.25 (m, 3H), 2.16 – 1.89 (m, 5H), 1.77 – 1.53 (m, 4H), 1.33 – 1.07 (m, 12H), 0.93 (d,  $J = 6.9$  Hz, 1.3H), 0.73 (d,  $J = 6.8$  Hz, 1.7H).  $^{13}\text{C}$  NMR (101 MHz,  $\text{CDCl}_3$ )  $\delta$  221.64, 221.06, 174.27, 174.26, 54.91, 53.47, 51.38, 39.35, 39.33, 35.35, 34.07, 33.21, 32.45, 31.70, 29.70, 29.59, 29.38, 29.36, 29.19, 29.09, 27.54, 27.26, 25.24, 24.91, 23.63, 20.70, 20.67, 18.02, 15.56. IR(KBr) 2927, 2854, 1738, 1458, 1436, 1197, 1166  $\text{cm}^{-1}$ . HRMS: calcd.  $\text{C}_{17}\text{H}_{30}\text{O}_3$   $[\text{M}]^+$ : 282.2195. Found: 282.2212.

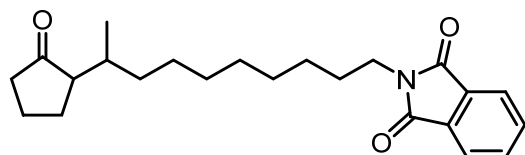

**2-(9-(2-oxocyclopentyl)decyl)isoindoline-1,3-dione 3m:** Synthesized from cyclopentanone and 2-(dec-9-en-1-yl)isoindoline-1,3-dione by following general procedure A on a 0.2 mmol scale of **L1**. 55 mg obtained. TON (based on iridium) = 37. Or synthesized from cyclopentanone and 2-(dec-9-en-1-yl)isoindoline-1,3-dione by following general procedure C on a 0.2 mmol scale of cyclopentanone. Yield = 39%. Isolated as a mixture with dr: 1.5:1. Colorless liquid.  $R_f = 0.42$  ( $\text{CH}_2\text{Cl}_2:\text{Et}_2\text{O}=50:1$ ).  $^1\text{H}$  NMR (500 MHz,  $\text{CDCl}_3$ )  $\delta$  7.83 (dd,  $J = 5.4, 3.1$  Hz, 2H), 7.70 (dd,  $J = 5.5, 3.1$  Hz, 2H), 3.66 (td,  $J = 7.4, 1.9$  Hz, 2H), 2.35 – 2.24 (m, 1H), 2.16 – 1.89 (m, 5H), 1.75 – 1.61 (m, 4H), 1.35 – 1.09 (m, 12H), 0.94 (d,  $J = 6.9$  Hz, 1.2H), 0.73 (d,  $J = 6.8$  Hz, 1.8H).  $^{13}\text{C}$  NMR (101 MHz,  $\text{CDCl}_3$ )  $\delta$  221.67, 221.08, 168.42, 133.79, 133.78, 132.17, 123.11, 54.90, 53.47, 39.36, 39.34, 38.04, 35.35, 33.22, 32.48, 31.73, 29.70, 29.60, 29.42, 29.14, 28.57, 27.53, 27.28, 26.83, 25.28, 23.63, 20.71, 20.67, 18.03, 15.57. IR(KBr) 2927, 2854, 1772, 1733, 1713, 1466, 1396, 1369  $\text{cm}^{-1}$ . HRMS: calcd.  $\text{C}_{23}\text{H}_{32}\text{NO}_3$   $[\text{M}+\text{H}]^+$ : 370.2377. Found: 370.2375.

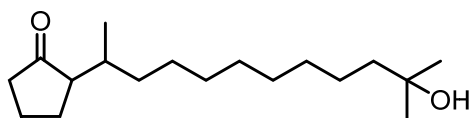

**2-(11-hydroxy-11-methyldodecan-2-yl)cyclopentan-1-one 3n:** Synthesized from cyclopentanone and 2-methyldodecan-2-ol by following general procedure A on a 0.2 mmol scale of **L1**. 24 mg obtained. TON (based on iridium) = 21. Isolated as a mixture with dr: 1.4:1. Colorless liquid.  $R_f = 0.4$  ( $\text{CH}_2\text{Cl}_2:\text{Et}_2\text{O}=10:1$ ).  $^1\text{H}$  NMR (500 MHz,  $\text{CDCl}_3$ )  $\delta$  2.34 – 2.25 (m, 1H), 2.15 – 1.90 (m, 5H), 1.77 – 1.61 (m, 2H), 1.49 – 1.41 (m, 2H), 1.37 – 1.12 (m, 21H), 0.95 (d,  $J = 6.8$  Hz, 1.25H), 0.74 (d,  $J = 6.8$  Hz, 1.75H).  $^{13}\text{C}$  NMR (101 MHz,  $\text{CDCl}_3$ )  $\delta$  221.75, 221.18, 71.03, 54.96, 53.50, 43.98, 39.39, 39.36, 35.38, 33.19, 32.44, 31.72, 30.16, 30.12, 29.75, 29.68, 29.59, 29.56, 29.49, 29.22, 29.19, 27.56, 27.30, 25.23, 24.32, 24.29, 23.66, 20.73, 20.69, 18.06, 15.60. IR(KBr) 3439, 2964, 2927, 2854, 1735, 1466, 1377, 1153  $\text{cm}^{-1}$ . HRMS: calcd.  $\text{C}_{18}\text{H}_{34}\text{O}_2$   $[\text{M}]^+$ : 282.2559. Found: 282.2549.

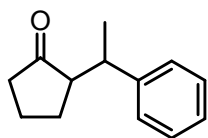

**2-(1-phenylethyl)cyclopentan-1-one 3o:**<sup>11,13</sup> Synthesized from cyclopentanone and styrene by following general procedure A on a 0.2 mmol scale of **L1**. 7.5 mg obtained. TON (based on iridium) = 10. Isolated as a mixture with dr: 1.3:1. Colorless liquid.  $R_f = 0.35$  ( $\text{Hex}:\text{Et}_2\text{O}=10:1$ ).  $^1\text{H}$  NMR (500 MHz,  $\text{CDCl}_3$ )  $\delta$  7.32 – 7.14 (m, 5H), 3.42 (qd,  $J = 7.2, 3.9$  Hz, 0.43H), 3.22 (p,  $J = 7.0$  Hz, 0.57H), 2.40 – 2.18 (m, 2H), 2.10 – 1.43 (m, 5H), 1.42 (d,  $J = 7.1$  Hz, 1.7H), 1.20 (d,  $J = 7.2$  Hz, 1.3H).  $^{13}\text{C}$  NMR (101 MHz,  $\text{CDCl}_3$ )  $\delta$  220.26, 219.89, 145.38, 144.10, 128.36, 128.19, 127.96, 127.31, 126.29, 126.18, 55.88, 55.26, 39.12, 39.10, 38.88, 37.92, 26.60, 24.58, 20.44, 20.37, 20.01, 15.47.

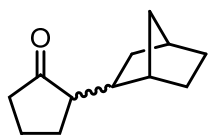

**2-bicyclo[2.2.1]heptan-2-yl)cyclopentan-1-one 3p:** Synthesized from cyclopentanone and norbornene by following general procedure A on a 0.2 mmol scale of **L1**. 25 mg obtained. TON (based on iridium) = 35. Or synthesized from cyclopentanone and norbornene by following general procedure C on a 0.2 mmol scale of cyclopentanone. Yield = 53%. Isolated as a mixture with dr: 1.1:1 (determined by  $^{13}\text{C}$

NMR). Colorless liquid.  $R_f = 0.45$  (Hex:Et<sub>2</sub>O=10:1). <sup>1</sup>H NMR (500 MHz, CDCl<sub>3</sub>)  $\delta$  2.51 – 2.47 (m, 0.4H), 2.29 – 1.82 (m, 6.6H), 1.80 – 1.67 (m, 1H), 1.66 – 1.54 (m, 2H), 1.54 – 1.36 (m, 3.5H), 1.32 – 1.24 (m, 1H), 1.21 – 1.05 (m, 3.5H). <sup>13</sup>C NMR (126 MHz, CDCl<sub>3</sub>)  $\delta$  221.09, 220.73, 54.17, 53.38, 42.74, 42.31, 39.72, 39.23, 38.61, 38.37, 37.03, 36.86, 36.72, 35.97, 35.67, 35.50, 30.41, 30.27, 28.93, 28.64, 28.62, 27.46, 20.41. IR(KBr) 2922, 2360, 2341, 1734, 1653, 1559, 1457, 1260 cm<sup>-1</sup>. HRMS: calcd. C<sub>12</sub>H<sub>19</sub>O [M+H]<sup>+</sup>: 179.1430. Found: 179.1424.

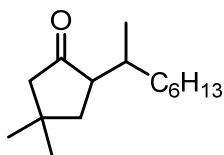

**4,4-dimethyl-2-(octan-2-yl)cyclopentan-1-one 4a**:<sup>11</sup> Synthesized from 3,3-dimethylcyclopentanone and 1-octene by following general procedure A and further treated with 0.5 mL of HCl (6 M) and 0.5 mL of toluene at 110 °C for 1 h on a 0.2 mmol scale of **L1**. 18 mg obtained. TON (based on iridium) = 20. Isolated as a mixture with dr: 1.3:1. Colorless liquid.  $R_f = 0.4$  (Hex:Et<sub>2</sub>O=20:1). <sup>1</sup>H NMR (500 MHz, CDCl<sub>3</sub>)  $\delta$  2.48 – 2.40 (m, 0.56H), 2.35 – 2.29 (m, 0.44H), 2.17 – 1.87 (m, 3H), 1.85 – 1.68 (m, 1H), 1.62 – 1.56 (m, 1H), 1.35 – 1.13 (m, 13H), 1.05 – 1.00 (m, 3H), 0.93 (d,  $J = 6.9$  Hz, 1.3H), 0.91 – 0.84 (m, 3H), 0.74 (d,  $J = 6.8$  Hz, 1.7H). <sup>13</sup>C NMR (101 MHz, CDCl<sub>3</sub>)  $\delta$  221.87, 221.23, 54.59, 54.55, 53.80, 52.39, 39.47, 37.67, 35.24, 33.64, 33.63, 33.21, 33.04, 32.09, 31.85, 29.85, 29.83, 29.51, 29.40, 27.73, 27.64, 27.54, 27.26, 22.66, 22.64, 17.84, 15.38, 14.09.

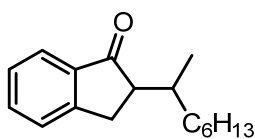

**2-(octan-2-yl)-2,3-dihydro-1H-inden-1-one 4b**: Synthesized from 1-indanone and 1-octene by following general procedure B on a 0.2 mmol scale of **L1**. 31 mg obtained. TON (based on iridium) = 32. Or synthesized from 1-indanone and 1-octene by following general procedure D on a 0.2 mmol scale of 1-indanone. Yield = 43%. Isolated as a mixture with dr: 2.1:1. Colorless liquid.  $R_f = 0.5$  (Hex:Et<sub>2</sub>O=10:1). <sup>1</sup>H NMR (500 MHz, CDCl<sub>3</sub>)  $\delta$  7.77 – 7.72 (m, 1H), 7.57 (t,  $J = 7.4$  Hz, 1H), 7.49 – 7.44 (m, 1H), 7.35 (t,  $J = 7.4$  Hz, 1H), 3.18 (dd,  $J = 17.4, 8.1$  Hz, 0.38H), 3.09 (dd,  $J = 17.4, 8.1$  Hz, 0.62H), 2.96 – 2.89 (m, 1H), 2.78 (dt,  $J = 8.1, 4.0$  Hz, 0.62H), 2.70 (dt,  $J = 8.2, 4.1$  Hz, 0.38H), 2.37 – 2.29 (m, 0.62H), 2.23 – 2.15 (m, 0.38H), 1.42 – 1.11 (m, 10H), 1.00 (d,  $J = 6.9$  Hz, 1.14H), 0.93 – 0.81

(m, 3H), 0.70 (d,  $J = 6.8$  Hz, 1.86H).  $^{13}\text{C}$  NMR (101 MHz,  $\text{CDCl}_3$ )  $\delta$  209.42, 208.84, 154.37, 154.14, 137.77, 137.72, 134.49, 134.45, 127.17, 126.49, 126.45, 123.58, 123.55, 52.89, 51.51, 35.39, 34.37, 33.46, 32.22, 31.86, 31.81, 29.42, 29.15, 27.59, 27.52, 27.35, 22.65, 22.59, 17.74, 14.58, 14.10, 14.06. IR(KBr) 2956, 2925, 2854, 1712, 1609, 1464, 1281  $\text{cm}^{-1}$ . HRMS: calcd.  $\text{C}_{17}\text{H}_{25}\text{O}$   $[\text{M}+\text{H}]^+$ : 245.1900. Found: 245.1905.

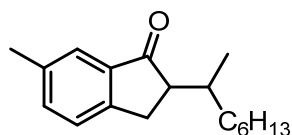

**6-methyl-2-(octan-2-yl)-2,3-dihydro-1H-inden-1-one 4c:** Synthesized from 6-methyl-1-indanone and 1-octene by following general procedure B on a 0.2 mmol scale of **L1**. 30 mg obtained. TON (based on iridium) = 29. Or synthesized from 6-methyl-1-indanone and 1-octene by following general procedure D on a 0.2 mmol scale of 6-methyl-1-indanone. Yield = 41%. Isolated as a mixture with dr: 1.5:1. Colorless liquid.  $R_f = 0.5$  (Hex:EtOAc=10:1).  $^1\text{H}$  NMR (500 MHz,  $\text{CDCl}_3$ )  $\delta$  7.57 – 7.51 (m, 1H), 7.41 – 7.38 (m, 1H), 7.37 – 7.33 (m, 1H), 3.12 (dd,  $J = 17.2, 8.1$  Hz, 0.4H), 3.04 (dd,  $J = 17.2, 8.0$  Hz, 0.6H), 2.89 (t,  $J = 3.3$  Hz, 0.6H), 2.85 (t,  $J = 3.4$  Hz, 0.4H), 2.77 (dt,  $J = 8.0, 4.0$  Hz, 0.6H), 2.69 (dt,  $J = 8.0, 4.0$  Hz, 0.4H), 2.40 (s, 3H), 2.35 – 2.28 (m, 0.6H), 2.24 – 2.14 (m, 0.4H), 1.41 – 1.13 (m, 11H), 0.99 (d,  $J = 6.9$  Hz, 1.2H), 0.88 (t,  $J = 7.0$  Hz, 1.8H), 0.84 (t,  $J = 7.0$  Hz, 1.2H), 0.69 (d,  $J = 6.8$  Hz, 1.8H).  $^{13}\text{C}$  NMR (101 MHz,  $\text{CDCl}_3$ )  $\delta$  209.52, 208.94, 151.74, 151.50, 137.94, 137.89, 137.06, 135.76, 135.71, 126.15, 126.11, 123.51, 123.49, 53.24, 51.84, 35.40, 34.40, 33.49, 32.18, 31.87, 31.81, 29.43, 28.76, 27.61, 27.36, 27.13, 22.65, 22.60, 21.06, 17.74, 14.55, 14.10, 14.06. IR(KBr) 2956, 2926, 2855, 1710, 1617, 1492, 1458, 1282, 1156  $\text{cm}^{-1}$ . HRMS: calcd.  $\text{C}_{18}\text{H}_{26}\text{O}$   $[\text{M}]^+$ : 258.1984. Found: 258.1985.

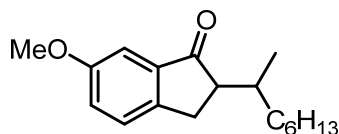

**6-methoxy-2-(octan-2-yl)-2,3-dihydro-1H-inden-1-one 4d:** Synthesized from 6-methoxy-1-indanone and 1-octene by following general procedure B on a 0.2 mmol scale of **L1**. 30 mg obtained. TON (based on iridium) = 27. Isolated as a mixture with dr: 1.3:1. Colorless liquid.  $R_f = 0.25$  (Hex:Et<sub>2</sub>O=20:1).  $^1\text{H}$  NMR (500 MHz,  $\text{CDCl}_3$ )  $\delta$  7.38 – 7.33 (m, 1H), 7.19 – 7.15 (m, 2H), 3.83 (s, 3H), 3.09 (dd,  $J = 17.0, 7.9$  Hz, 0.4H), 3.01 (dd,  $J = 16.8, 7.7$  Hz, 0.6H), 2.89 – 2.68 (m, 2H), 2.34 – 2.28 (m, 0.6H), 2.23 – 2.16



(m, 0.4H), 1.38 – 1.12 (m, 10H), 0.99 (d,  $J = 7.0$  Hz, 1.2H), 0.88 (t,  $J = 6.7$  Hz, 1.8H), 0.84 (t,  $J = 6.9$  Hz, 1.2H), 0.69 (d,  $J = 6.7$  Hz, 1.8H).  $^{13}\text{C}$  NMR (101 MHz,  $\text{CDCl}_3$ )  $\delta$  209.40, 208.82, 159.26, 147.21, 146.96, 138.88, 138.83, 127.17, 127.14, 123.95, 123.88, 104.70, 55.56, 53.73, 52.34, 35.38, 34.45, 33.56, 32.16, 31.86, 31.81, 29.42, 28.42, 27.60, 27.36, 26.81, 22.65, 22.59, 17.74, 14.54, 14.09, 14.05. IR(KBr) 2956, 2926, 2854, 1708, 1492, 1465, 1299, 1276, 1029  $\text{cm}^{-1}$ . HRMS: calcd.  $\text{C}_{18}\text{H}_{26}\text{O}_2$   $[\text{M}]^+$ : 274.1933. Found: 274.1944.

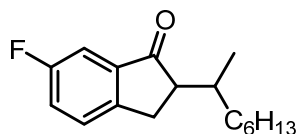

**6-fluoro-2-(octan-2-yl)-2,3-dihydro-1H-inden-1-one 4e:** Synthesized from 6-fluoro-1-indanone and 1-octene by following general procedure B on a 0.2 mmol scale of **L1**. 23 mg obtained. TON (based on iridium) = 22. Or synthesized from 6-fluoro-1-indanone and 1-octene by following general procedure D on a 0.2 mmol scale of 6-fluoro-1-indanone. Yield = 32%. Isolated as a mixture with dr: 2:1. Colorless liquid.  $R_f = 0.5$  (Hex:Et<sub>2</sub>O=10:1).  $^1\text{H}$  NMR (500 MHz,  $\text{CDCl}_3$ )  $\delta$  7.46 – 7.40 (m, 1H), 7.41 – 7.34 (m, 1H), 7.34 – 7.26 (m, 1H), 3.14 (dd,  $J = 17.2, 8.0$  Hz, 0.35H), 3.06 (dd,  $J = 17.1, 8.0$  Hz, 0.65H), 2.92 – 2.85 (m, 1H), 2.82 (dt,  $J = 8.0, 4.0$  Hz, 0.63H), 2.75 (dt,  $J = 8.1, 4.0$  Hz, 0.34H), 2.35 – 2.27 (m, 0.66H), 2.23 – 2.15 (m, 0.33H), 1.40 – 1.13 (m, 10H), 0.99 (d,  $J = 7.0$  Hz, 1H), 0.92 – 0.82 (m, 3H), 0.70 (d,  $J = 6.8$  Hz, 2H).  $^{13}\text{C}$  NMR (101 MHz,  $\text{CDCl}_3$ )  $\delta$  208.39, 208.36, 207.80, 207.78, 163.45, 161.00, 160.99, 149.68, 149.66, 149.44, 149.42, 139.48, 139.42, 139.41, 139.35, 127.85, 127.81, 127.77, 127.73, 122.28, 122.24, 122.05, 122.00, 109.45, 109.43, 109.24, 109.22, 53.77, 52.46, 35.28, 34.47, 33.56, 32.29, 31.85, 31.79, 29.39, 28.67, 27.56, 27.33, 27.03, 22.64, 22.59, 17.64, 14.61, 14.09, 14.05. IR(KBr) 2957, 2927, 2855, 1714, 1486, 1466, 1290, 1264  $\text{cm}^{-1}$ . HRMS: calcd.  $\text{C}_{17}\text{H}_{24}\text{FO}$   $[\text{M}+\text{H}]^+$ : 263.1806. Found: 263.1802.

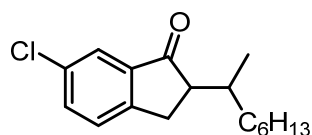

**6-chloro-2-(octan-2-yl)-2,3-dihydro-1H-inden-1-one 4f:** Synthesized from 6-chloro-1-indanone and 1-octene by following general procedure B on a 0.2 mmol scale of **L1**. 31 mg obtained. TON (based on iridium) = 28. Isolated as a mixture with dr: 1.5:1. Colorless liquid.  $R_f = 0.4$  (Hex:Et<sub>2</sub>O=10:1).  $^1\text{H}$  NMR

(500 MHz, CDCl<sub>3</sub>)  $\delta$  7.66 – 7.63 (m, 1H), 7.58 – 7.56 (m, 1H), 7.33 (t,  $J$  = 7.7 Hz, 1H), 3.18 (dd,  $J$  = 17.9, 8.2 Hz, 0.4H), 3.09 (dd,  $J$  = 17.9, 8.1 Hz, 0.6H), 2.92 – 2.85 (m, 1H), 2.81 (dt,  $J$  = 8.1, 4.0 Hz, 0.6H), 2.73 (dt,  $J$  = 8.2, 4.1 Hz, 0.4H), 2.39 – 2.29 (m, 0.6H), 2.25 – 2.18 (m, 0.4H), 1.42 – 1.16 (m, 10H), 1.02 (d,  $J$  = 6.9 Hz, 1.2H), 0.93 – 0.80 (m, 3H), 0.71 (d,  $J$  = 6.8 Hz, 1.8H). <sup>13</sup>C NMR (101 MHz, CDCl<sub>3</sub>)  $\delta$  208.39, 207.80, 151.88, 151.66, 139.65, 139.60, 134.15, 134.12, 132.82, 132.77, 128.80, 121.85, 121.83, 52.88, 51.53, 35.28, 34.42, 33.54, 32.25, 31.86, 31.79, 29.39, 28.28, 27.56, 27.35, 26.69, 22.65, 22.59, 17.66, 14.61, 14.09, 14.05. IR(KBr) 2957, 2926, 2855, 1718, 1599, 1460, 1260, 1130 cm<sup>-1</sup>. HRMS: calcd. C<sub>17</sub>H<sub>24</sub>ClO [M+H]<sup>+</sup>: 279.1510. Found: 279.1505.

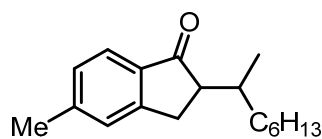

**5-methyl-2-(octan-2-yl)-2,3-dihydro-1H-inden-1-one 4g:** Synthesized from 5-methyl-1-indanone and 1-octene by following general procedure B on a 0.2 mmol scale of **L1**. 25 mg obtained. TON (based on iridium) = 24. Or synthesized from 5-methyl-1-indanone and 1-octene by following general procedure D on a 0.2 mmol scale of 5-methyl-1-indanone. Yield = 36%. Isolated as a mixture with dr: 1.5:1. Colorless liquid.  $R_f$  = 0.3 (Hex:Et<sub>2</sub>O=10:1). <sup>1</sup>H NMR (500 MHz, CDCl<sub>3</sub>)  $\delta$  7.66 – 7.60 (m, 1H), 7.27 – 7.25 (m, 1H), 7.16 (d,  $J$  = 7.8 Hz, 1H), 3.11 (dd,  $J$  = 17.4, 8.1 Hz, 0.4H), 3.03 (dd,  $J$  = 17.3, 8.1 Hz, 0.6H), 2.92 – 2.83 (m, 1H), 2.76 (dt,  $J$  = 8.0, 4.0 Hz, 0.6H), 2.68 (dt,  $J$  = 8.1, 4.0 Hz, 0.4H), 2.43 (s, 3H), 2.35 – 2.26 (m, 0.6H), 2.24 – 2.15 (m, 0.4H), 1.41 – 1.10 (m, 10H), 0.99 (d,  $J$  = 6.9 Hz, 1.2H), 0.92 – 0.81 (m, 3H), 0.69 (d,  $J$  = 6.8 Hz, 1.8H). <sup>13</sup>C NMR (101 MHz, CDCl<sub>3</sub>)  $\delta$  208.90, 208.33, 154.90, 154.66, 145.61, 145.55, 135.57, 135.52, 128.46, 126.82, 126.78, 123.41, 123.39, 53.02, 51.62, 35.42, 34.38, 33.47, 32.14, 31.87, 31.82, 29.44, 28.94, 27.61, 27.37, 27.34, 22.66, 22.60, 22.05, 17.76, 14.51, 14.10, 14.06. IR(KBr) 2956, 2925, 2855, 1709, 1611, 1460, 1325, 1278 cm<sup>-1</sup>. HRMS: calcd. C<sub>18</sub>H<sub>27</sub>O [M+H]<sup>+</sup>: 259.2056. Found: 259.2059.

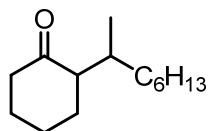

**2-(octan-2-yl)cyclohexan-1-one 4h:**<sup>11</sup> Synthesized from cyclohexanone and 1-octene by following general procedure A on a 0.2 mmol scale of **L1**, and followed with hydrolysis with 0.5 mL of toluene

and 0.5 mL of HCl (6 M) at 110 °C for 1 h. 12 mg obtained. TON (based on iridium) = 14. Isolated as a mixture with dr: 1.3:1. Colorless liquid.  $R_f = 0.32$  (Hex:Et<sub>2</sub>O=20:1). <sup>1</sup>H NMR (500 MHz, CDCl<sub>3</sub>) δ 2.41 – 2.33 (m, 1H), 2.30 – 2.10 (m, 2H), 2.08 – 1.82 (m, 4H), 1.78 – 1.60 (m, 2H), 1.58 – 1.48 (m, 1H), 1.42 – 1.00 (m, 10H), 0.90 – 0.80 (m, 6H). <sup>13</sup>C NMR (101 MHz, CDCl<sub>3</sub>) δ 213.40, 213.34, 56.41, 55.28, 42.07, 42.02, 34.83, 33.13, 31.90, 31.87, 31.36, 30.73, 29.63, 29.49, 29.18, 27.94, 27.75, 27.57, 27.34, 27.17, 24.50, 24.30, 22.68, 22.66, 17.47, 16.02, 14.10.

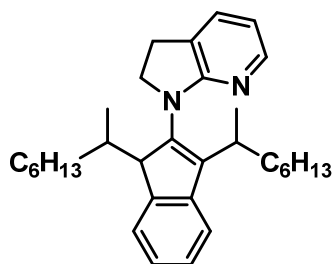

**1-(1,3-di(octan-2-yl)-1H-inden-2-yl)-2,3-dihydro-1H-pyrrolo[2,3-b]pyridine 6:** Synthesized from 1-(1H-inden-2-yl)-2,3-dihydro-1H-pyrrolo[2,3-b]pyridine **5** and 1-octene with the following procedure: A 4-mL vial charged with a stir bar and **5** (46.8 mg, 0.2 mmol) was loosely capped and was transferred into a glove box. Another 4-mL vial charged with a stir bar and *rac*-BINAP (6.2 mg, 0.01 mmol) was loosely capped and was transferred into the glove box. To this vial was added [Ir(COD)<sub>2</sub>]BARF (12.7 mg, 0.01 mmol) and 0.2 mL of toluene. This mixture was stirred for 10 min at 50 °C before it was transferred to the first vial. The vial was tightly capped, removed from the glove box and heated at 130 °C for 48 h. After the completion of the reaction, the mixture was cooled to room temperature, diluted with ethyl acetate and passed through a short pad of silica gel. After concentration in vacuum, the crude mixture was subjected to <sup>1</sup>H NMR to determine the dr ratio and the NMR yield by using tetrachloroethane as internal standard. The crude mixture was then subjected to flash chromatography (silica gel, Hexane/Et<sub>2</sub>O=25:1 to 10:1) to give the desired products. Three major diastereomers were observed with a 1.2:1.1:1 ratio. Two of them were isolated and characterized. **diastereomer 1:** Light yellow liquid. 21 mg,  $R_f = 0.40$  (Hex:Et<sub>2</sub>O=20:1). <sup>1</sup>H NMR (500 MHz, CDCl<sub>3</sub>) δ 7.84 (d,  $J = 5.2$  Hz, 1H), 7.41 (d,  $J = 7.6$  Hz, 1H), 7.31 (d,  $J = 7.4$  Hz, 1H), 7.24 (d,  $J = 7.0$  Hz, 1H), 7.19 (t,  $J = 7.5$  Hz, 1H), 7.07 (t,  $J = 7.4$  Hz, 1H), 6.51 – 6.45 (m, 1H), 4.43 (d,  $J = 2.6$  Hz, 1H), 4.17 (td,  $J = 9.9, 6.8$  Hz, 1H), 3.74 (q,  $J = 9.0$  Hz, 1H), 3.22 – 3.06 (m, 2H), 2.98 – 2.88 (m, 1H), 1.94 – 1.71 (m, 3H), 1.69 – 1.60 (m, 1H), 1.50 – 1.15 (m, 20H), 0.90 – 0.83 (m, 6H), 0.43 (d,  $J = 6.7$  Hz, 3H). <sup>13</sup>C NMR (101 MHz, CDCl<sub>3</sub>) δ 161.92, 146.27, 144.08, 143.39, 143.35, 138.50, 131.06, 125.61, 123.94, 123.42, 122.42, 120.60, 112.92, 51.55, 50.29,

36.13, 34.92, 33.27, 32.56, 31.88, 31.87, 29.70, 29.30, 28.67, 27.71, 26.50, 22.67, 22.66, 19.05, 14.60, 14.11, 14.09. IR(KBr) 2956, 2927, 2855, 1605, 1486, 1461, 1433, 1378, 1325, 1248  $\text{cm}^{-1}$ . HRMS: calcd.  $\text{C}_{32}\text{H}_{47}\text{N}_2$   $[\text{M}+\text{H}]^+$ : 459.3734. Found: 459.3732. **diastereomer 2**: Light yellow liquid. 14 mg obtained.  $^1\text{H}$  NMR (500 MHz,  $\text{CDCl}_3$ )  $\delta$  7.83 (dd,  $J = 5.3, 1.5$  Hz, 1H), 7.42 (d,  $J = 7.6$  Hz, 1H), 7.35 (d,  $J = 7.4$  Hz, 1H), 7.24 (d,  $J = 7.1$  Hz, 1H), 7.18 (t,  $J = 7.4$  Hz, 1H), 7.09 (t,  $J = 7.4$  Hz, 1H), 6.48 (dd,  $J = 7.0, 5.3$  Hz, 1H), 4.30 (d,  $J = 2.7$  Hz, 1H), 4.16 (td,  $J = 9.8, 7.3$  Hz, 1H), 3.73 (td,  $J = 9.8, 6.9$  Hz, 1H), 3.15 (qt,  $J = 15.6, 8.3$  Hz, 2H), 2.92 (q,  $J = 7.3$  Hz, 1H), 1.94 – 1.84 (m, 2H), 1.78 – 1.69 (m, 1H), 1.48 – 1.38 (m, 1H), 1.33 – 1.17 (m, 14H), 1.14 – 0.99 (m, 9H), 0.87 – 0.79 (m, 6H).  $^{13}\text{C}$  NMR (101 MHz,  $\text{CDCl}_3$ )  $\delta$  162.06, 146.30, 144.52, 143.62, 142.81, 139.43, 131.01, 125.55, 123.64, 123.62, 122.33, 120.66, 112.73, 52.32, 51.44, 34.96, 34.57, 32.55, 31.91, 31.82, 31.31, 29.75, 29.52, 28.71, 28.04, 26.48, 22.68, 22.61, 19.17, 18.58, 14.09, 14.04. IR(KBr) 2957, 2927, 2855, 1605, 1461, 1433, 1377, 1325  $\text{cm}^{-1}$ . HRMS: calcd.  $\text{C}_{32}\text{H}_{47}\text{N}_2$   $[\text{M}+\text{H}]^+$ : 459.3734. Found: 459.3732.

### Synthesis of 5-ethyl-2,3-dihydro-1H-pyrrolo[2,3-b]pyridine L5:

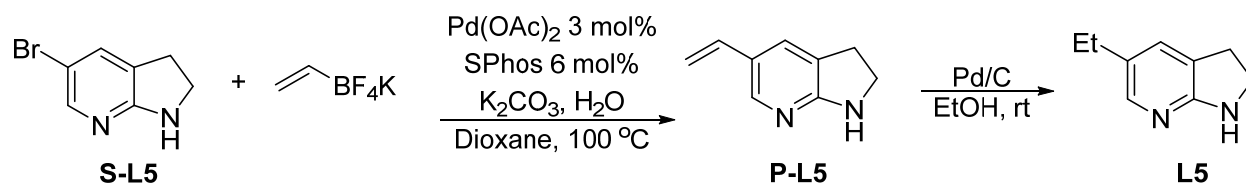

To a 20 mL vial with a stir bar was added  $\text{Pd}(\text{OAc})_2$  (33.6 mg, 0.15 mmol), SPhos (123 mg, 0.3 mmol),  $\text{K}_2\text{CO}_3$  (1.38 g, 10 mmol), 5-bromo-2,3-dihydro-1H-pyrrolo[2,3-b]pyridine (**S-L5**) (1.0 g, 5 mmol), potassium vinyltrifluoroborate (1.0 g, 7.5 mmol), dioxane (6 mL) and  $\text{H}_2\text{O}$  (2 mL). The reaction mixture was heated at 100  $^\circ\text{C}$  for 3 h. The mixture was cooled to room temperature, passed through a short pad of Celite and further washed with EtOAc. The water layer of the filtrate was removed. The organic layer was dried and concentrated in vacuum. The obtained crude product **P-L5** was directly used for the next step.

The crude product **P-L5** obtained above was dissolved in 10 mL of EtOH and Pd/C (180 mg) was then added. The reaction mixture was stirred under 1 atm of  $\text{H}_2$  (balloon) for 2 h. After completion, the reaction mixture as passed through a short pad of Celite and further washed with EtOH. After concentrated in vacuum, the crude mixture was subject to column chromatography (Hexane:EtOAc=1:1

to 0:1) to obtain the desired pure product (**L5**) as a light yellow solid. Yield for 2 steps: 68%. M.p. 114–116 °C. <sup>1</sup>H NMR (500 MHz, CDCl<sub>3</sub>) δ 7.64 (s, 1H), 7.12 (s, 1H), 4.42 (br, 1H), 3.57 (t, *J* = 8.3 Hz, 2H), 3.01 (tt, *J* = 8.4, 1.2 Hz, 2H), 2.46 (q, *J* = 7.6 Hz, 2H), 1.16 (t, *J* = 7.6 Hz, 3H). <sup>13</sup>C NMR (101 MHz, CDCl<sub>3</sub>) δ 163.20, 144.39, 131.68, 128.90, 121.80, 44.63, 27.79, 25.56, 15.98. IR(KBr) 3201, 3166, 2958, 2926, 2360, 2341, 1592, 1512, 1436, 1408, 1263 cm<sup>-1</sup>. HRMS: calcd. C<sub>9</sub>H<sub>13</sub>N<sub>2</sub> [M+H]<sup>+</sup>: 149.1073. Found: 149.1074.

### Synthesis of 2,3-dihydro-1H-pyrrolo[2,3-c]isoquinoline **L6**:

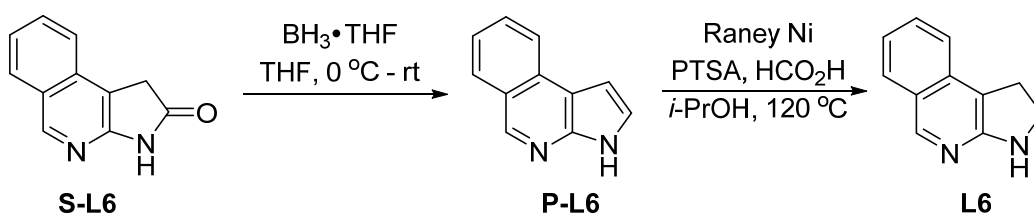

1,3-dihydro-2H-pyrrolo[2,3-c]isoquinolin-2-one (**S-L6**) was synthesized by following the literature procedure.<sup>14</sup> To a solution of 1,3-dihydro-2H-pyrrolo[2,3-c]isoquinolin-2-one (**S-L6**) (920 mg, 5.0 mmol) in 25 mL of THF at 0 °C was added a solution of BH<sub>3</sub>/THF (1.0 M) (20 mL, 20 mmol). The reaction mixture was then warmed to room temperature and stirred for 2 h before 30 mL of 6 M HCl solution was added slowly. The resulted mixture was then stirred at 110 °C for another 2 h. After cooled to room temperature, aqueous NaOH solution (10%) was added till pH = 9. The resulting solution was extracted with EtOAc (50 mL × 3) and then dried over MgSO<sub>4</sub>. The mixture was concentrated in vacuum and the crude product was purified by column chromatography (EtOAc:CH<sub>2</sub>Cl<sub>2</sub>=1:2 to 1:1) to give **P-L6** as the major product (470 mg, 56% yield) and **L6** as the minor product (85 mg, 10% yield).

To a solution of **P-L6** (340 mg, 2 mmol) in *i*PrOH (10 mL) was added Raney Nickel (3 mL of aqueous solution), PTSA (390 mg, 2.1 mmol) and HCO<sub>2</sub>H (1.12 mL, 30 mmol). The reaction mixture was sealed and stirred at 120 °C for 12 h. The mixture was cooled to room temperature, passed through a short pad of Celite and washed with *i*PrOH. The filtrate was concentrated in vacuum and was further purified by column chromatography (EtOAc:CH<sub>2</sub>Cl<sub>2</sub>=1:2 to 1:1) to give **L6** as a yellow solid (163 mg, 48% yield). M.p. 118–120 °C. <sup>1</sup>H NMR (500 MHz, CDCl<sub>3</sub>) δ 8.72 (s, 1H), 7.79 (dd, *J* = 8.3, 1.1 Hz, 1H), 7.53 – 7.45 (m, 2H), 7.20 (ddd, *J* = 8.1, 6.5, 1.4 Hz, 1H), 4.38 (br, 1H), 3.77 (td, *J* = 8.7, 2.0 Hz, 2H), 3.33 (t, *J* = 8.7 Hz, 2H). <sup>13</sup>C NMR (101 MHz, CDCl<sub>3</sub>) δ 160.97, 150.71, 134.59, 130.36, 128.67, 124.09, 122.26, 121.55,

110.75, 45.29, 26.75. IR(KBr) 3205, 2864, 1628, 1582, 1562, 1525, 1372, 1294, 1155  $\text{cm}^{-1}$ . HRMS: calcd.  $\text{C}_{11}\text{H}_{11}\text{N}_2$   $[\text{M}+\text{H}]^+$ : 171.0917. Found: 171.0918.

GC standard curve of **3a** with dodecane as the internal standard:

|   | m pro (mg) | m dode (mg) | Mole of pro | Mole of dode | Mole (dode) / Mole (pro) | GC area dode | GC area <b>5a</b> (dr 1) | GC area <b>5a</b> (dr 2) | y = area dode / area pro |
|---|------------|-------------|-------------|--------------|--------------------------|--------------|--------------------------|--------------------------|--------------------------|
| 0 | 0          | 0           | 0           | 0            | 0                        | 0            | 0                        | 0                        | 0                        |
| 1 | 10.3       | 8.5         | 0.052551    | 0.05         | 0.951456311              | 30240        | 10518.5                  | 15773                    | 1.150181618              |
| 2 | 10.2       | 17.6        | 0.0520408   | 0.1035294    | 1.989388697              | 56179        | 9573.6                   | 14350.5                  | 2.348217906              |
| 3 | 10.3       | 25.8        | 0.052551    | 0.1517647    | 2.887949743              | 73432        | 8299                     | 12425                    | 3.543331403              |
| 4 | 10.3       | 34.6        | 0.052551    | 0.2035294    | 3.872986865              | 83866        | 6935.5                   | 10393                    | 4.839772629              |
| 5 | 10.4       | 84.2        | 0.0530612   | 0.4952941    | 9.33438914               | 213650       | 7782                     | 11653                    | 10.99305377              |

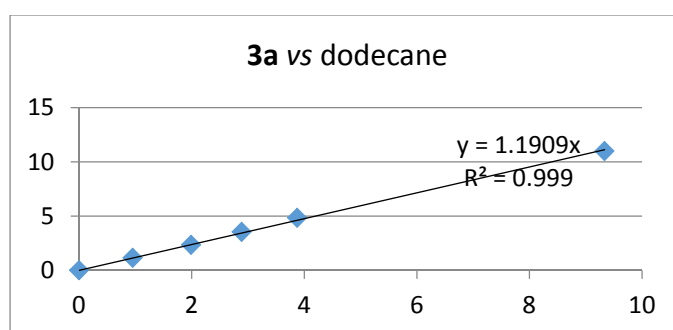

### 3. Synthesis of the Ir–H Complex **7** and the X-Ray Data of **7**

Synthesis of Ir–H complex **7**:

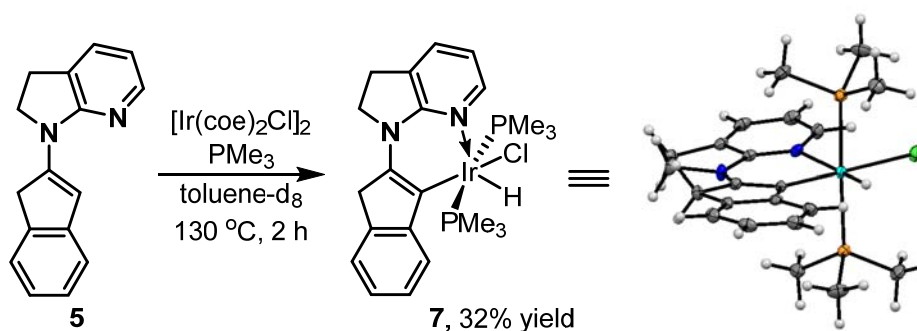

Substrate **5** (12 mg, 0.05 mmol) and  $[\text{Ir}(\text{coe})_2\text{Cl}]_2$  (22.4 mg, 0.025 mmol, 0.5 equiv) were added to a J-Young tube in a glove box, followed by the addition of  $\text{d}_8$ -toluene (600  $\mu\text{L}$ ) and  $\text{PMe}_3$  (7.6 mg, 10  $\mu\text{L}$ , 0.1 mmol, 2 equiv). The J-Young tube was sealed and heated at 130  $^\circ\text{C}$  for 2 hours. After cooling, the reaction was subjected to  $^1\text{H}$  NMR analysis, which showed about half conversion. The reaction mixture

was purified by flash chromatography (silica gel) in the glove box by using Hexane/Et<sub>2</sub>O 3:1 to give 9 mg of desired product, yield 32%. Single crystal structure was obtained by dissolving the product in 500  $\mu$ L of d<sub>8</sub>-toluene in an NMR tube with slow evaporating in the glove box. <sup>1</sup>H NMR (500 MHz, Toluene-*d*<sub>8</sub>)  $\delta$  9.60 (d, *J* = 5.9 Hz, 1H), 7.80 (d, *J* = 7.6 Hz, 1H), 7.38 (td, *J* = 7.5, 1.2 Hz, 1H), 7.25 (d, *J* = 7.1 Hz, 1H), 7.04 – 7.00 (m, 1H), 6.62 (dq, *J* = 6.8, 1.5 Hz, 1H), 6.06 (t, *J* = 6.5 Hz, 1H), 3.34 (t, *J* = 8.7 Hz, 2H), 3.11 (t, *J* = 2.7 Hz, 2H), 2.30 (t, *J* = 8.7 Hz, 2H), 1.11 (t, *J* = 3.5 Hz, 18H), –19.89 (t, *J* = 17.3 Hz, 1H).

### X-Ray Data of 7:

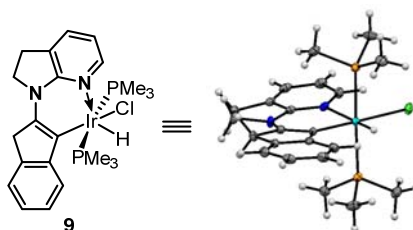

|                        |                                            |                                 |               |
|------------------------|--------------------------------------------|---------------------------------|---------------|
| Bond precision:        | C-C = 0.0040 Å                             | Wavelength=0.71073              |               |
| Cell:                  | a=12.8120(9)                               | b=12.1811(8)                    | c=15.4969(10) |
|                        | alpha=90                                   | beta=107.511(1)                 | gamma=90      |
| Temperature:           | 100 K                                      |                                 |               |
|                        | Calculated                                 | Reported                        |               |
| Volume                 | 2306.4(3)                                  | 2306.4(3)                       |               |
| Space group            | P 21/n                                     | P 1 21/n 1                      |               |
| Hall group             | -P 2yn                                     | -P 2yn                          |               |
| Moiety formula         | C22 H32 Cl Ir N2 P2                        | C22 H32 Cl Ir N2 P2             |               |
| Sum formula            | C22 H32 Cl Ir N2 P2                        | C22 H32 Cl Ir N2 P2             |               |
| Mr                     | 614.11                                     | 614.08                          |               |
| Dx, g cm <sup>-3</sup> | 1.769                                      | 1.768                           |               |
| Z                      | 4                                          | 4                               |               |
| Mu (mm <sup>-1</sup> ) | 6.054                                      | 6.054                           |               |
| F000                   | 1208.0                                     | 1208.0                          |               |
| F000'                  | 1204.13                                    |                                 |               |
| h, k, lmax             | 18, 17, 22                                 | 18, 17, 22                      |               |
| Nref                   | 6972                                       | 6424                            |               |
| Tmin, Tmax             | 0.551, 0.616                               | 0.424, 0.746                    |               |
| Tmin'                  | 0.540                                      |                                 |               |
| Correction method=     | # Reported T Limits: Tmin=0.424 Tmax=0.746 |                                 |               |
| AbsCorr =              | MULTI-SCAN                                 |                                 |               |
| Data completeness=     | 0.921                                      | Theta(max)= 30.396              |               |
| R(reflections)=        | 0.0241( 5793)                              | wR2(reflections)= 0.0539( 6424) |               |
| S =                    | 1.064                                      | Npar= 271                       |               |

## 4. Deuterium experiments:

### Deuterium experiment of *d*-1a and 2a:

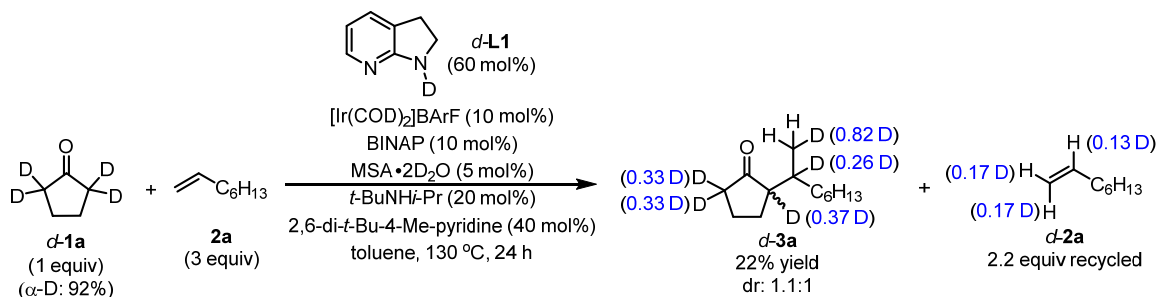

### Side-by-side reactions using 1a and *d*-1a:

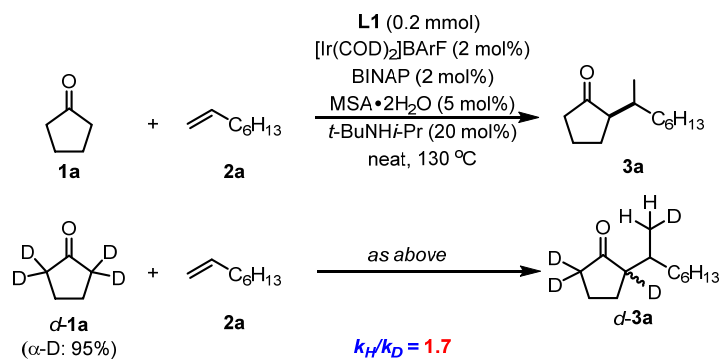

| <i>T</i><br>(h) | internal<br>standard<br>(dodecane) | <b>3a</b> (peak 1) | <b>3a</b> (peak 2) | <b>3a</b> /IS | Internal<br>standard<br>(dodecane) | <i>d</i> - <b>3a</b><br>(peak 1) | <i>d</i> - <b>3a</b><br>(peak 2) | <i>d</i> - <b>3a</b> /IS | <b>3a</b> / <i>d</i> - <b>3a</b> |
|-----------------|------------------------------------|--------------------|--------------------|---------------|------------------------------------|----------------------------------|----------------------------------|--------------------------|----------------------------------|
| 1               | 6644                               | 10.6               | 20.7               | 0.004711017   | 0                                  | 0                                | 0                                | 0                        | 0                                |
| 2               | 6382                               | 37                 | 71                 | 0.016922595   | 6619                               | 22                               | 43                               | 0.00982                  | <b>1.723241</b>                  |
| 4               | 7338                               | 340                | 650                | 0.134914146   | 7434                               | 203                              | 385                              | 0.079096                 | <b>1.7057</b>                    |
| 6               | 7644                               | 828                | 1392               | 0.290423862   | 7472                               | 438                              | 834                              | 0.170236                 | <b>1.706012</b>                  |
| 8               | 7747                               | 1210               | 1924               | 0.404543694   | 7886                               | 699                              | 1319                             | 0.255897                 | 1.580888                         |
| 10              | 9230                               | 1838               | 2781               | 0.500433369   | 7490                               | 875                              | 1627                             | 0.334045                 | 1.4981                           |
| 12              | 7925                               | 1763               | 2589               | 0.549148265   | 7853                               | 1137                             | 2079                             | 0.409525                 | 1.340939                         |
| 24              | 6764                               | 2231               | 2912               | 0.760348906   | 6954                               | 1737                             | 2812                             | 0.654156                 | 1.162336                         |



## 5. Enantioselective reaction [ $\alpha$ -alkylation of 1-indanone by using (*S*)-BINAP]:

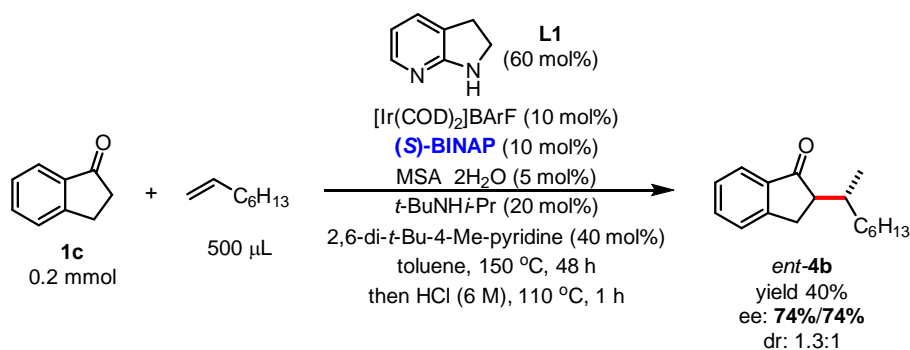

The enantio excess of compound **ent-4b** obtained by using (*S*)-BINAP as the ligand by following general procedure D was tested by chiral HPLC (Chiralpak IF, hexane:isopropanol = 99:1, 0.50 mL/min, 210 nm), first diastereomer:  $t_{\text{minor}} = 19.963$  min,  $t_{\text{major}} = 22.637$  min. at 74 % ee; second diastereomer:  $t_{\text{major}} = 23.526$  min,  $t_{\text{minor}} = 24.588$  min.

### Racemic 4b:

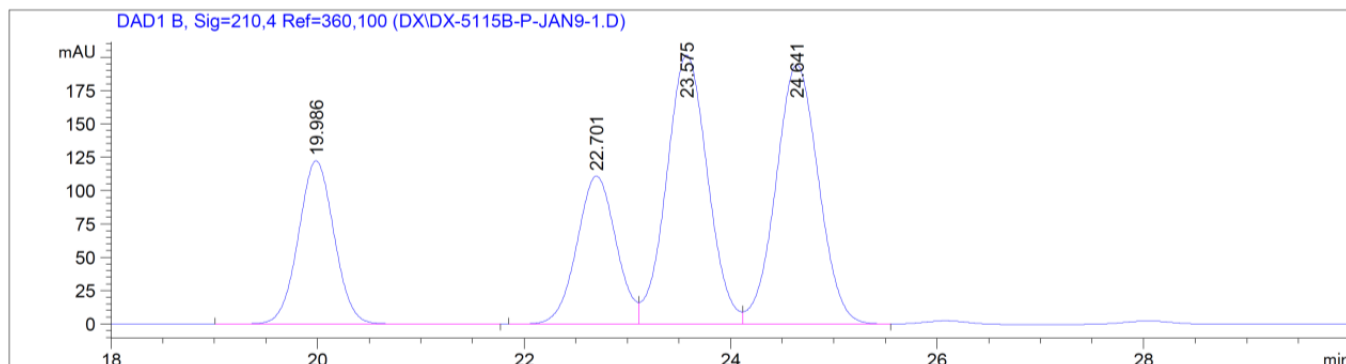

Signal 1: DAD1 B, Sig=210,4 Ref=360,100

| Peak # | RetTime [min] | Type | Width [min] | Area [mAU*s] | Height [mAU] | Area %  |
|--------|---------------|------|-------------|--------------|--------------|---------|
| 1      | 19.986        | BB   | 0.3744      | 2941.70923   | 122.37746    | 17.2767 |
| 2      | 22.701        | BV   | 0.4092      | 2923.59473   | 111.02409    | 17.1703 |
| 3      | 23.575        | VV   | 0.4327      | 5573.04932   | 201.51523    | 32.7305 |
| 4      | 24.641        | VB   | 0.4474      | 5588.71875   | 194.37410    | 32.8225 |

Totals : 1.70271e4 629.29087

### Enantiomeric 4b:

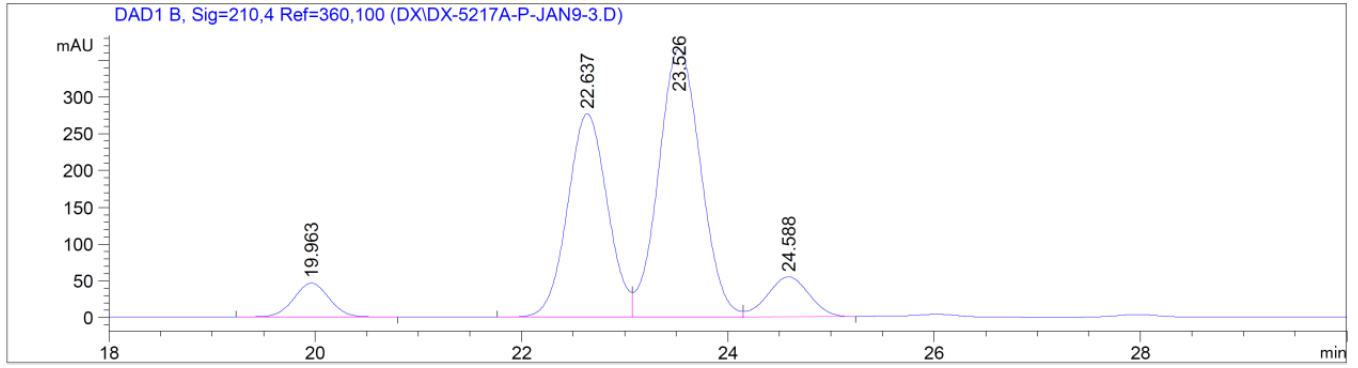

Signal 1: DAD1 B, Sig=210,4 Ref=360,100

| Peak # | RetTime [min] | Type | Width [min] | Area [mAU*s] | Height [mAU] | Area %  |
|--------|---------------|------|-------------|--------------|--------------|---------|
| 1      | 19.963        | BB   | 0.3697      | 1093.43811   | 45.92932     | 5.3677  |
| 2      | 22.637        | BV   | 0.4171      | 7422.47461   | 276.55185    | 36.4372 |
| 3      | 23.526        | VV   | 0.4425      | 1.03397e4    | 364.94901    | 50.7581 |
| 4      | 24.588        | VB   | 0.4358      | 1514.93445   | 54.25545     | 7.4369  |

Totals :                    2.03706e4    741.68562

## 6. NMR Spectra

7.26  
7.22  
7.21  
7.31  
2.31  
2.30  
2.29  
2.28  
2.27  
2.27  
2.27  
2.26  
2.26  
2.14  
2.14  
2.14  
2.13  
2.13  
2.12  
2.12  
2.11  
2.11  
2.10  
2.09  
2.09  
2.08  
2.08  
2.07  
2.07  
2.06  
2.06  
2.05  
2.05  
2.04  
2.04  
2.04  
2.04  
2.03  
2.03  
2.02  
2.02  
2.01  
2.01  
1.99  
1.99  
1.98  
1.98  
1.97  
1.96  
1.96  
1.95  
1.95  
1.94  
1.94  
1.93  
1.93  
1.93  
1.93  
1.73  
1.73  
1.72  
1.72  
1.71  
1.71  
1.70  
1.70  
1.69  
1.69  
1.68  
1.68  
1.67  
1.67  
1.66  
1.66  
1.65  
1.65  
1.64  
1.64  
1.63  
1.63  
1.30  
1.30  
1.29  
1.28  
1.28  
1.27  
1.25  
1.25  
1.22  
1.22  
1.21  
1.21  
1.19  
1.17  
1.17  
1.16  
1.16  
1.14  
1.14  
1.12  
1.12  
0.95  
0.94  
0.88  
0.87  
0.87  
0.86  
0.86  
0.85  
0.85  
0.74  
0.74  
0.73

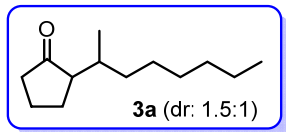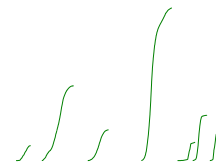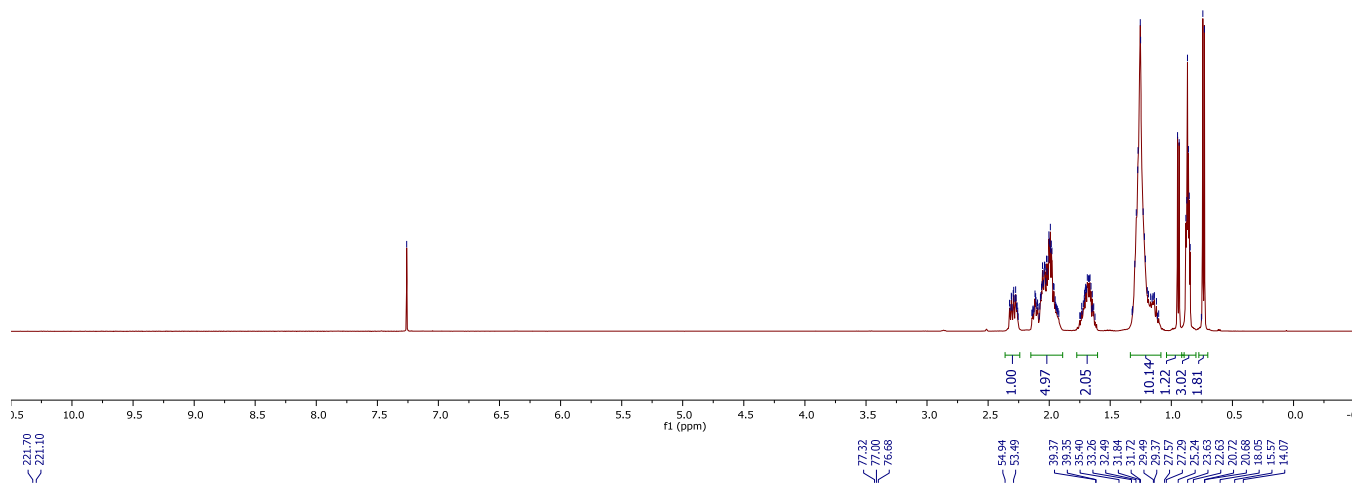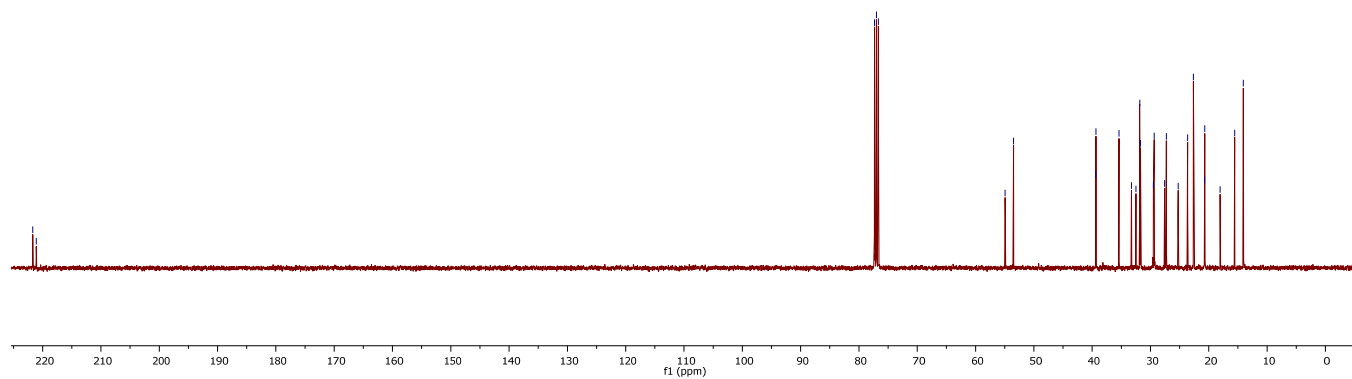



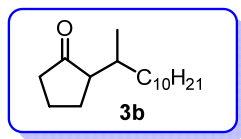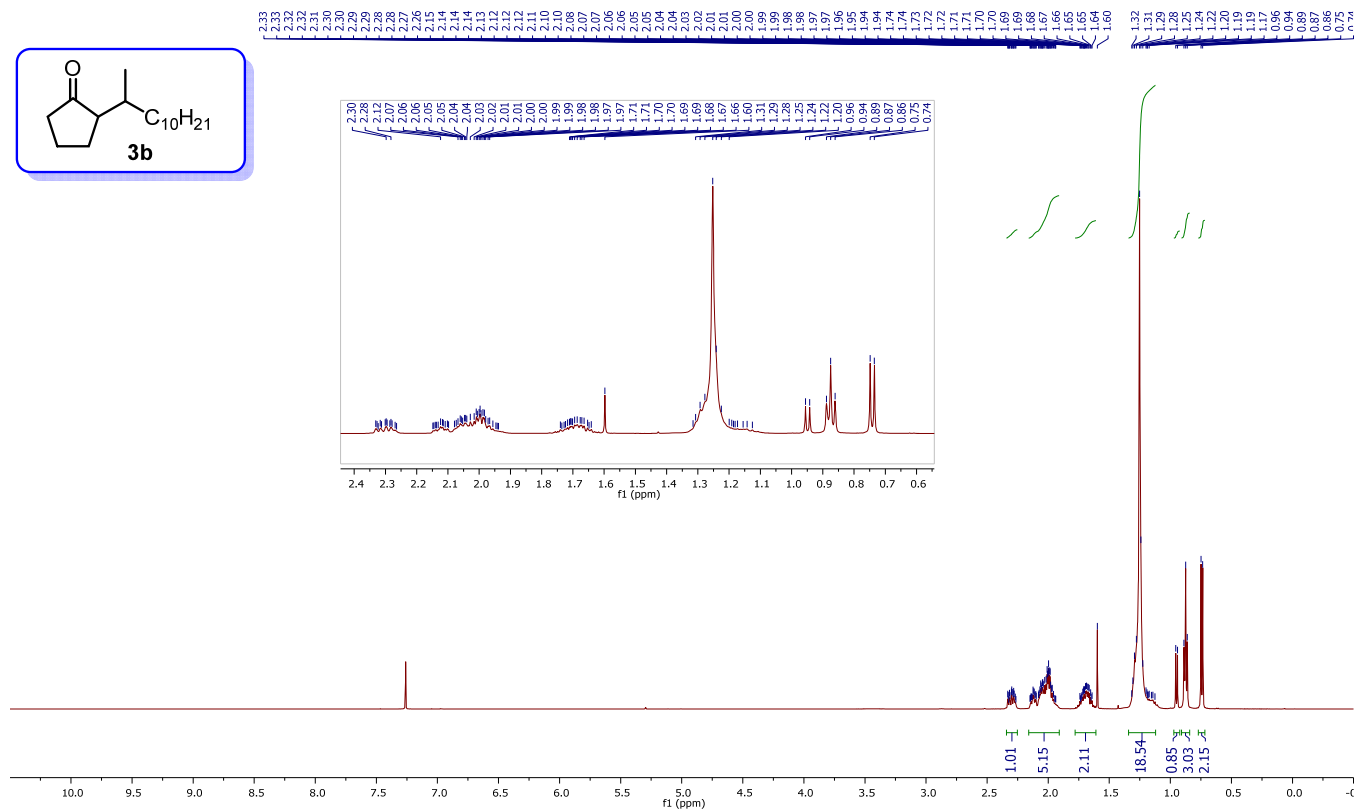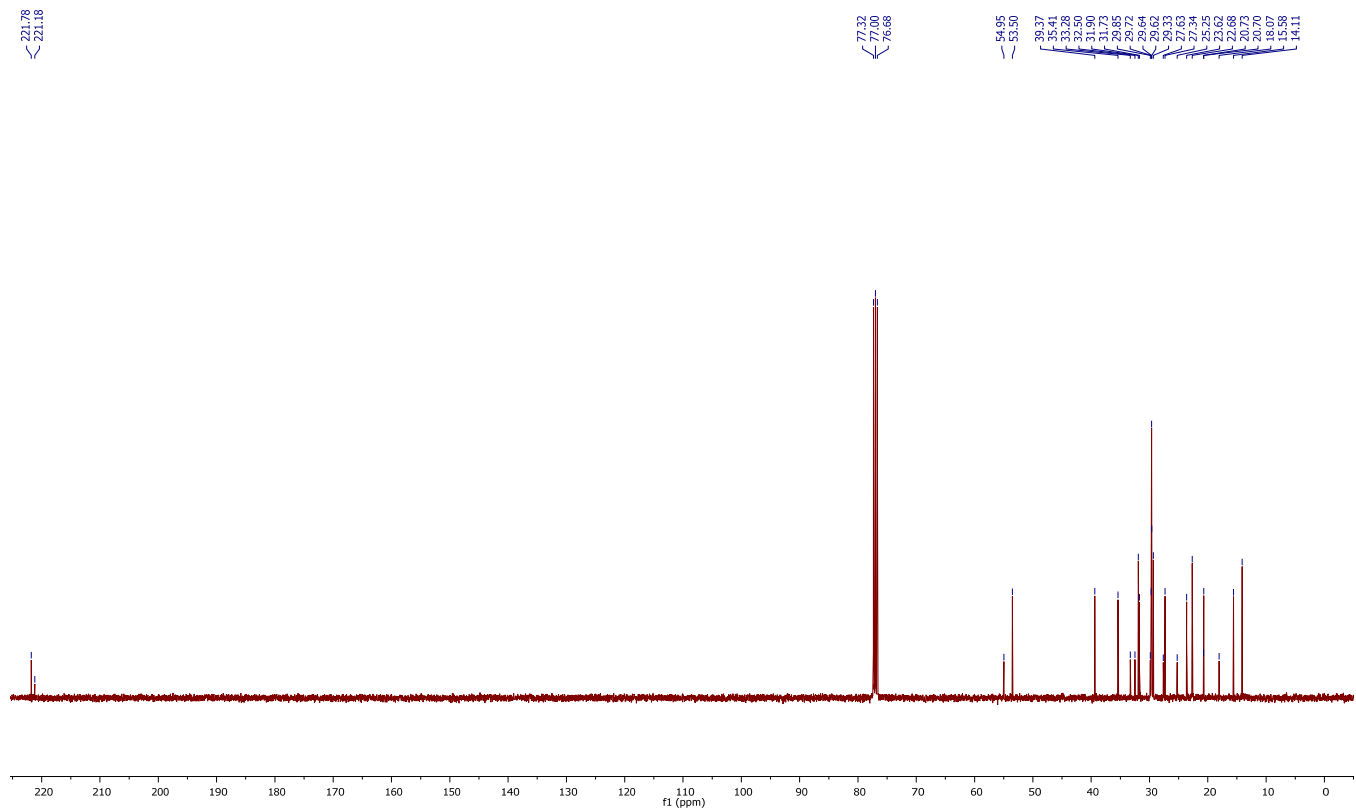





7.26  
7.25  
7.24  
7.232  
7.231  
7.230  
7.229  
7.228  
7.227  
7.226  
7.225  
7.224  
7.223  
7.222  
7.221  
7.220  
7.219  
7.218  
7.217  
7.216  
7.215  
7.214  
7.213  
7.212  
7.211  
7.210  
7.209  
7.208  
7.207  
7.206  
7.205  
7.204  
7.203  
7.202  
7.201  
7.200  
7.199  
7.198  
7.197  
7.196  
7.195  
7.194  
7.193  
7.192  
7.191  
7.190  
7.189  
7.188  
7.187  
7.186  
7.185  
7.184  
7.183  
7.182  
7.181  
7.180  
7.179  
7.178  
7.177  
7.176  
7.175  
7.174  
7.173  
7.172  
7.171  
7.170  
7.169  
7.168  
7.167  
7.166  
7.165  
7.164  
7.163  
7.162  
7.161  
7.160  
7.159  
7.158  
7.157  
7.156  
7.155  
7.154  
7.153  
7.152  
7.151  
7.150  
7.149  
7.148  
7.147  
7.146  
7.145  
7.144  
7.143  
7.142  
7.141  
7.140  
7.139  
7.138  
7.137  
7.136  
7.135  
7.134  
7.133  
7.132  
7.131  
7.130  
7.129  
7.128  
7.127  
7.126  
7.125  
7.124  
7.123  
7.122  
7.121  
7.120  
7.119  
7.118  
7.117  
7.116  
7.115  
7.114  
7.113  
7.112  
7.111  
7.110  
7.109  
7.108  
7.107  
7.106  
7.105  
7.104  
7.103  
7.102  
7.101  
7.100  
7.099  
7.098  
7.097  
7.096  
7.095  
7.094  
7.093  
7.092  
7.091  
7.090  
7.089  
7.088  
7.087  
7.086  
7.085  
7.084  
7.083  
7.082  
7.081

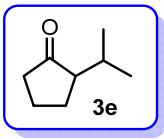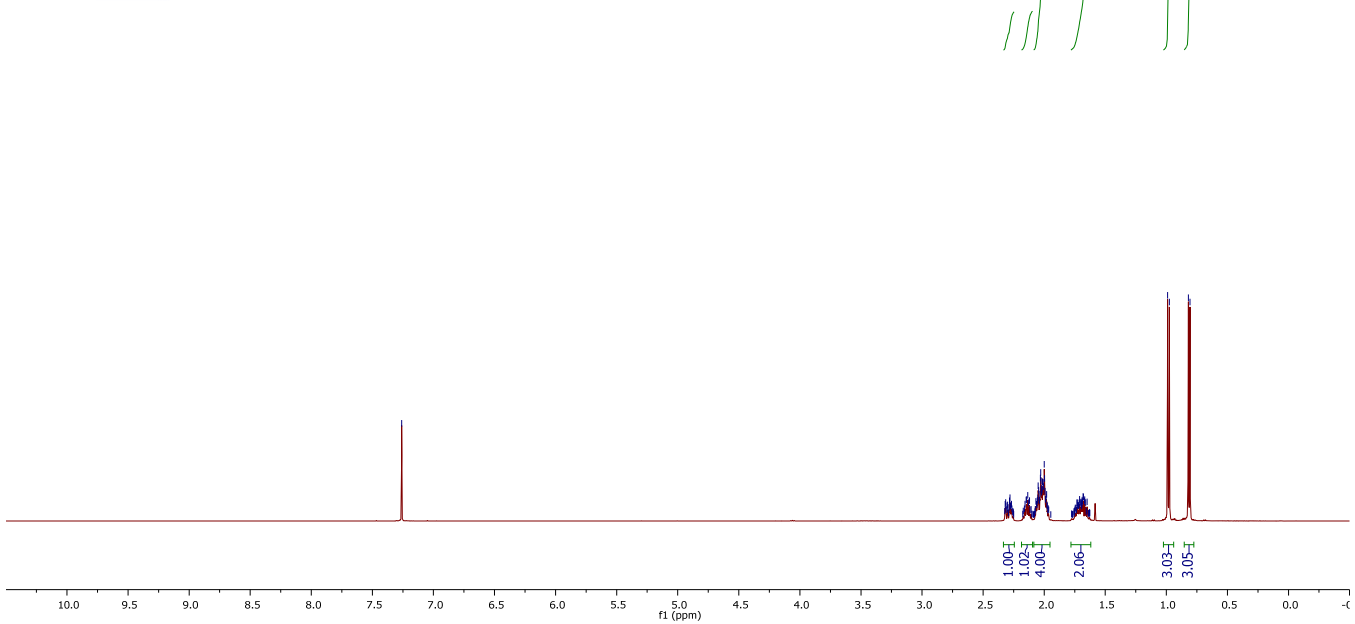

221.12  
77.32  
76.88  
55.07  
39.20  
27.27  
27.20  
21.12  
20.61  
18.40

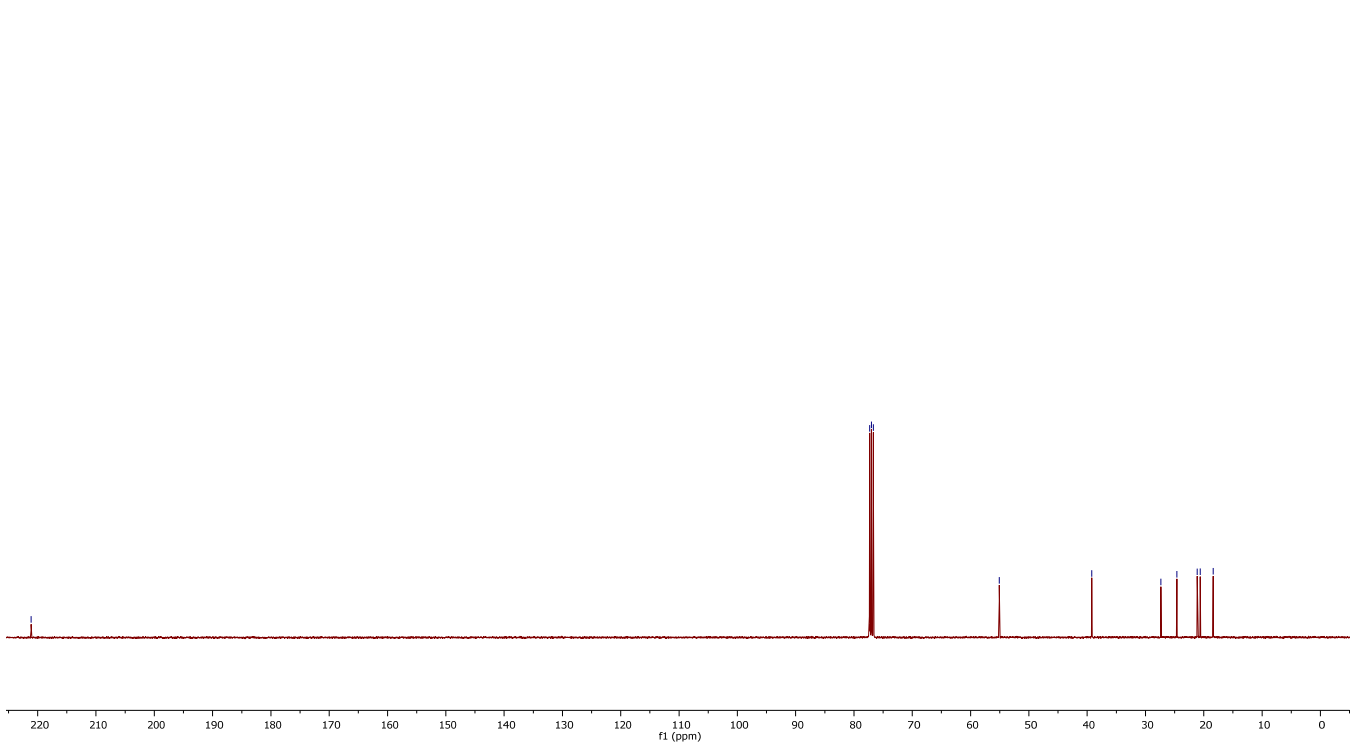



7.26  
7.25  
7.24  
7.23  
7.22  
7.21  
7.20  
7.19  
7.18  
7.17  
7.16  
7.15  
7.14  
7.13  
7.12  
7.11  
7.10  
7.09  
7.08  
7.07  
7.06  
7.05  
7.04  
7.03  
7.02  
7.01  
7.00  
6.99  
6.98  
6.97  
6.96  
6.95  
6.94  
6.93  
6.92  
6.91  
6.90  
6.89  
6.88  
6.87  
6.86  
6.85  
6.84  
6.83  
6.82  
6.81  
6.80  
6.79  
6.78  
6.77  
6.76  
6.75  
6.74  
6.73  
6.72  
6.71  
6.70  
6.69  
6.68  
6.67  
6.66  
6.65  
6.64  
6.63  
6.62  
6.61  
6.60  
6.59  
6.58  
6.57  
6.56  
6.55  
6.54  
6.53  
6.52  
6.51  
6.50  
6.49  
6.48  
6.47  
6.46  
6.45  
6.44  
6.43  
6.42  
6.41  
6.40  
6.39  
6.38  
6.37  
6.36  
6.35  
6.34  
6.33  
6.32  
6.31  
6.30  
6.29  
6.28  
6.27  
6.26  
6.25  
6.24  
6.23  
6.22  
6.21  
6.20  
6.19  
6.18  
6.17  
6.16  
6.15  
6.14  
6.13  
6.12  
6.11  
6.10  
6.09  
6.08  
6.07  
6.06  
6.05  
6.04  
6.03  
6.02  
6.01  
6.00  
5.99  
5.98  
5.97  
5.96  
5.95  
5.94  
5.93  
5.92  
5.91  
5.90  
5.89  
5.88  
5.87  
5.86  
5.85  
5.84  
5.83  
5.82  
5.81  
5.80  
5.79  
5.78  
5.77  
5.76  
5.75  
5.74  
5.73  
5.72  
5.71  
5.70  
5.69  
5.68  
5.67  
5.66  
5.65  
5.64  
5.63  
5.62  
5.61  
5.60  
5.59  
5.58  
5.57  
5.56  
5.55  
5.54  
5.53  
5.52  
5.51  
5.50  
5.49  
5.48  
5.47  
5.46  
5.45  
5.44  
5.43  
5.42  
5.41  
5.40  
5.39  
5.38  
5.37  
5.36  
5.35  
5.34  
5.33  
5.32  
5.31  
5.30  
5.29  
5.28  
5.27  
5.26  
5.25  
5.24  
5.23  
5.22  
5.21  
5.20  
5.19  
5.18  
5.17  
5.16  
5.15  
5.14  
5.13  
5.12  
5.11  
5.10  
5.09  
5.08  
5.07  
5.06  
5.05  
5.04  
5.03  
5.02  
5.01  
5.00  
4.99  
4.98  
4.97  
4.96  
4.95  
4.94  
4.93  
4.92  
4.91  
4.90  
4.89  
4.88  
4.87  
4.86  
4.85  
4.84  
4.83  
4.82  
4.81  
4.80  
4.79  
4.78  
4.77  
4.76  
4.75  
4.74  
4.73  
4.72  
4.71  
4.70  
4.69  
4.68  
4.67  
4.66  
4.65  
4.64  
4.63  
4.62  
4.61  
4.60  
4.59  
4.58  
4.57  
4.56  
4.55  
4.54  
4.53  
4.52  
4.51  
4.50  
4.49  
4.48  
4.47  
4.46  
4.45  
4.44  
4.43  
4.42  
4.41  
4.40  
4.39  
4.38  
4.37  
4.36  
4.35  
4.34  
4.33  
4.32  
4.31  
4.30  
4.29  
4.28  
4.27  
4.26  
4.25  
4.24  
4.23  
4.22  
4.21  
4.20  
4.19  
4.18  
4.17  
4.16  
4.15  
4.14  
4.13  
4.12  
4.11  
4.10  
4.09  
4.08  
4.07  
4.06  
4.05  
4.04  
4.03  
4.02  
4.01  
4.00  
3.99  
3.98  
3.97  
3.96  
3.95  
3.94  
3.93  
3.92  
3.91  
3.90  
3.89  
3.88  
3.87  
3.86  
3.85  
3.84  
3.83  
3.82  
3.81  
3.80  
3.79  
3.78  
3.77  
3.76  
3.75  
3.74  
3.73  
3.72  
3.71  
3.70  
3.69  
3.68  
3.67  
3.66  
3.65  
3.64  
3.63  
3.62  
3.61  
3.60  
3.59  
3.58  
3.57  
3.56  
3.55  
3.54  
3.53  
3.52  
3.51  
3.50  
3.49  
3.48  
3.47  
3.46  
3.45  
3.44  
3.43  
3.42  
3.41  
3.40  
3.39  
3.38  
3.37  
3.36  
3.35  
3.34  
3.33  
3.32  
3.31  
3.30  
3.29  
3.28  
3.27  
3.26  
3.25  
3.24  
3.23  
3.22  
3.21  
3.20  
3.19  
3.18  
3.17  
3.16  
3.15  
3.14  
3.13  
3.12  
3.11  
3.10  
3.09  
3.08  
3.07  
3.06  
3.05  
3.04  
3.03  
3.02  
3.01  
3.00  
2.99  
2.98  
2.97  
2.96  
2.95  
2.94  
2.93  
2.92  
2.91  
2.90  
2.89  
2.88  
2.87  
2.86  
2.85  
2.84  
2.83  
2.82  
2.81  
2.80  
2.79  
2.78  
2.77  
2.76  
2.75  
2.74  
2.73  
2.72  
2.71  
2.70  
2.69  
2.68  
2.67  
2.66  
2.65  
2.64  
2.63  
2.62  
2.61  
2.60  
2.59  
2.58  
2.57  
2.56  
2.55  
2.54  
2.53  
2.52  
2.51  
2.50  
2.49  
2.48  
2.47  
2.46  
2.45  
2.44  
2.43  
2.42  
2.41  
2.40  
2.39  
2.38  
2.37  
2.36  
2.35  
2.34  
2.33  
2.32  
2.31  
2.30  
2.29  
2.28  
2.27  
2.26  
2.25  
2.24  
2.23  
2.22  
2.21  
2.20  
2.19  
2.18  
2.17  
2.16  
2.15  
2.14  
2.13  
2.12  
2.11  
2.10  
2.09  
2.08  
2.07  
2.06  
2.05  
2.04  
2.03  
2.02  
2.01  
2.00  
1.99  
1.98  
1.97  
1.96  
1.95  
1.94  
1.93  
1.92  
1.91  
1.90  
1.89  
1.88  
1.87  
1.86  
1.85  
1.84  
1.83  
1.82  
1.81  
1.80  
1.79  
1.78  
1.77  
1.76  
1.75  
1.74  
1.73  
1.72  
1.71  
1.70  
1.69  
1.68  
1.67  
1.66  
1.65  
1.64  
1.63  
1.62  
1.61  
1.60  
1.59  
1.58  
1.57  
1.56  
1.55  
1.54  
1.53  
1.52  
1.51  
1.50  
1.49  
1.48  
1.47  
1.46  
1.45  
1.44  
1.43  
1.42  
1.41  
1.40  
1.39  
1.38  
1.37  
1.36  
1.35  
1.34  
1.33  
1.32  
1.31  
1.30  
1.29  
1.28  
1.27  
1.26  
1.25  
1.24  
1.23  
1.22  
1.21  
1.20  
1.19  
1.18  
1.17  
1.16  
1.15  
1.14  
1.13  
1.12  
1.11  
1.10  
1.09  
1.08  
1.07  
1.06  
1.05  
1.04  
1.03  
1.02  
1.01  
1.00  
0.99  
0.98  
0.97  
0.96  
0.95  
0.94  
0.93  
0.92  
0.91  
0.90  
0.89  
0.88  
0.87  
0.86  
0.85  
0.84  
0.83  
0.82  
0.81  
0.80  
0.79  
0.78  
0.77  
0.76  
0.75  
0.74  
0.73  
0.72  
0.71

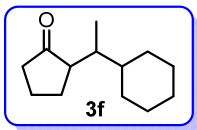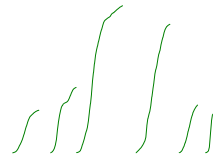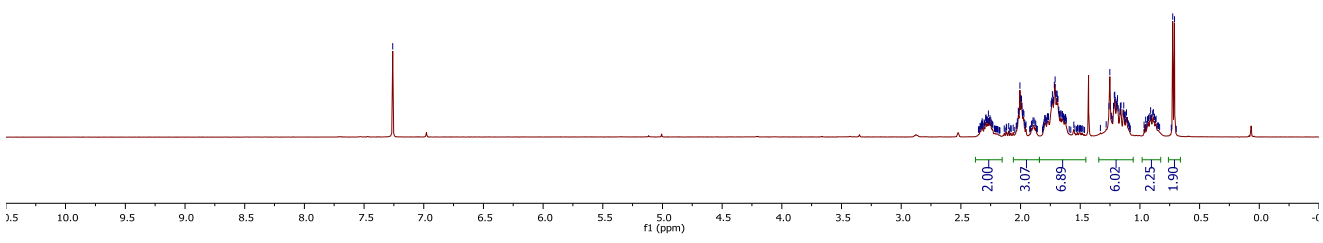

222.50  
221.69

77.32  
77.00  
76.68

51.51  
49.44  
39.26  
38.22  
37.71  
35.97  
33.42  
33.16  
31.01  
29.90  
27.08  
26.67  
26.62  
26.49  
26.49  
26.37  
26.34  
24.04  
20.74  
13.21

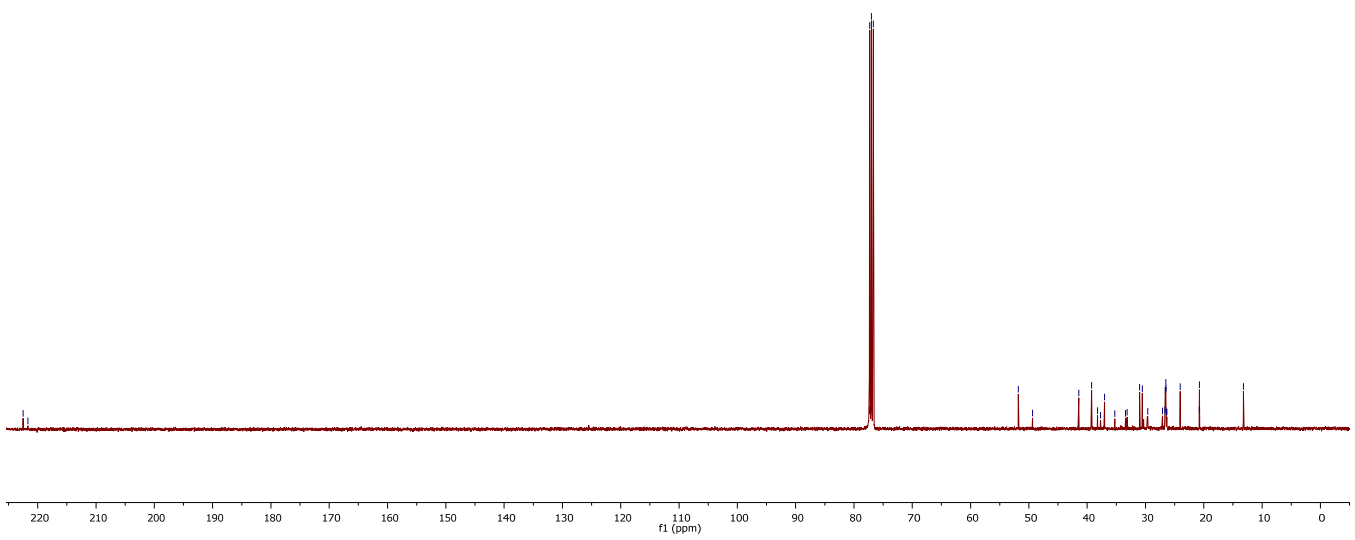



7.26  
5.11  
5.10  
5.10  
5.10  
5.09  
5.09  
5.08  
5.08  
5.07  
5.07  
5.06  
5.05  
5.05  
5.04  
5.04  
5.03  
5.02  
5.01  
5.01  
5.01  
5.00  
5.00  
2.00  
1.99  
1.99  
1.98  
1.98  
1.97  
1.96  
1.95  
1.95  
1.94  
1.94  
1.93  
1.92  
1.91  
1.91  
1.91  
1.90  
1.89  
1.88  
1.88  
1.87  
1.87  
1.86  
1.86  
1.85  
1.85  
1.84  
1.84  
1.83  
1.83  
1.83  
1.82  
1.82  
1.81  
1.81  
1.81  
1.80  
1.80  
1.79  
1.79  
1.78  
1.78  
1.77  
1.77  
1.76  
1.76  
1.75  
1.75  
1.74

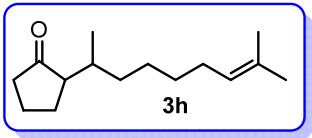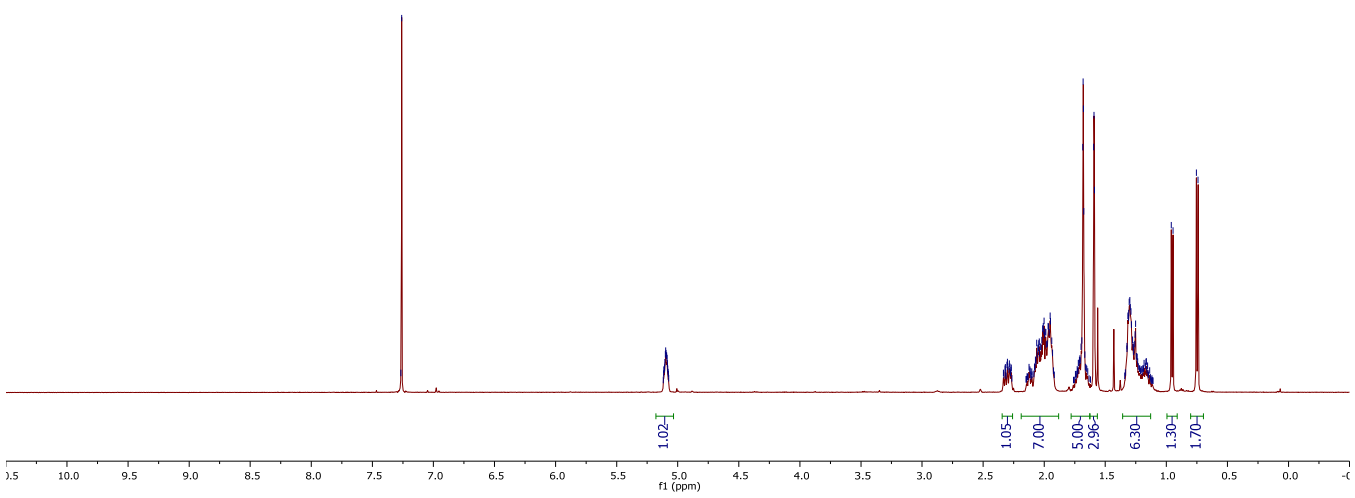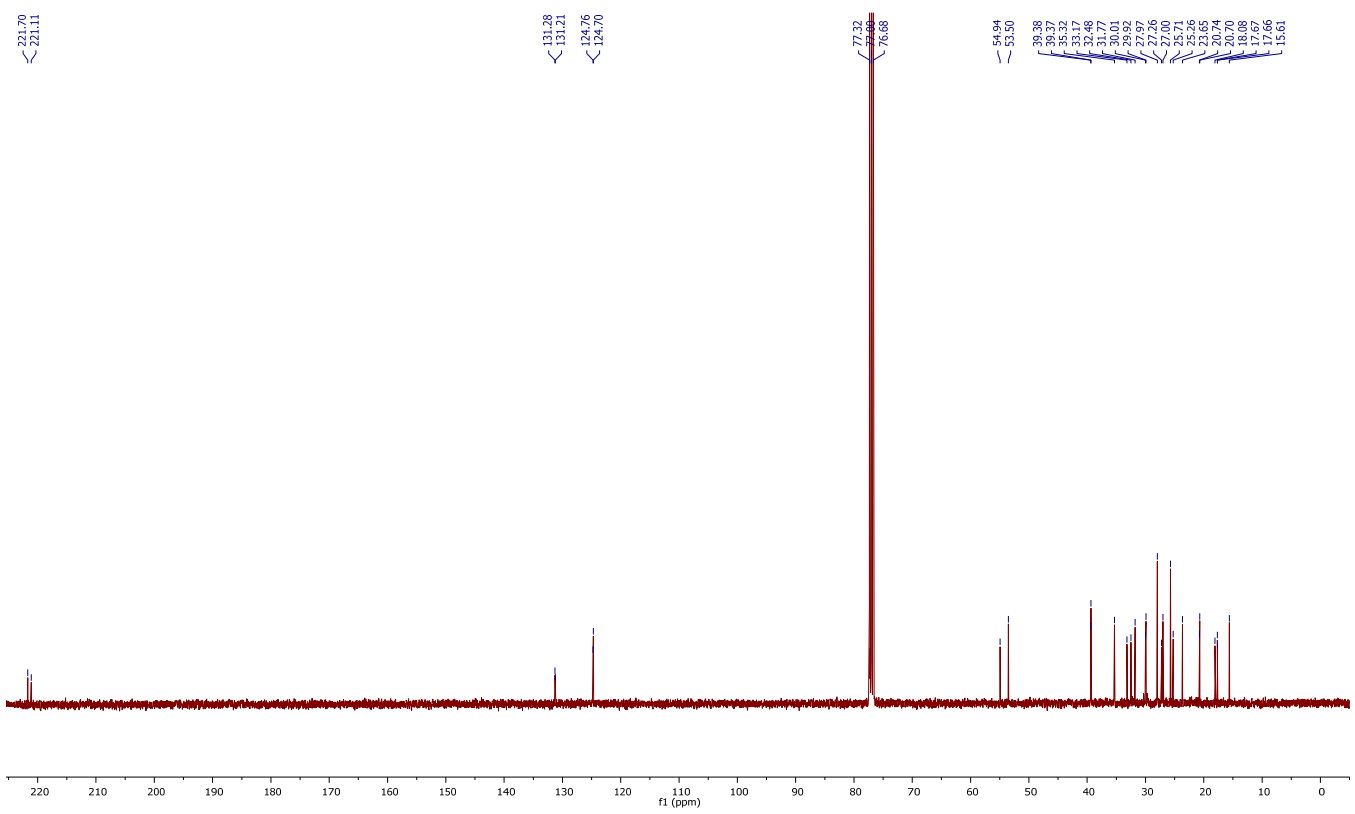

7.26  
3.37  
3.36  
3.36  
3.36  
3.35  
3.34  
3.34  
3.33  
3.33  
2.33  
2.32  
2.32  
2.31  
2.31  
2.30  
2.29  
2.29  
2.28  
2.27  
2.11  
2.11  
2.10  
2.08  
2.07  
2.07  
2.06  
2.06  
2.05  
2.04  
2.04  
2.04  
2.03  
2.02  
2.01  
2.01  
2.00  
2.00  
1.99  
1.99  
1.98  
1.98  
1.97  
1.96  
1.95  
1.95  
1.94  
1.94  
1.93  
1.92  
1.91  
1.91  
1.90  
1.89  
1.88  
1.88  
1.87  
1.87  
1.66  
1.66  
1.65  
1.64  
1.64  
1.59  
1.58  
1.58  
1.57  
1.56  
1.55  
1.55  
1.54  
1.54  
1.53  
1.53  
1.52  
1.52  
1.51  
1.51  
1.50  
1.50  
1.49  
1.49  
1.48  
1.48  
1.47  
1.47  
1.46  
1.46  
1.45  
1.45  
1.44  
1.44  
1.43  
1.43  
1.42  
1.42  
1.41  
1.41  
1.40  
1.40  
1.39  
1.39  
1.38  
1.38  
1.37  
1.37  
1.36  
1.36  
1.35  
1.35  
1.34  
1.34  
1.33  
1.33  
1.32  
1.32  
1.31  
1.31  
1.30  
1.30  
1.29  
1.29  
1.28  
1.28  
1.27  
1.27  
1.26  
1.26  
1.25  
1.25  
1.24  
1.24  
1.23  
1.23  
1.22  
1.22  
1.21  
1.21  
1.20  
1.20  
1.19  
1.19  
1.18  
1.18  
1.17  
1.17  
1.16  
1.16  
1.15  
1.15  
1.14  
1.14  
1.13  
1.13  
1.12  
1.12  
1.11  
1.11  
1.10  
1.10  
1.09  
1.09  
1.08  
1.08  
1.07  
1.07  
1.06  
1.06  
1.05  
1.05  
1.04  
1.04  
1.03  
1.03  
1.02  
1.02  
1.01  
1.01  
1.00  
1.00  
0.99  
0.99  
0.98  
0.98  
0.97  
0.97  
0.74  
0.74

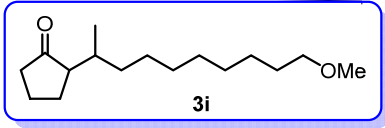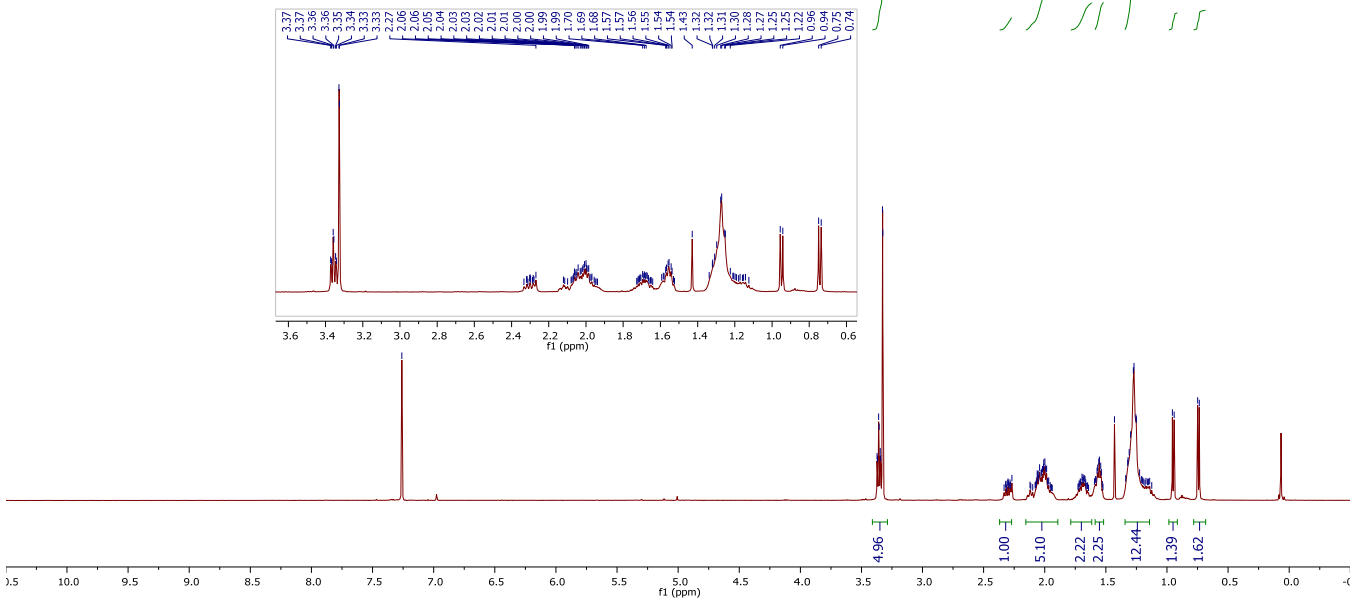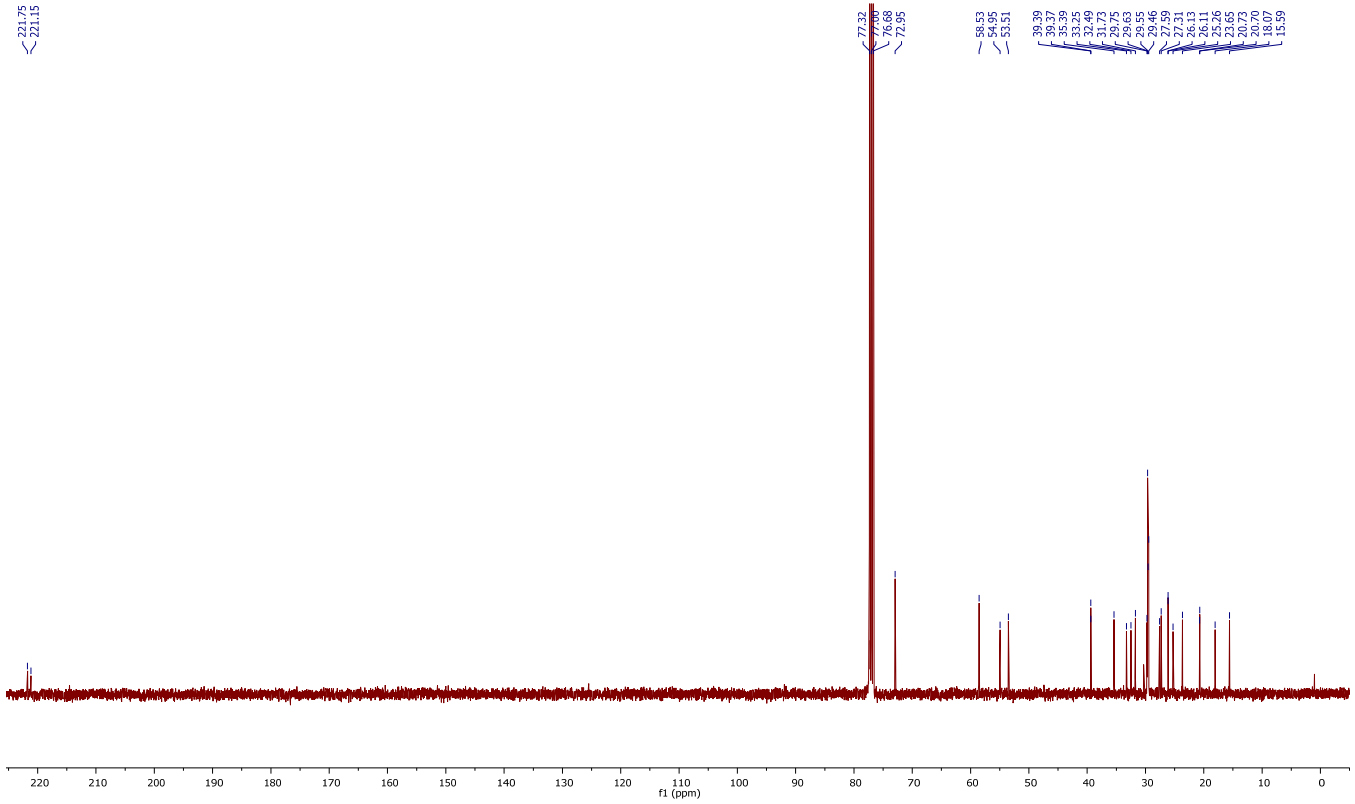



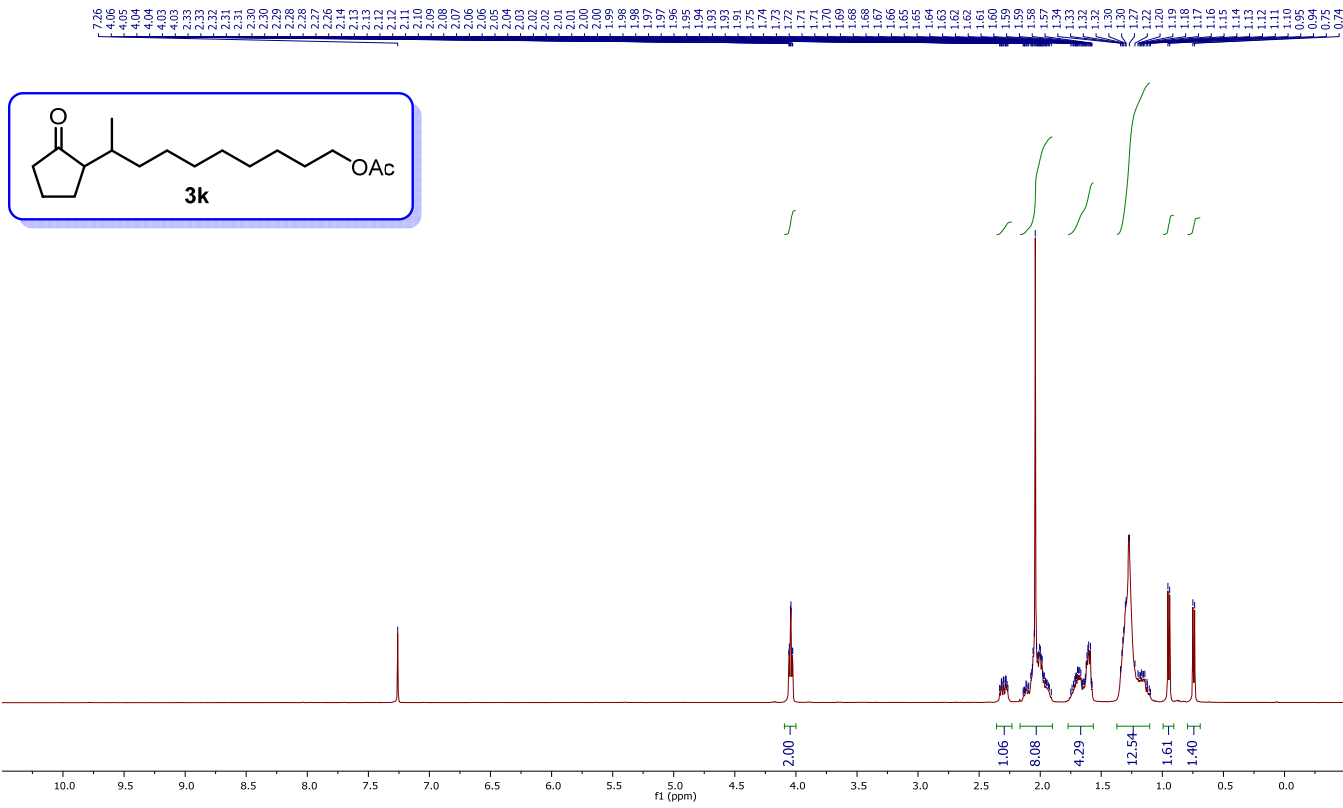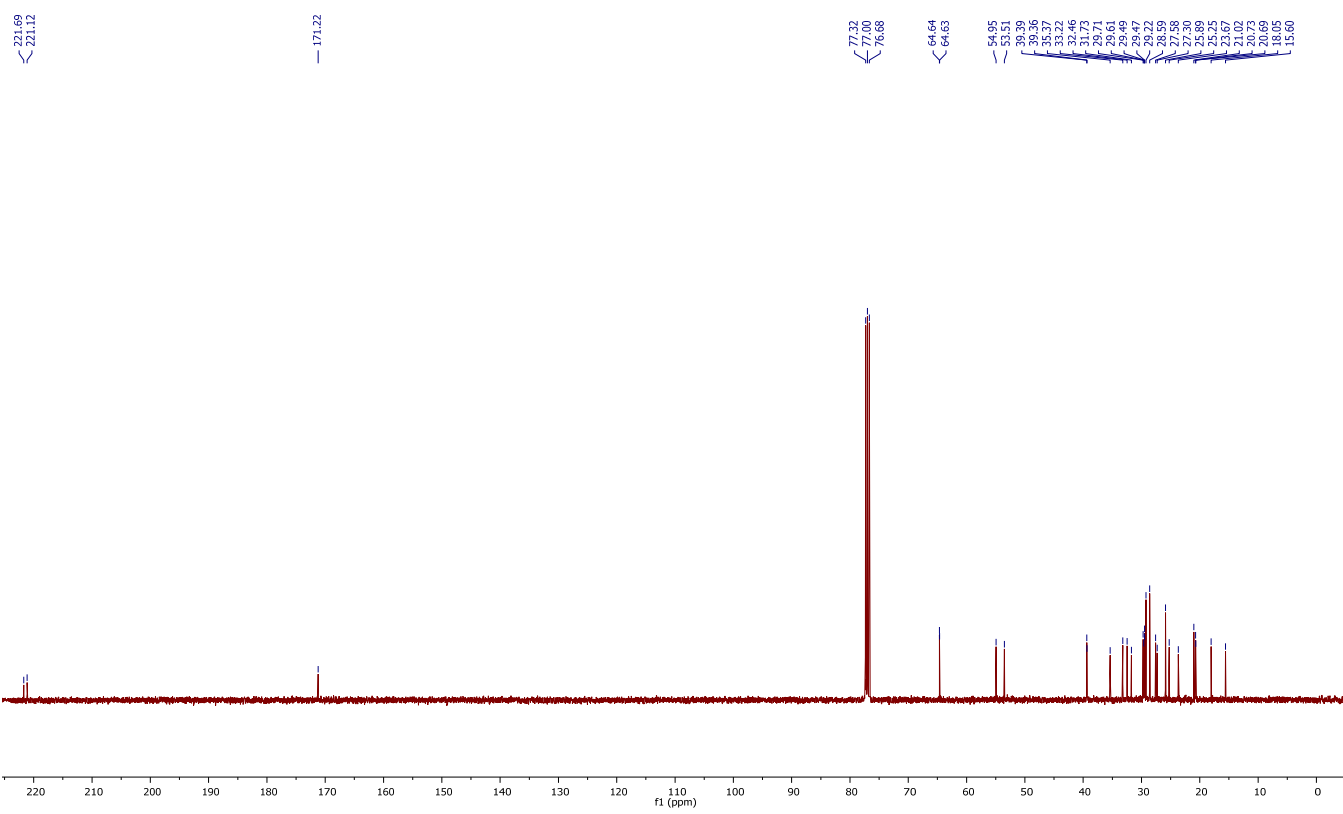

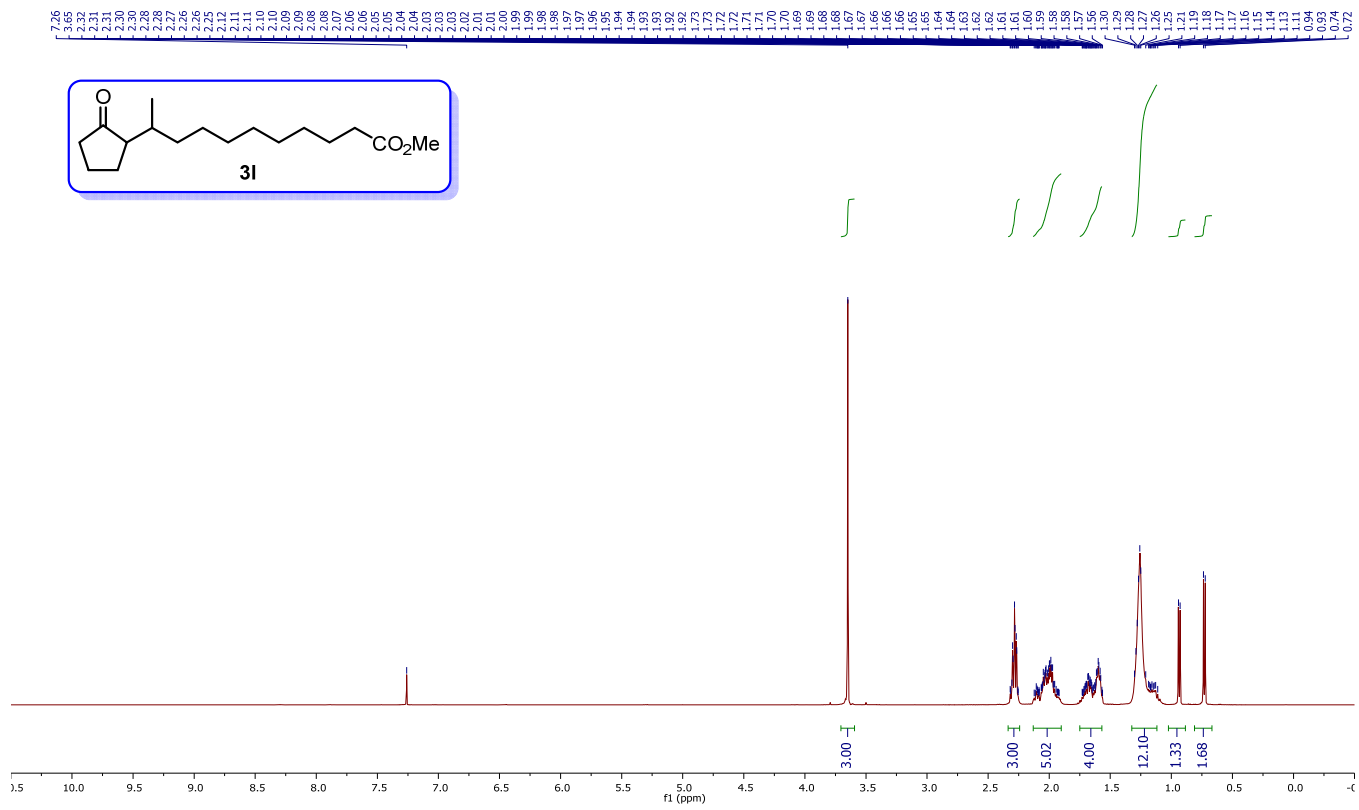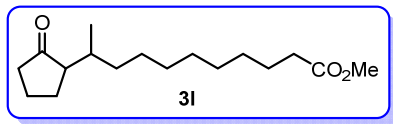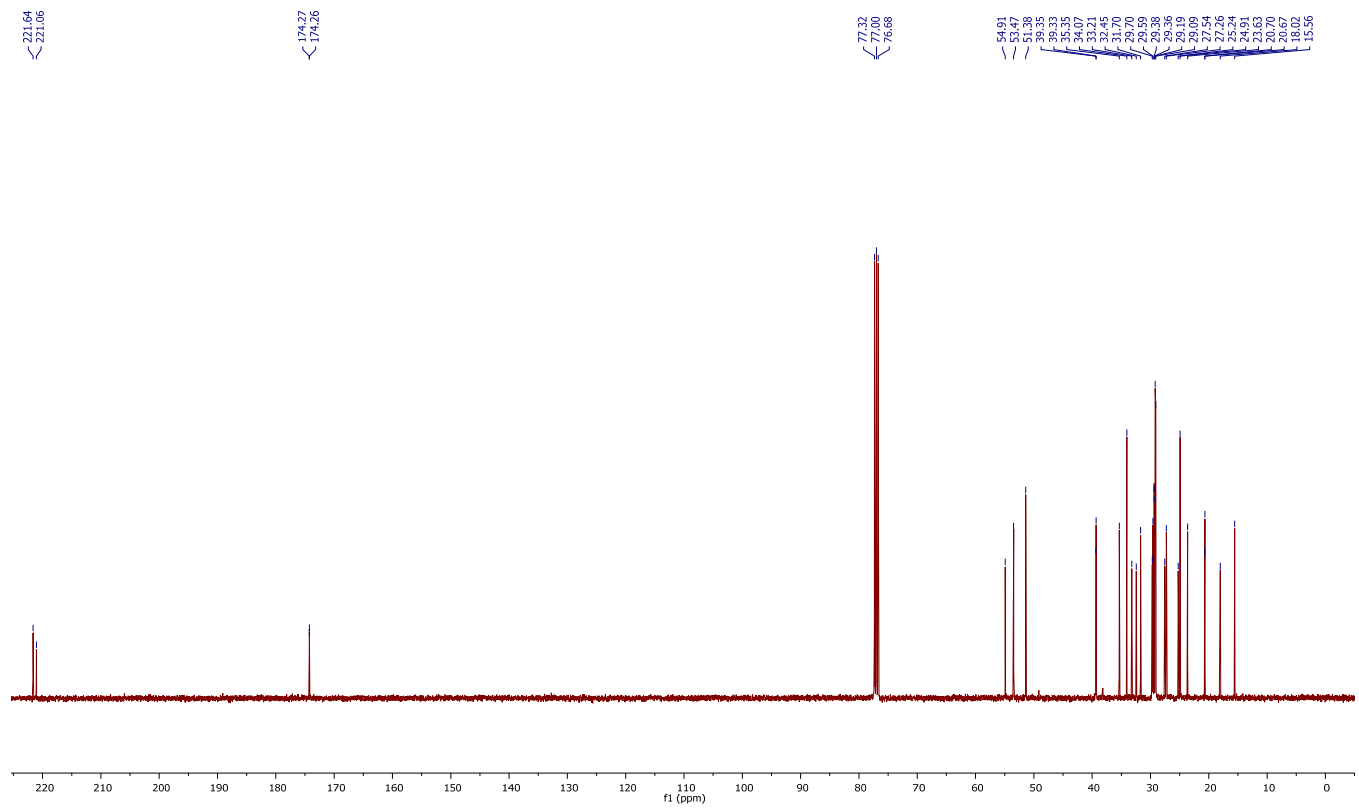





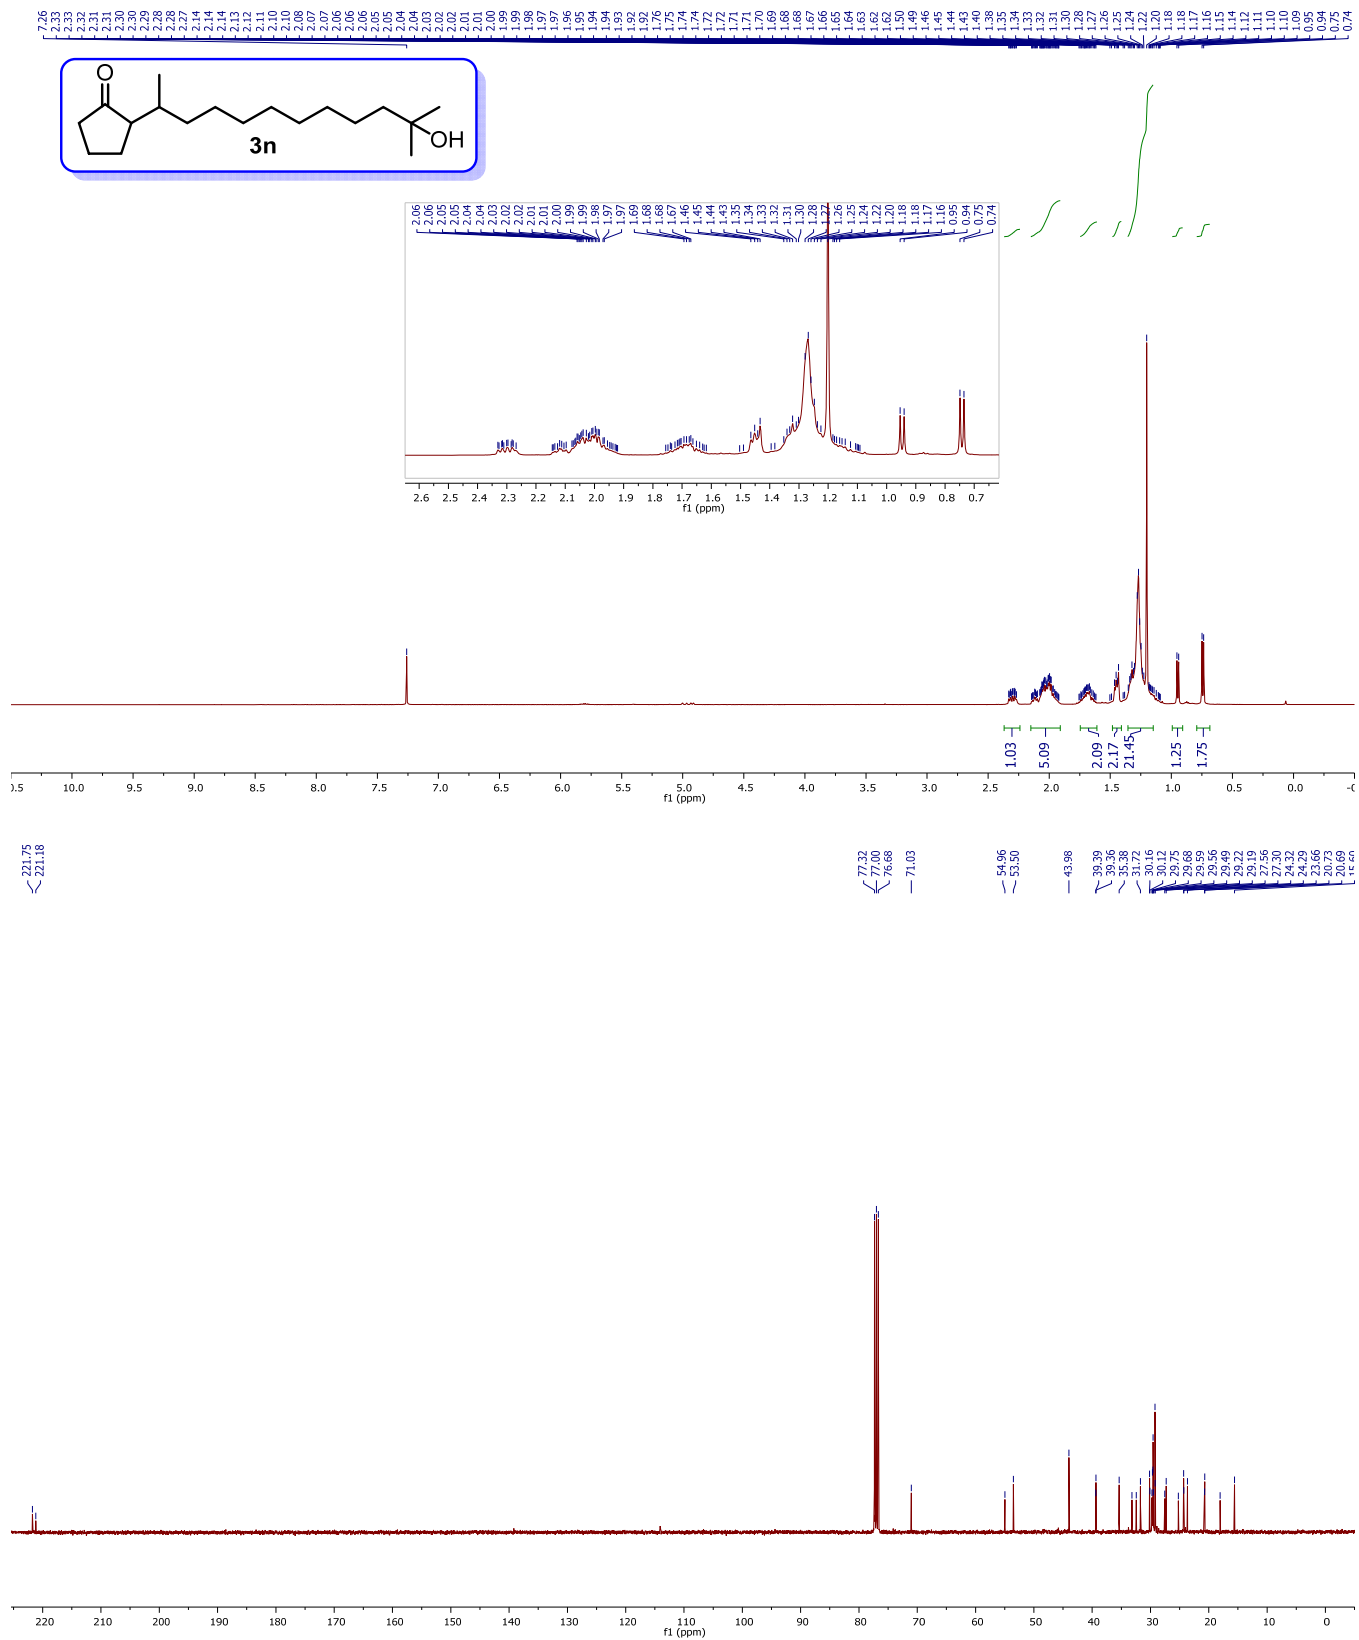

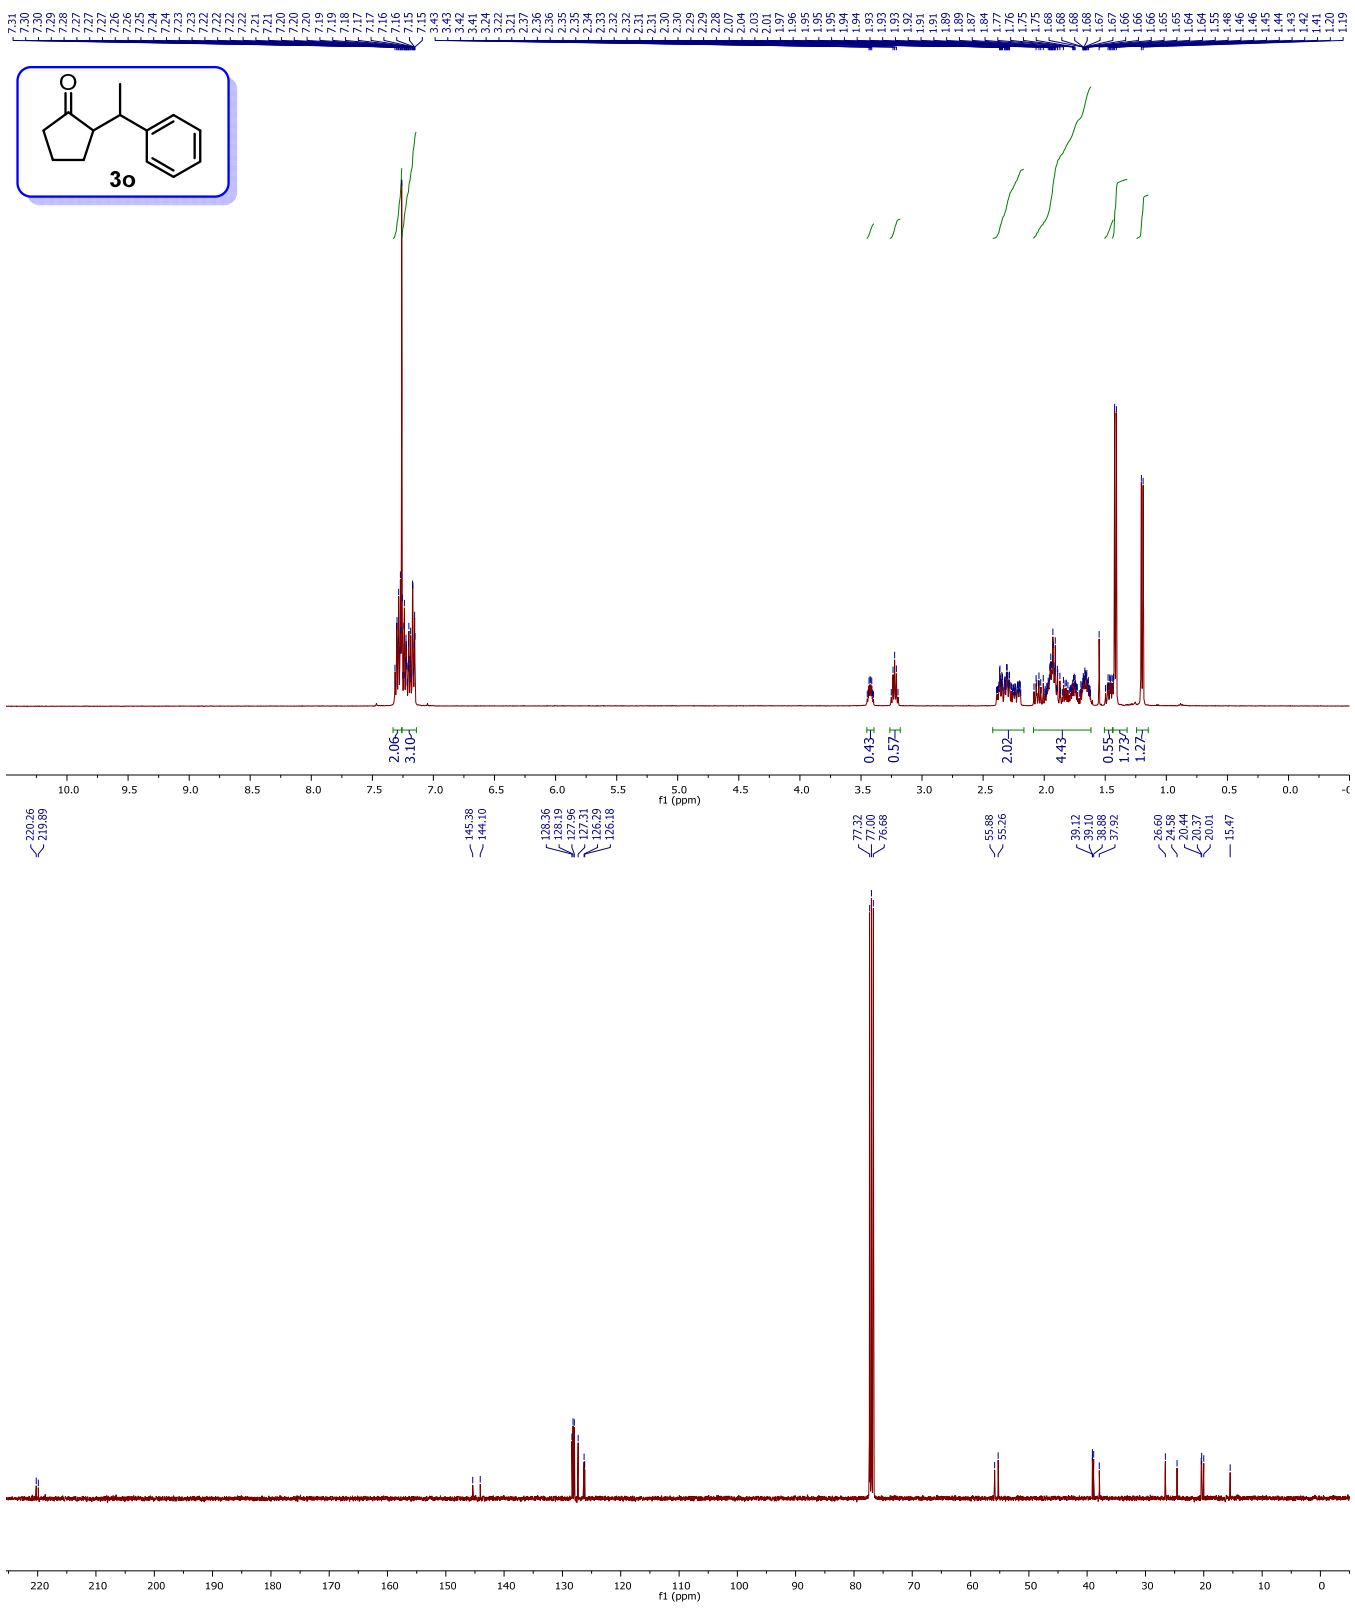

2.49  
2.49  
2.23  
2.23  
2.22  
2.22  
2.22  
2.21  
2.21  
2.21  
2.20  
2.19  
2.18  
2.18  
2.15  
2.14  
2.13  
2.13  
2.11  
2.11  
2.10  
2.09  
2.07  
1.99  
1.99  
1.98  
1.98  
1.97  
1.96  
1.96  
1.95  
1.93  
1.93  
1.91  
1.91  
1.87  
1.87  
1.75  
1.75  
1.73  
1.73  
1.72  
1.71  
1.63  
1.63  
1.61  
1.59  
1.58  
1.58  
1.57  
1.57  
1.52  
1.52  
1.52  
1.52  
1.48  
1.48  
1.47  
1.47  
1.46  
1.45  
1.45  
1.42  
1.39  
1.39  
1.30  
1.29  
1.28  
1.28  
1.27  
1.27  
1.26  
1.26  
1.19  
1.19  
1.17  
1.17  
1.16  
1.16  
1.15  
1.15  
1.15  
1.15  
1.14  
1.14  
1.13  
1.13  
1.12  
1.12  
1.11  
1.11  
1.10  
1.10  
1.09  
1.09  
1.09  
1.09  
1.07  
1.07

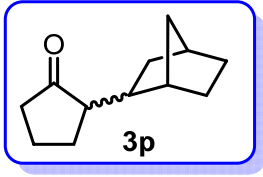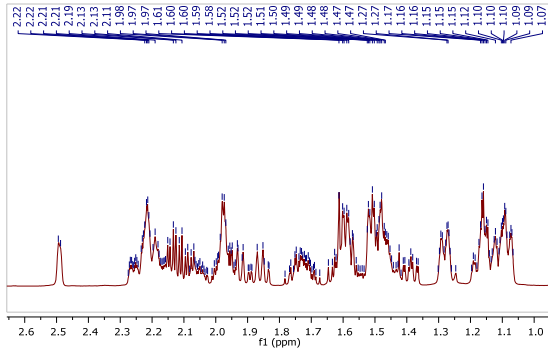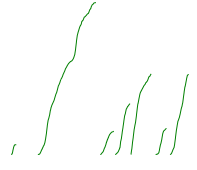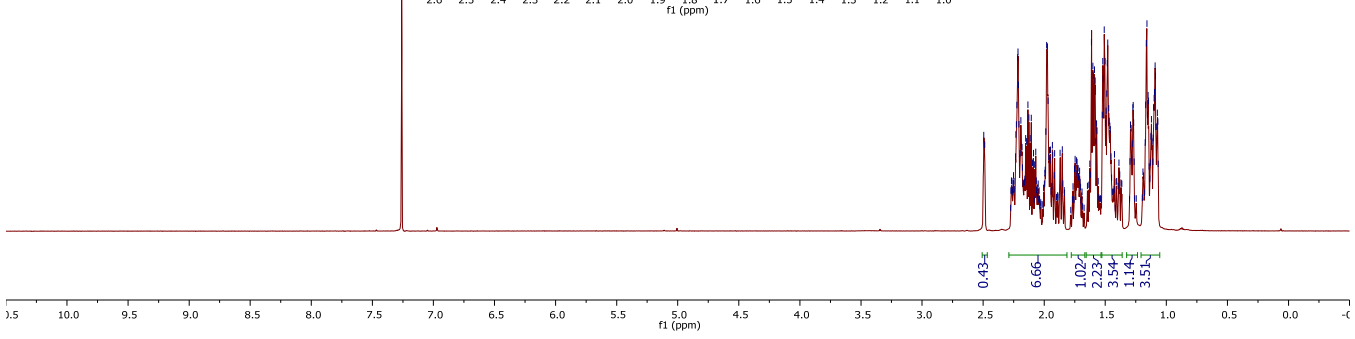

221.09  
220.73  
77.25  
77.00  
76.75  
54.17  
49.79  
49.79  
42.31  
39.72  
39.23  
39.23  
38.97  
38.97  
37.03  
36.86  
36.72  
36.72  
35.67  
35.67  
35.50  
30.41  
30.27  
28.64  
28.62  
27.46  
20.41

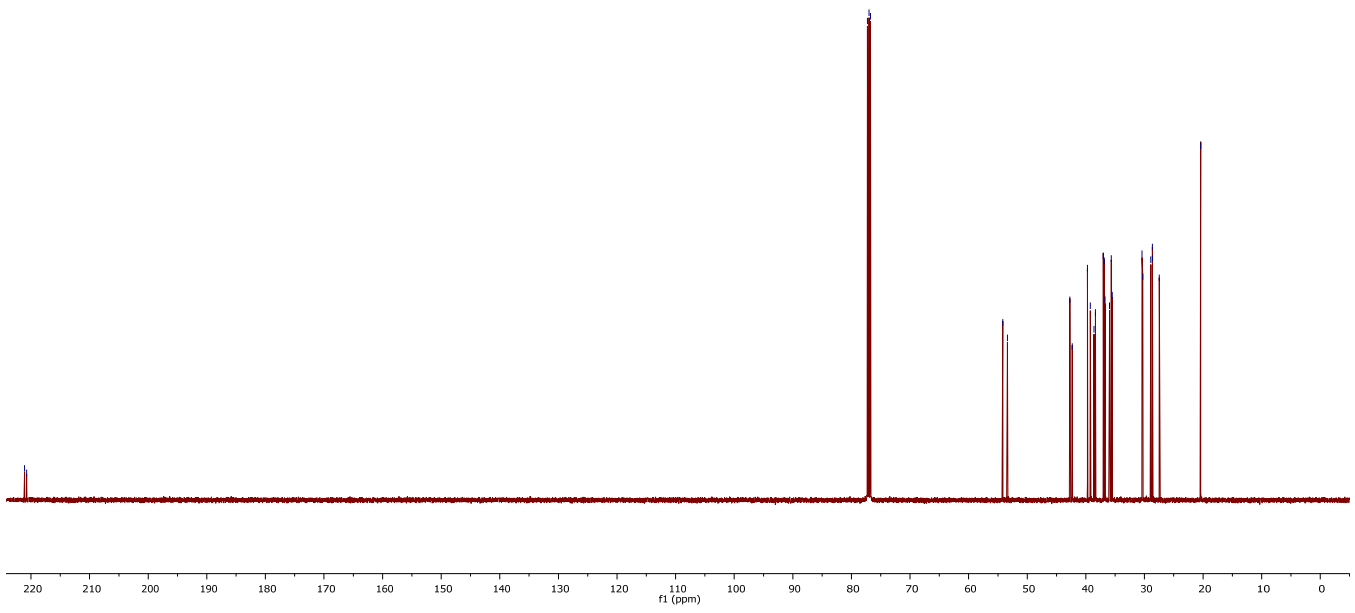

7.27  
7.26  
7.246  
7.246  
2.45  
2.45  
2.44  
2.44  
2.43  
2.43  
2.43  
2.42  
2.41  
2.41  
2.38  
2.34  
2.34  
2.33  
2.33  
2.32  
2.31  
2.31  
2.30  
2.30  
2.16  
2.16  
2.15  
2.15  
2.12  
2.12  
2.11  
2.14  
2.10  
2.13  
2.12  
1.98  
2.12  
1.94  
1.94  
1.94  
1.71  
2.10  
2.10  
2.08  
2.08  
2.07  
2.07  
2.05  
2.05  
2.04  
1.98  
1.98  
1.94  
1.94  
1.92  
1.27  
1.26  
1.25  
1.25  
1.83  
1.82  
1.81  
1.81  
1.19  
1.80  
1.19  
1.80  
1.79  
1.16  
1.78  
1.74  
1.04  
1.72  
1.71  
0.94  
1.71  
1.69  
1.69  
1.60  
1.60  
1.58  
1.57  
1.56  
1.55  
1.43  
1.31  
1.31  
1.28  
1.28  
1.27  
1.26  
1.25  
1.25  
1.22  
1.21  
1.21  
1.19  
1.16  
1.15  
1.13  
1.13  
1.12  
1.12  
1.12  
1.12  
1.03  
1.03  
1.02  
1.00  
0.94  
0.86  
0.86  
0.86  
0.73

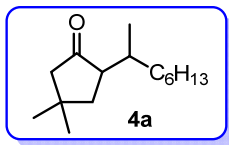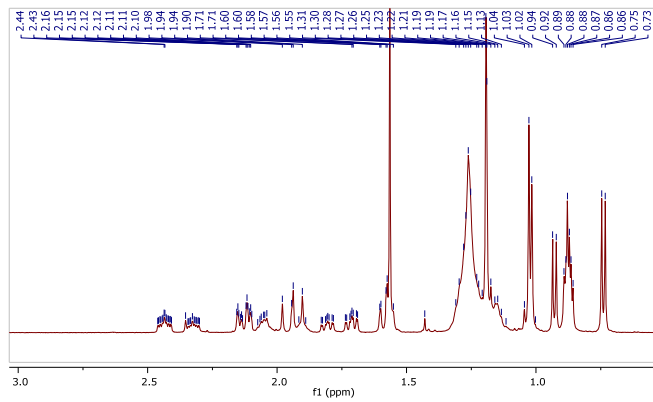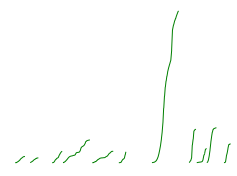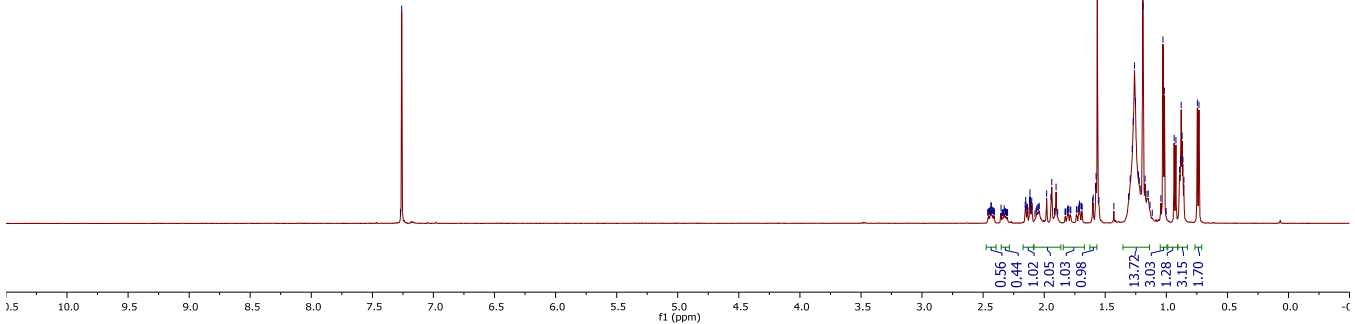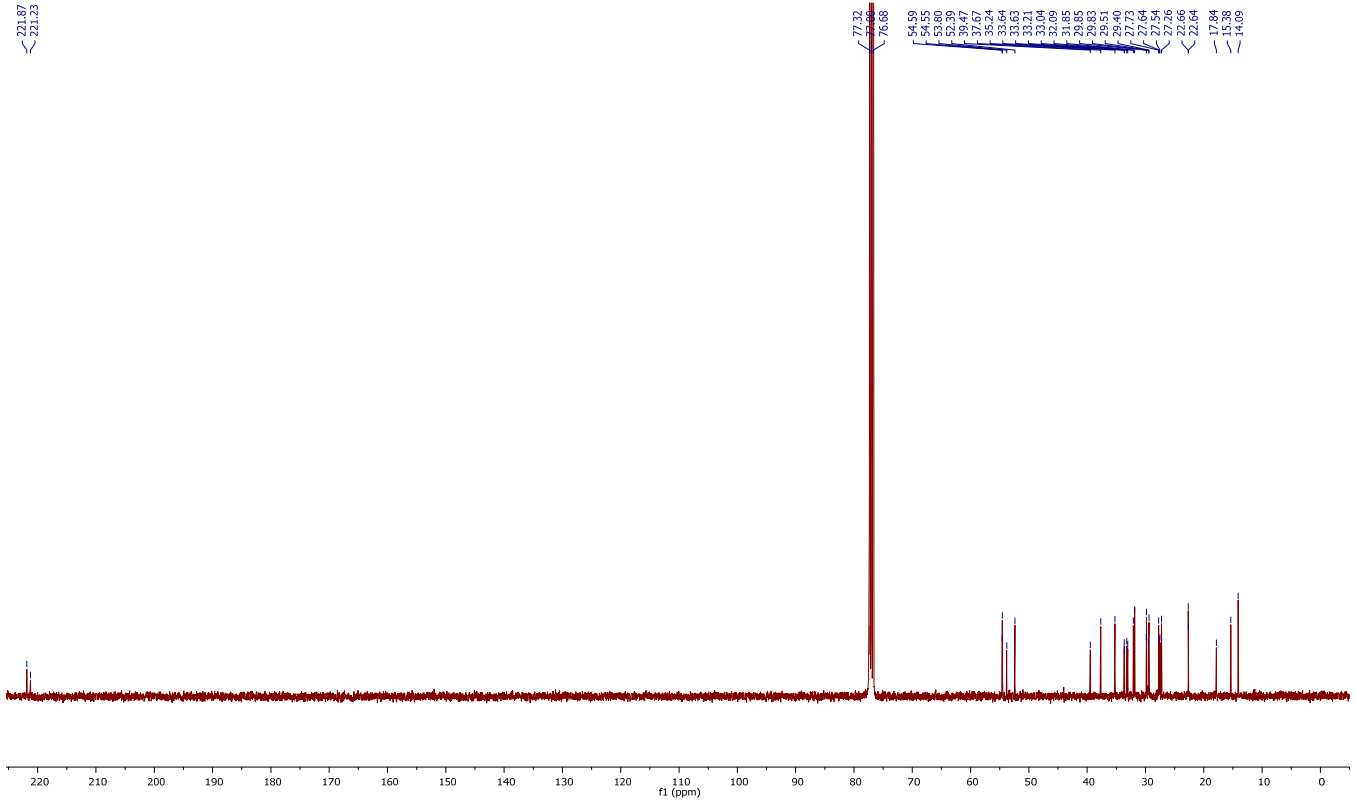

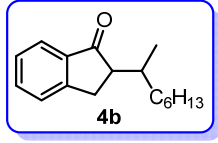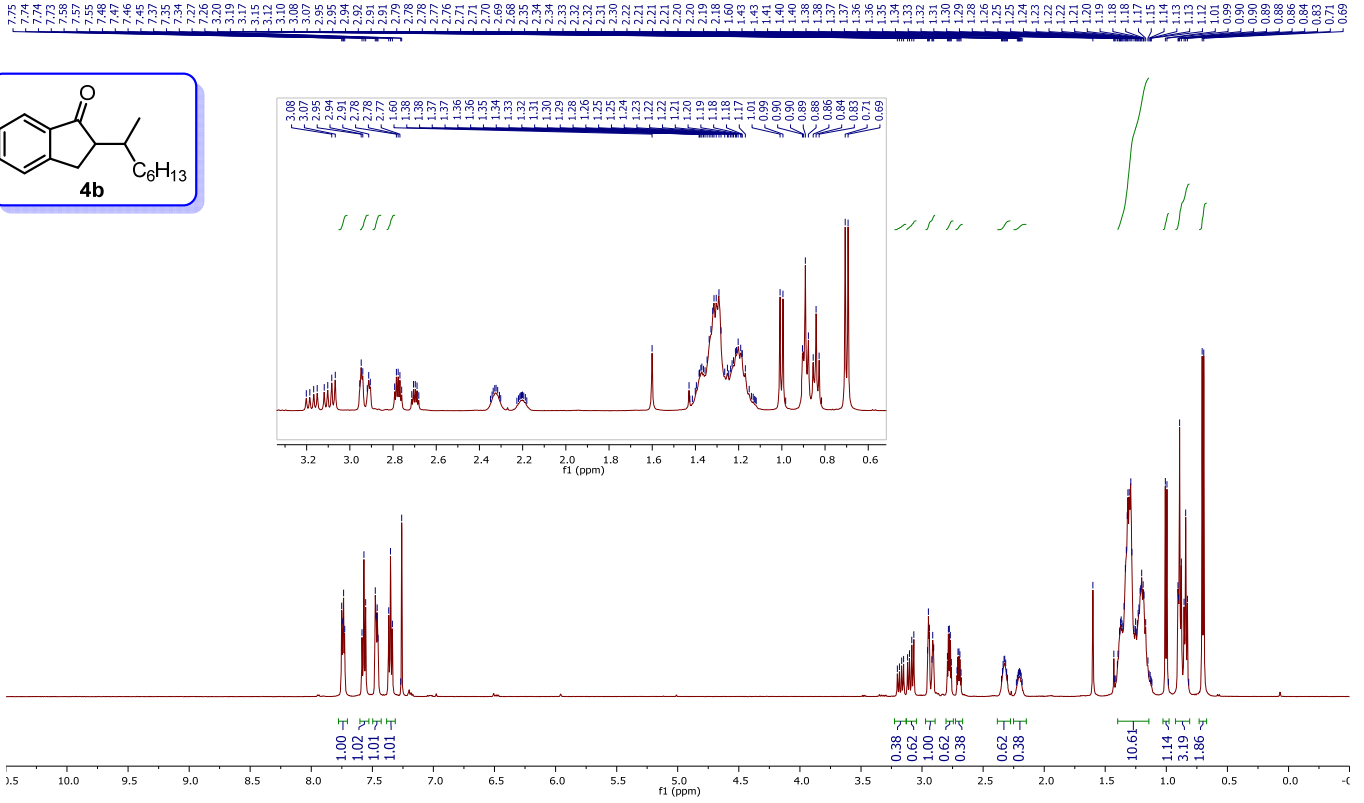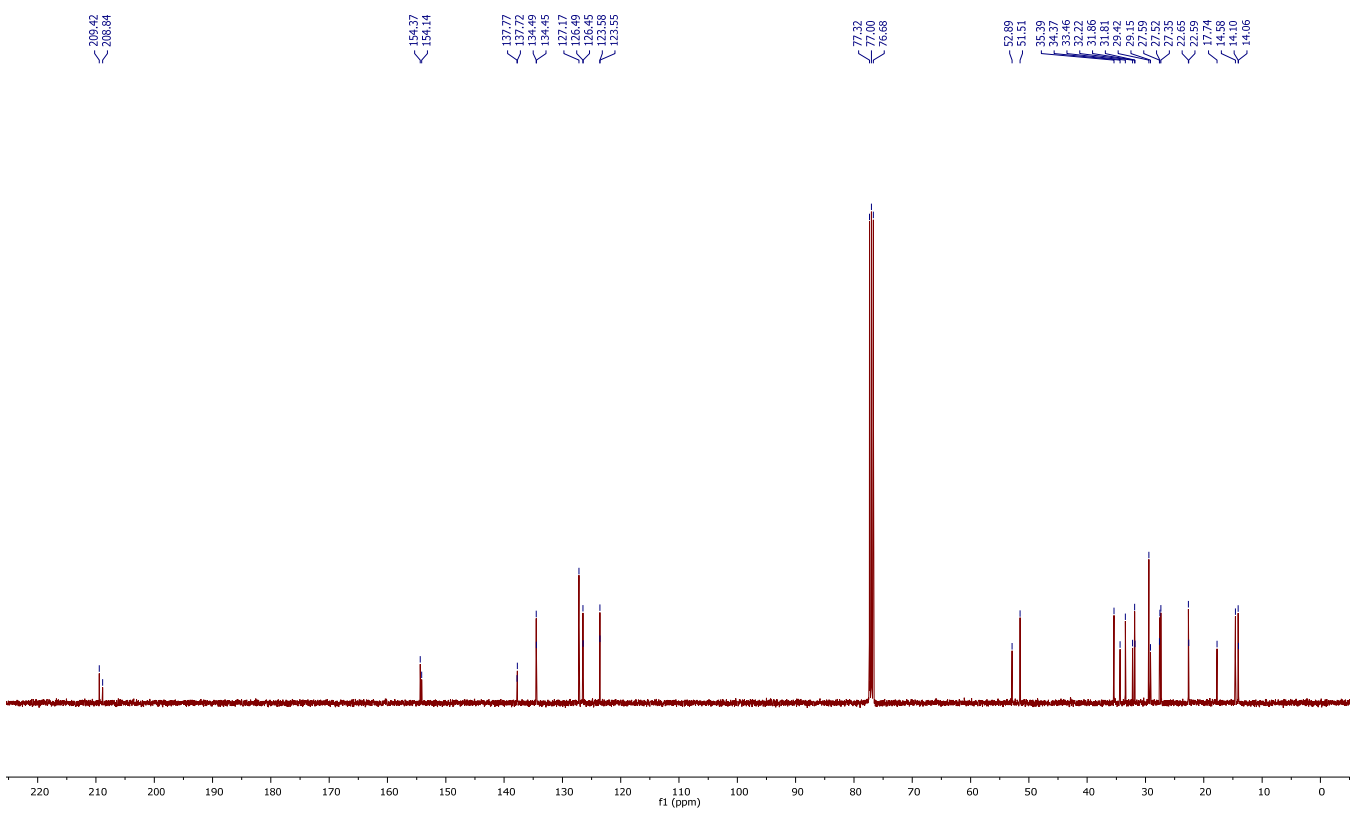

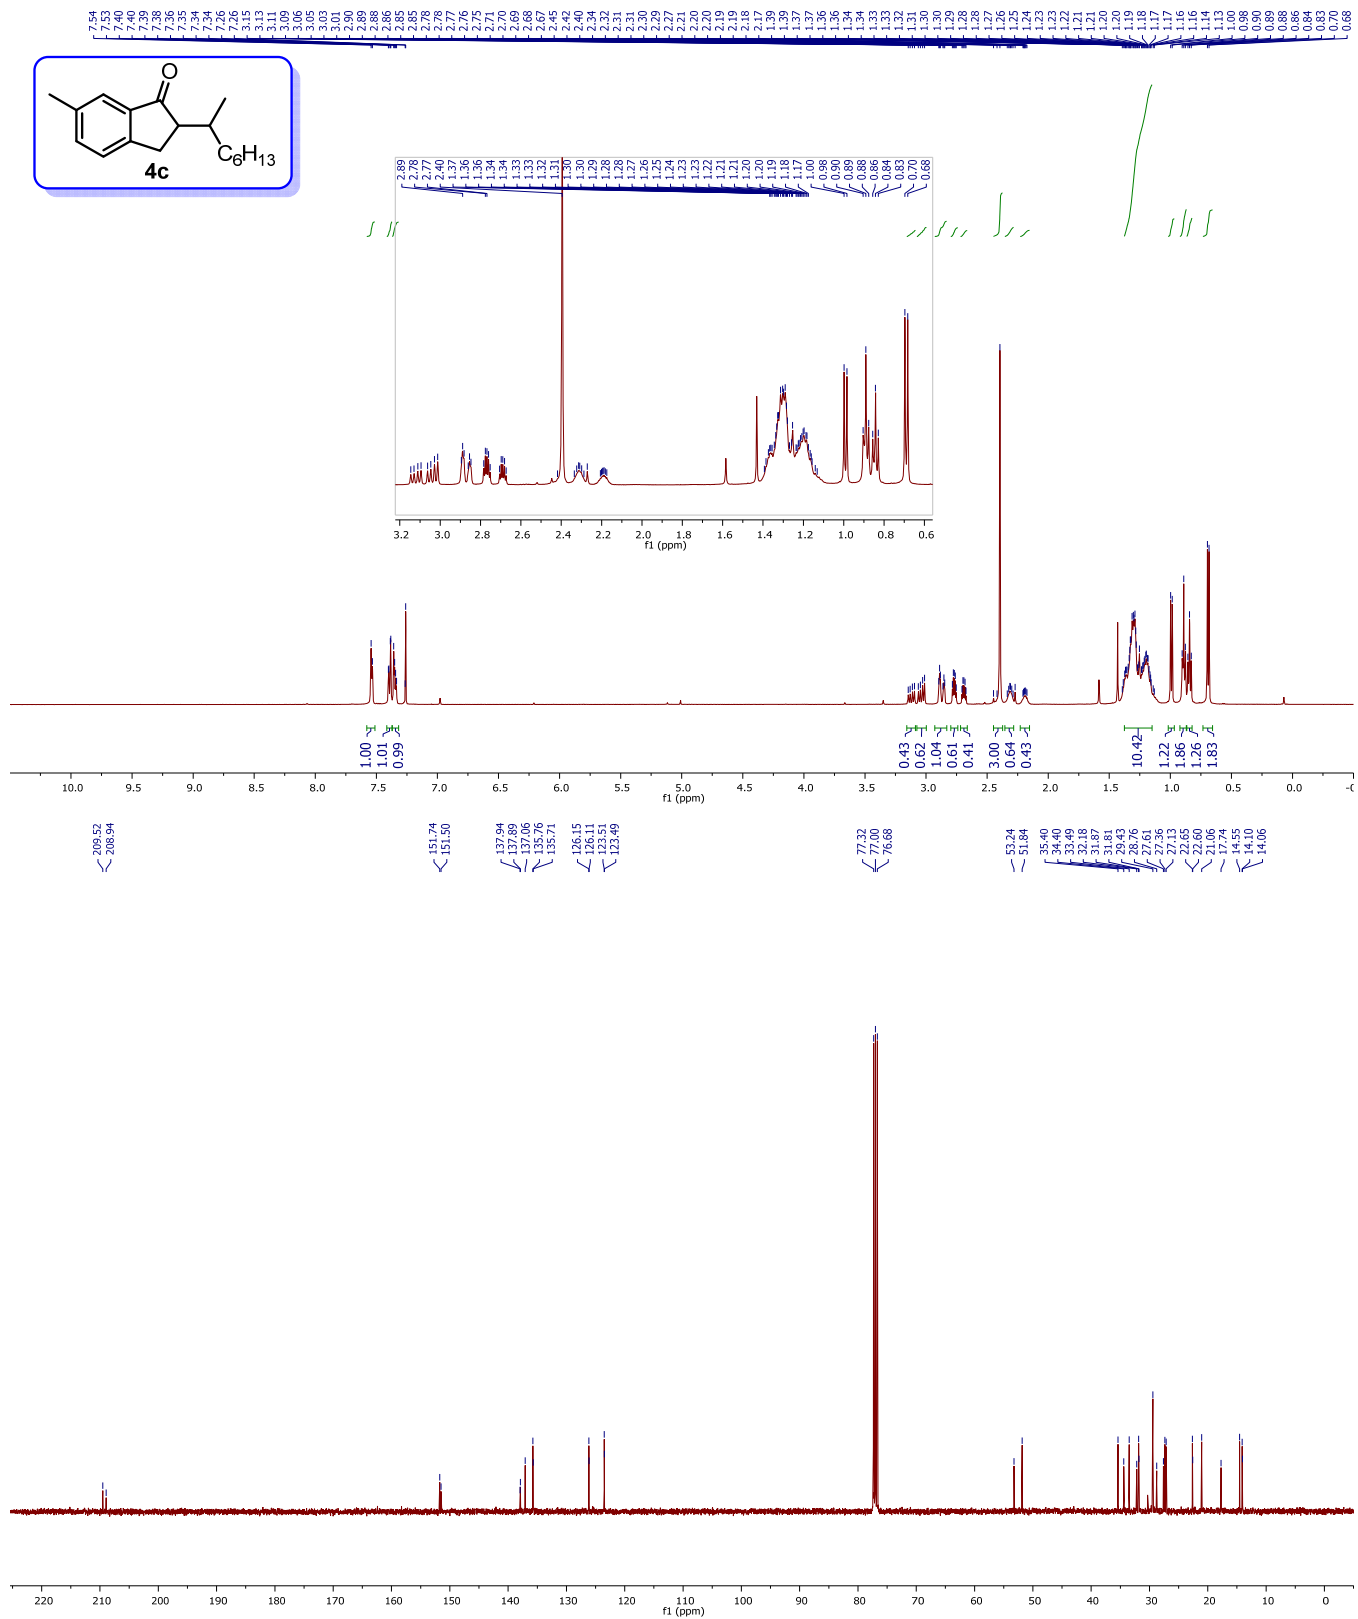



7.44  
7.43  
7.42  
7.41  
7.38  
7.37  
7.36  
7.35  
7.30  
7.29  
7.28  
7.27  
7.26  
7.25  
7.24  
7.23  
7.22  
7.21  
7.20  
7.19  
7.18  
7.17  
7.16  
7.15  
7.14  
7.13  
7.12  
7.11  
7.10  
7.09  
7.08  
7.07  
7.05  
7.04  
7.03  
7.02  
7.01  
7.00  
2.90  
2.89  
2.88  
2.87  
2.86  
2.85  
2.84  
2.83  
2.82  
2.81  
2.80  
2.79  
2.78  
2.77  
2.76  
2.75  
2.74  
2.73  
2.72  
2.71  
2.70  
2.69  
2.68  
2.67  
2.66  
2.65  
2.64  
2.63  
2.62  
2.61  
2.60  
2.59  
2.58  
2.57  
2.56  
2.55  
2.54  
2.53  
2.52  
2.51  
2.50  
2.49  
2.48  
2.47  
2.46  
2.45  
2.44  
2.43  
2.42  
2.41  
2.40  
2.39  
2.38  
2.37  
2.36  
2.35  
2.34  
2.33  
2.32  
2.31  
2.30  
2.29  
2.28  
2.27  
2.26  
2.25  
2.24  
2.23  
2.22  
2.21  
2.20  
2.19  
2.18  
2.17  
2.16  
2.15  
2.14  
2.13  
2.12  
2.11  
2.10  
2.09  
2.08  
2.07  
2.06  
2.05  
2.04  
2.03  
2.02  
2.01  
2.00  
1.99  
1.98  
1.97  
1.96  
1.95  
1.94  
1.93  
1.92  
1.91  
1.90  
1.89  
1.88  
1.87  
1.86  
1.85  
1.84  
1.83  
1.82  
1.81  
1.80  
1.79  
1.78  
1.77  
1.76  
1.75  
1.74  
1.73  
1.72  
1.71  
1.70  
1.69  
1.68  
1.67  
1.66  
1.65  
1.64  
1.63  
1.62  
1.61  
1.60  
1.59  
1.58  
1.57  
1.56  
1.55  
1.54  
1.53  
1.52  
1.51  
1.50  
1.49  
1.48  
1.47  
1.46  
1.45  
1.44  
1.43  
1.42  
1.41  
1.40  
1.39  
1.38  
1.37  
1.36  
1.35  
1.34  
1.33  
1.32  
1.31  
1.30  
1.29  
1.28  
1.27  
1.26  
1.25  
1.24  
1.23  
1.22  
1.21  
1.20  
1.19  
1.18  
1.17  
1.16  
1.15  
1.14  
1.13  
1.12  
1.11  
1.10  
1.09  
1.08  
1.07  
1.06  
1.05  
1.04  
1.03  
1.02  
1.01  
1.00  
0.99  
0.98  
0.97  
0.96  
0.95  
0.94  
0.93  
0.92  
0.91  
0.90  
0.89  
0.88  
0.87  
0.86  
0.85  
0.84  
0.83  
0.82  
0.81  
0.80  
0.79  
0.78  
0.77  
0.76  
0.75  
0.74  
0.73  
0.72  
0.71  
0.70  
0.69  
0.68  
0.67  
0.66  
0.65  
0.64  
0.63  
0.62  
0.61  
0.60  
0.59  
0.58  
0.57  
0.56  
0.55  
0.54  
0.53  
0.52  
0.51  
0.50  
0.49  
0.48  
0.47  
0.46  
0.45  
0.44  
0.43  
0.42  
0.41  
0.40  
0.39  
0.38  
0.37  
0.36  
0.35  
0.34  
0.33  
0.32  
0.31  
0.30  
0.29  
0.28  
0.27  
0.26  
0.25  
0.24  
0.23  
0.22  
0.21  
0.20  
0.19  
0.18  
0.17  
0.16  
0.15  
0.14  
0.13  
0.12  
0.11  
0.10  
0.09  
0.08  
0.07  
0.06  
0.05  
0.04  
0.03  
0.02  
0.01  
0.00

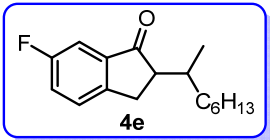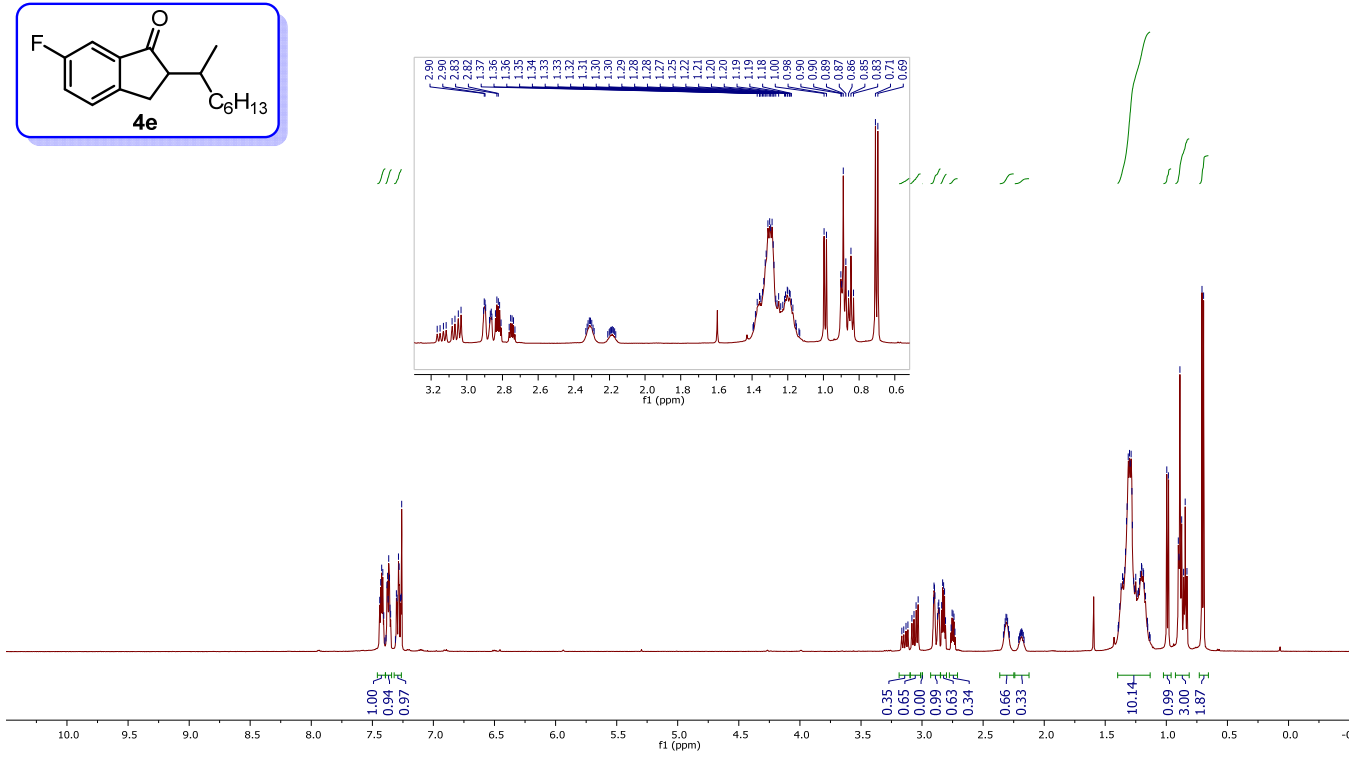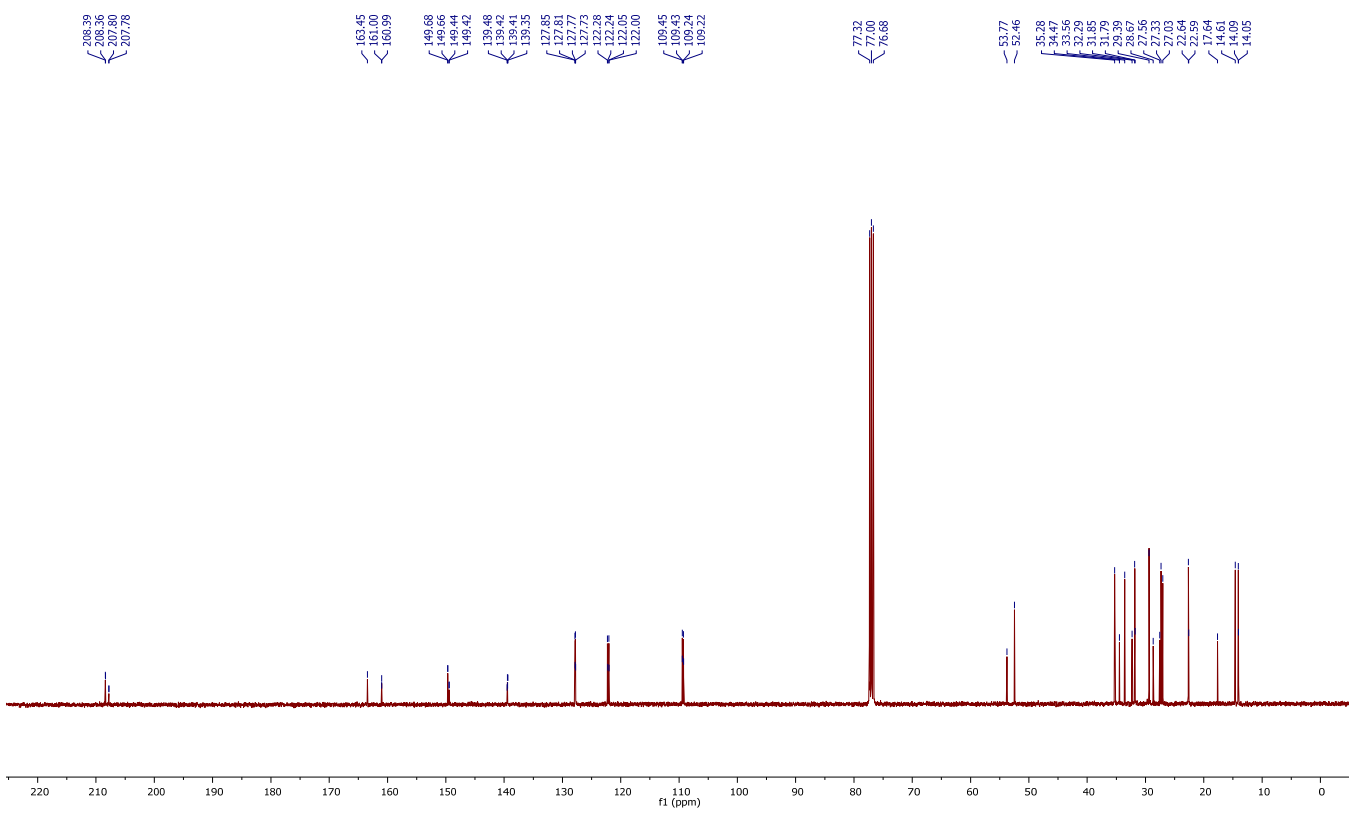



7.65  
7.64  
7.64  
7.64  
7.63  
7.63  
7.59  
7.58  
7.56  
7.56  
7.54  
7.54  
7.31  
7.26  
3.20  
3.19  
3.17  
3.15  
3.12  
3.10  
3.08  
3.08  
2.91  
2.90  
2.90  
2.88  
2.86  
2.83  
2.82  
2.81  
2.80  
2.80  
2.74  
2.74  
2.72  
2.72  
2.72  
2.36  
2.35  
2.34  
2.34  
2.33  
2.32  
2.32  
2.31  
2.31  
2.22  
2.22  
2.22  
2.21  
2.20  
2.20  
1.42  
1.40  
1.39  
1.38  
1.38  
1.37  
1.36  
1.36  
1.36  
1.35  
1.35  
1.33  
1.33  
1.32  
1.32  
1.31  
1.30  
1.29  
1.29  
1.27  
1.25  
1.24  
1.24  
1.23  
1.23  
1.22  
1.22  
1.21  
1.21  
1.21  
1.20  
1.20  
1.19  
1.19  
1.18  
1.18  
1.17  
1.16  
1.16  
1.01  
1.01  
0.99  
0.89  
0.88  
0.86  
0.85  
0.83  
0.72  
0.70

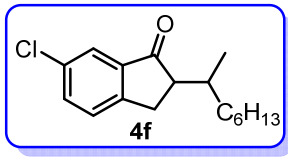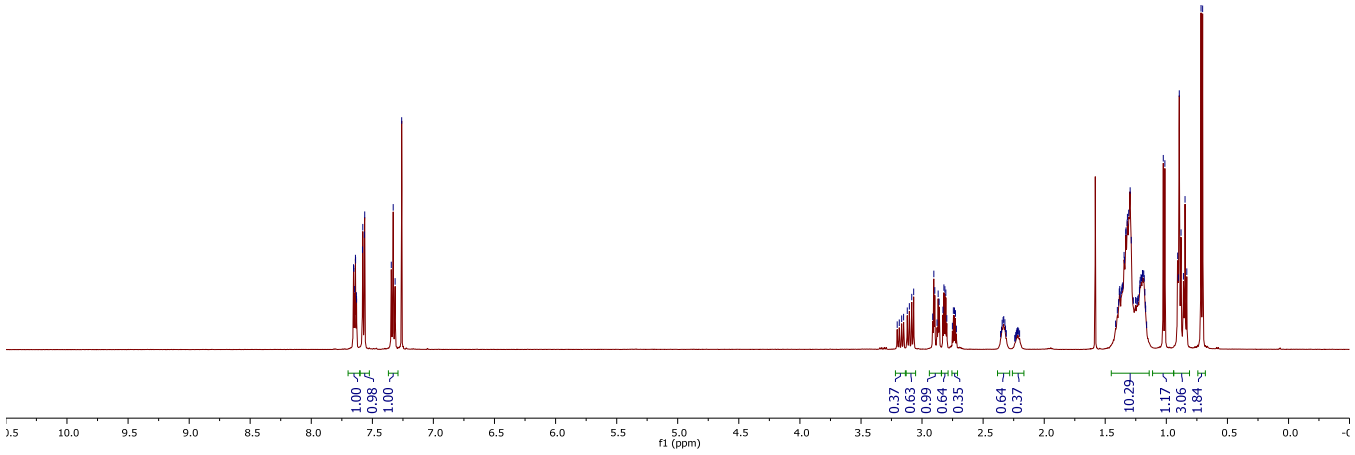

208.39  
207.80

151.88  
151.66

139.65  
139.60  
134.15  
134.12  
132.97  
132.80  
121.85  
121.85

77.32  
77.32  
76.68

52.88  
51.53  
35.28  
34.42  
33.54  
32.66  
31.79  
29.39  
28.28  
27.36  
26.69  
22.65  
22.59  
17.66  
14.09  
14.05

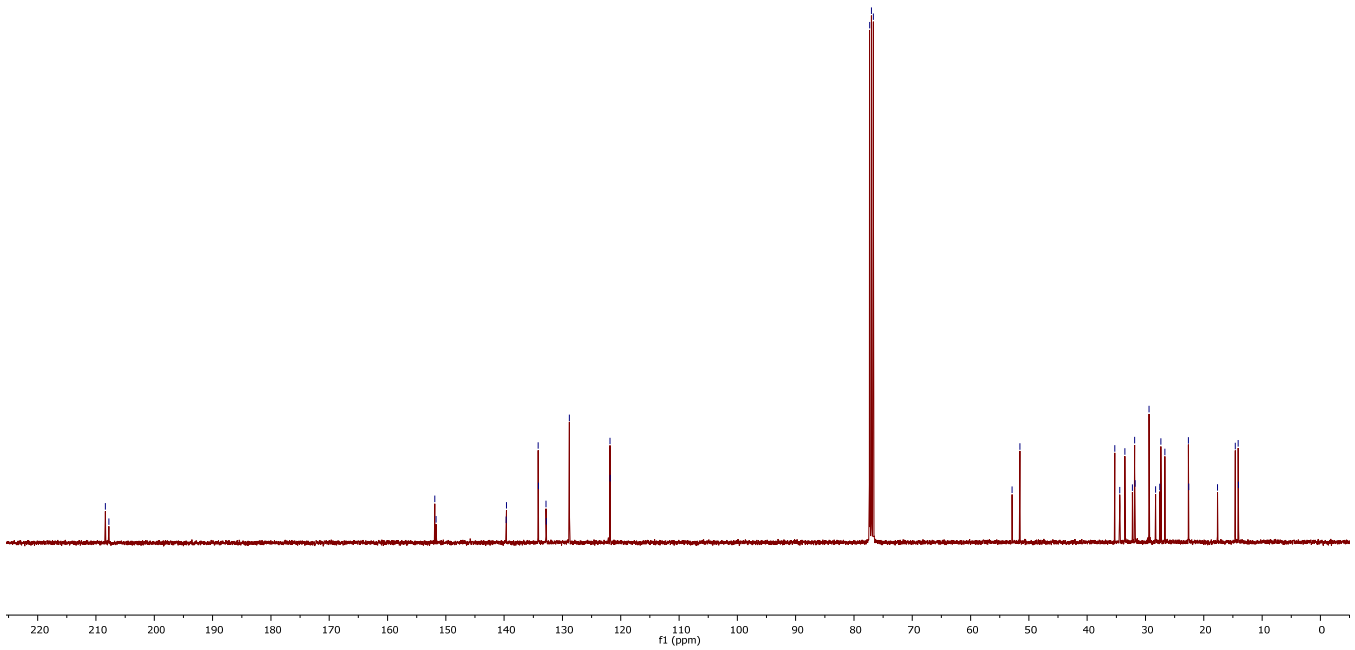

7.64  
7.63  
7.62  
7.26  
7.26  
7.26  
7.17  
7.15  
3.14  
3.12  
3.10  
3.06  
3.06  
3.04  
3.02  
3.00  
2.99  
2.88  
2.86  
2.85  
2.85  
2.77  
2.76  
2.74  
2.74  
2.70  
2.69  
2.68  
2.67  
2.66  
2.45  
2.45  
2.43  
2.32  
2.31  
2.30  
2.30  
2.20  
2.20  
2.19  
2.19  
2.19  
2.18  
2.17  
2.17  
1.39  
1.39  
1.38  
1.37  
1.37  
1.36  
1.36  
1.34  
1.34  
1.33  
1.33  
1.31  
1.31  
1.30  
1.30  
1.30  
1.28  
1.28  
1.26  
1.25  
1.25  
1.24  
1.24  
1.24  
1.23  
1.23  
1.22  
1.22  
1.21  
1.21  
1.20  
1.20  
1.19  
1.19  
1.18  
1.18  
1.16  
1.16  
1.15  
1.13  
1.13  
1.12  
1.11  
1.11  
1.00  
0.98  
0.88  
0.85  
0.84  
0.83  
0.69  
0.69  
0.68

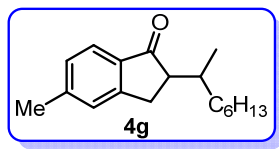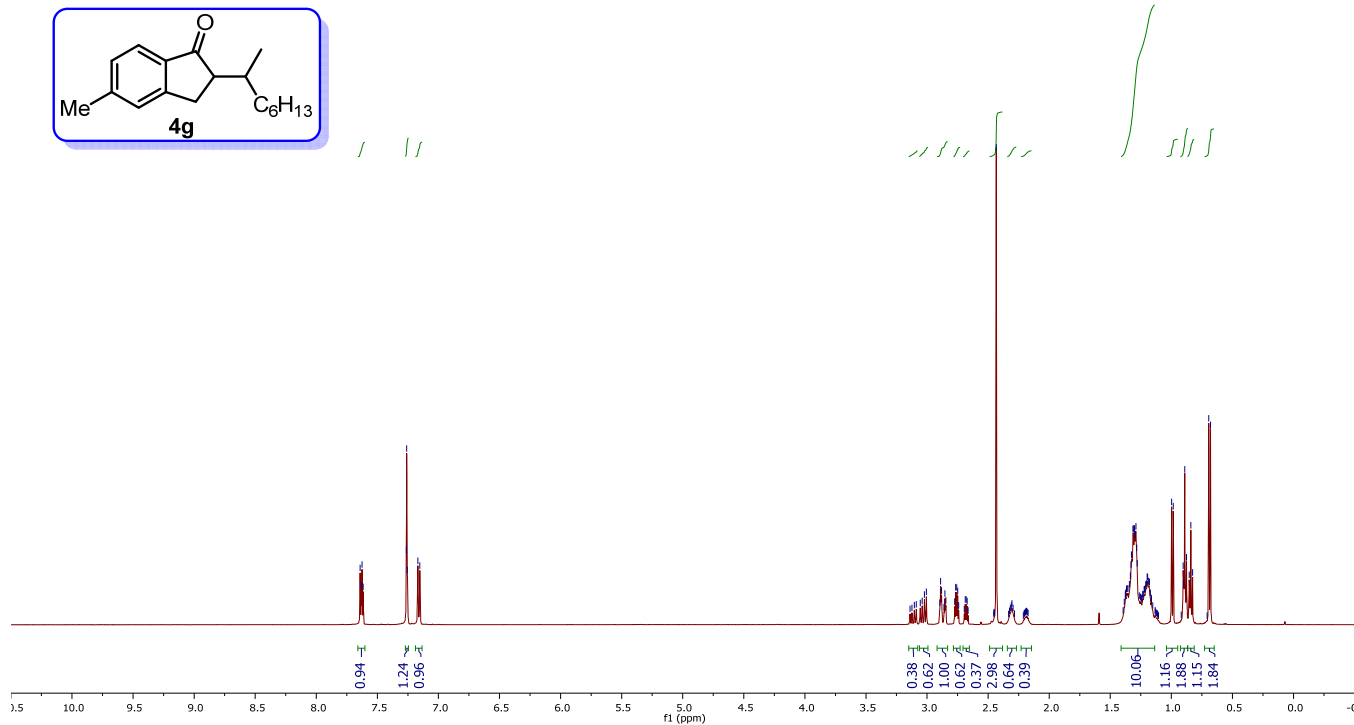

208.90  
208.33  
154.90  
154.66  
145.61  
145.55  
135.57  
135.52  
128.46  
126.82  
126.78  
126.74  
123.39  
77.32  
77.06  
76.68  
53.02  
51.62  
35.42  
34.38  
33.77  
33.47  
31.87  
31.82  
29.44  
29.34  
27.37  
27.34  
22.66  
22.66  
17.76  
14.51  
14.10  
14.06

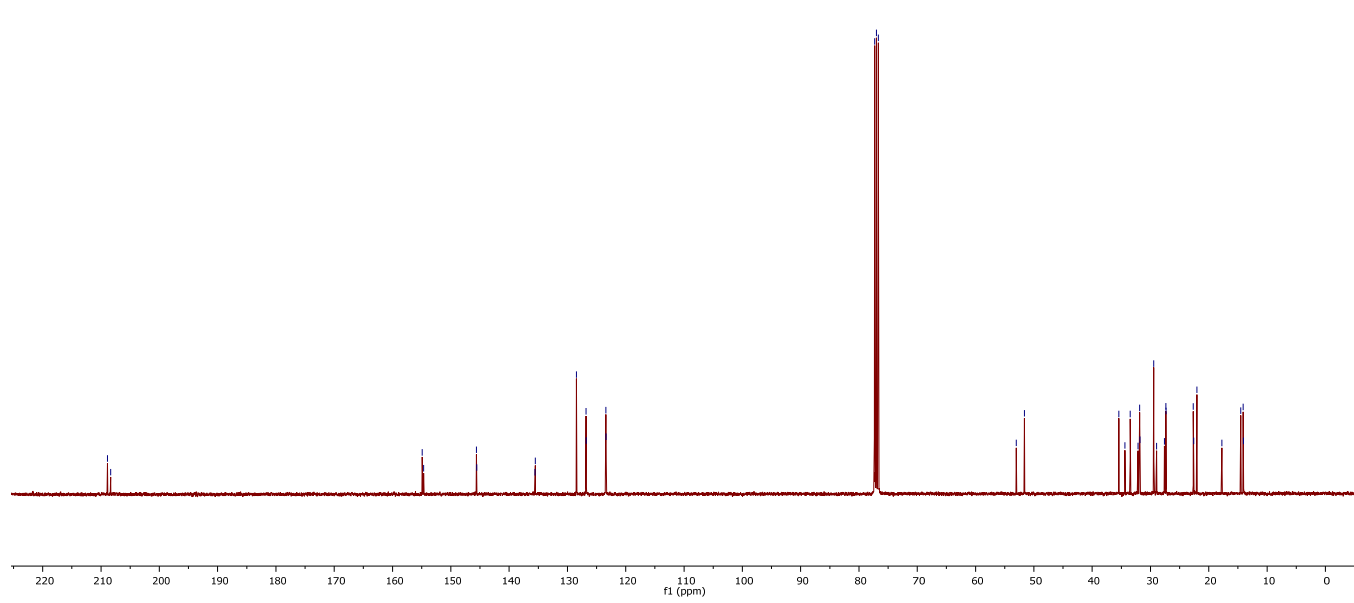

7.26  
7.23  
7.20  
7.17  
7.14  
7.11  
7.08  
7.05  
7.02  
6.99  
6.96  
6.93  
6.90  
6.87  
6.84  
6.81  
6.78  
6.75  
6.72  
6.69  
6.66  
6.63  
6.60  
6.57  
6.54  
6.51  
6.48  
6.45  
6.42  
6.39  
6.36  
6.33  
6.30  
6.27  
6.24  
6.21  
6.18  
6.15  
6.12  
6.09  
6.06  
6.03  
6.00  
5.97  
5.94  
5.91  
5.88  
5.85  
5.82  
5.79  
5.76  
5.73  
5.70  
5.67  
5.64  
5.61  
5.58  
5.55  
5.52  
5.49  
5.46  
5.43  
5.40  
5.37  
5.34  
5.31  
5.28  
5.25  
5.22  
5.19  
5.16  
5.13  
5.10  
5.07  
5.04  
5.01  
4.98  
4.95  
4.92  
4.89  
4.86  
4.83  
4.80  
4.77  
4.74  
4.71  
4.68  
4.65  
4.62  
4.59  
4.56  
4.53  
4.50  
4.47  
4.44  
4.41  
4.38  
4.35  
4.32  
4.29  
4.26  
4.23  
4.20  
4.17  
4.14  
4.11  
4.08  
4.05  
4.02  
3.99  
3.96  
3.93  
3.90  
3.87  
3.84  
3.81  
3.78  
3.75  
3.72  
3.69  
3.66  
3.63  
3.60  
3.57  
3.54  
3.51  
3.48  
3.45  
3.42  
3.39  
3.36  
3.33  
3.30  
3.27  
3.24  
3.21  
3.18  
3.15  
3.12  
3.09  
3.06  
3.03  
3.00  
2.97  
2.94  
2.91  
2.88  
2.85  
2.82  
2.79  
2.76  
2.73  
2.70  
2.67  
2.64  
2.61  
2.58  
2.55  
2.52  
2.49  
2.46  
2.43  
2.40  
2.37  
2.34  
2.31  
2.28  
2.25  
2.22  
2.19  
2.16  
2.13  
2.10  
2.07  
2.04  
2.01  
1.98  
1.95  
1.92  
1.89  
1.86  
1.83  
1.80  
1.77  
1.74  
1.71  
1.68  
1.65  
1.62  
1.59  
1.56  
1.53  
1.50  
1.47  
1.44  
1.41  
1.38  
1.35  
1.32  
1.29  
1.26  
1.23  
1.20  
1.17  
1.14  
1.11  
1.08  
1.05  
1.02  
0.99  
0.96  
0.93  
0.90  
0.87  
0.84  
0.81  
0.78  
0.75  
0.72  
0.69  
0.66  
0.63  
0.60  
0.57  
0.54  
0.51  
0.48  
0.45  
0.42  
0.39  
0.36  
0.33  
0.30  
0.27  
0.24  
0.21  
0.18  
0.15  
0.12  
0.09  
0.06  
0.03  
0.00

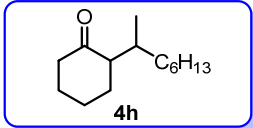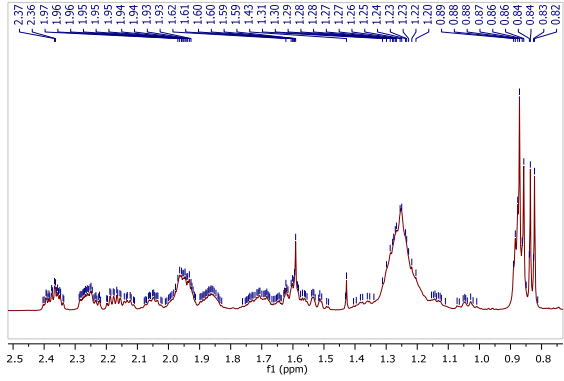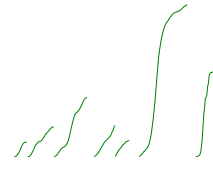

1.5  
1.0  
0.5  
0.0  
-0.5  
-1.0  
-1.5  
-2.0  
-2.5  
-3.0  
-3.5  
-4.0  
-4.5  
-5.0  
-5.5  
-6.0  
-6.5  
-7.0  
-7.5  
-8.0  
-8.5  
-9.0  
-9.5  
-10.0  
-10.5

1.00  
2.05  
4.07  
2.15  
1.10  
10.40  
5.81

213.40  
213.34

77.32  
76.68

56.41  
55.28

42.07  
42.02  
34.83  
33.13  
31.90  
31.77  
31.72  
29.63  
29.49  
29.18  
29.14  
27.75  
27.57  
27.34  
27.17  
27.13  
24.30  
22.68  
22.66  
17.47  
14.96

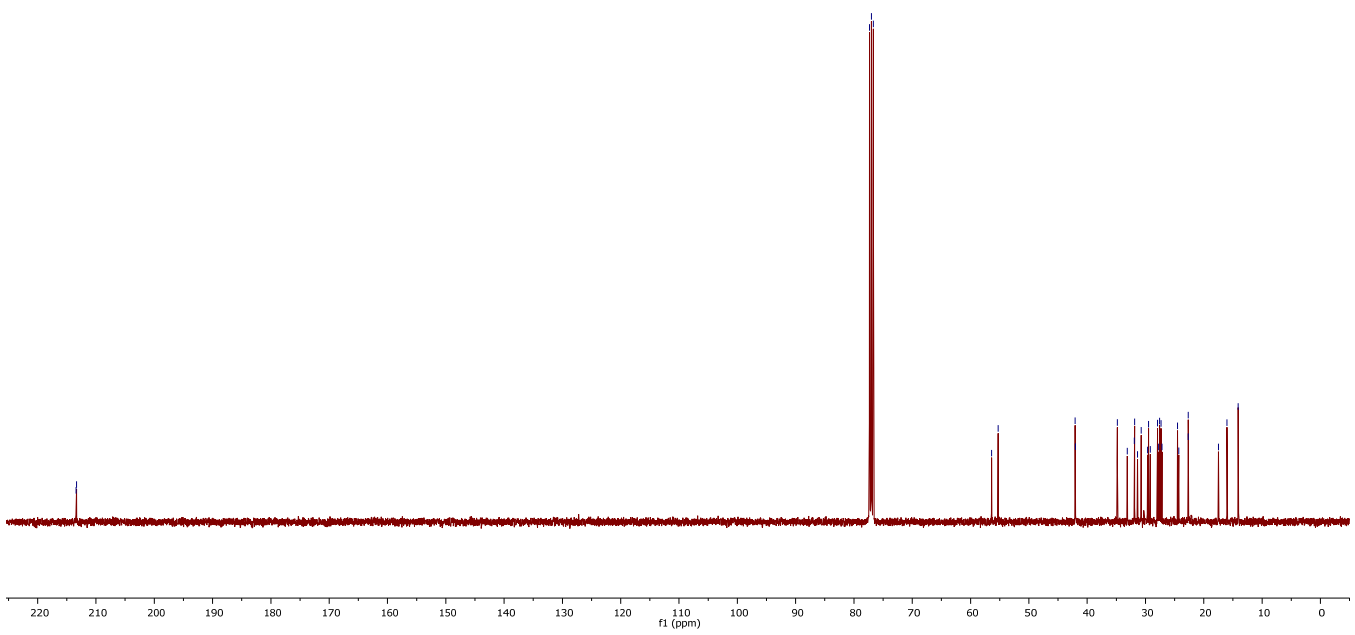

7.84  
7.83  
7.82  
7.40  
7.32  
7.30  
7.26  
7.25  
7.24  
7.20  
7.19  
7.17  
7.16  
7.07  
7.06  
6.50  
6.49  
6.48  
4.43  
4.43  
4.43  
4.16  
4.14  
4.14  
3.75  
3.72  
3.18  
3.16  
3.16  
3.14  
3.14  
3.12  
3.11  
2.95  
2.94  
2.94  
2.91  
1.90  
1.90  
1.89  
1.88  
1.88  
1.87  
1.86  
1.86  
1.86  
1.85  
1.85  
1.84  
1.84  
1.83  
1.83  
1.81  
1.81  
1.77  
1.76  
1.75  
1.65  
1.65  
1.64  
1.63  
1.63  
1.62  
1.62  
1.46  
1.45  
1.45  
1.44  
1.43  
1.43  
1.42  
1.41  
1.41  
1.40  
1.39  
1.39  
1.38  
1.37  
1.36  
1.36  
1.35  
1.34  
1.32  
1.30  
1.29  
1.29  
1.26  
1.26  
1.25  
1.24  
1.24  
1.21  
1.20  
1.20  
1.19  
1.17  
1.15  
0.88  
0.87  
0.85  
0.84  
0.43  
0.42

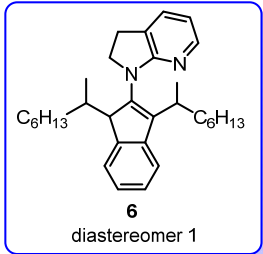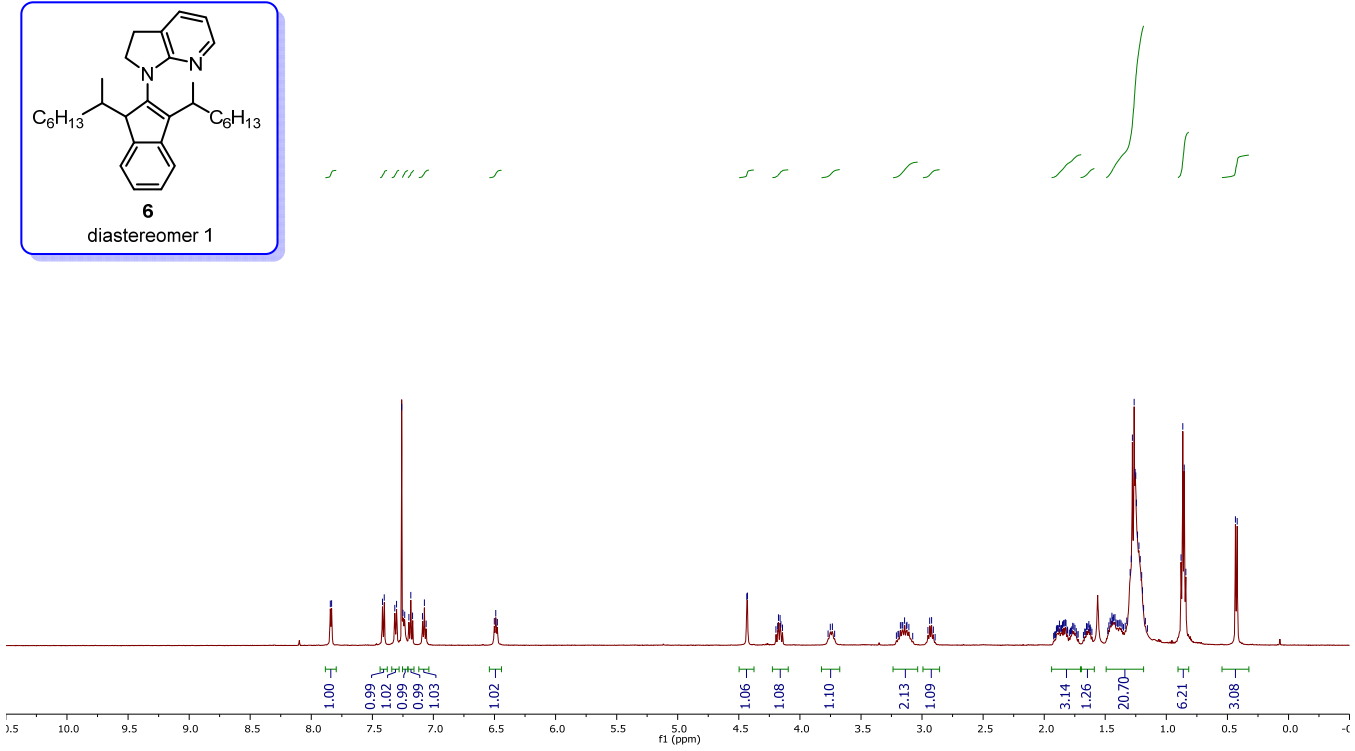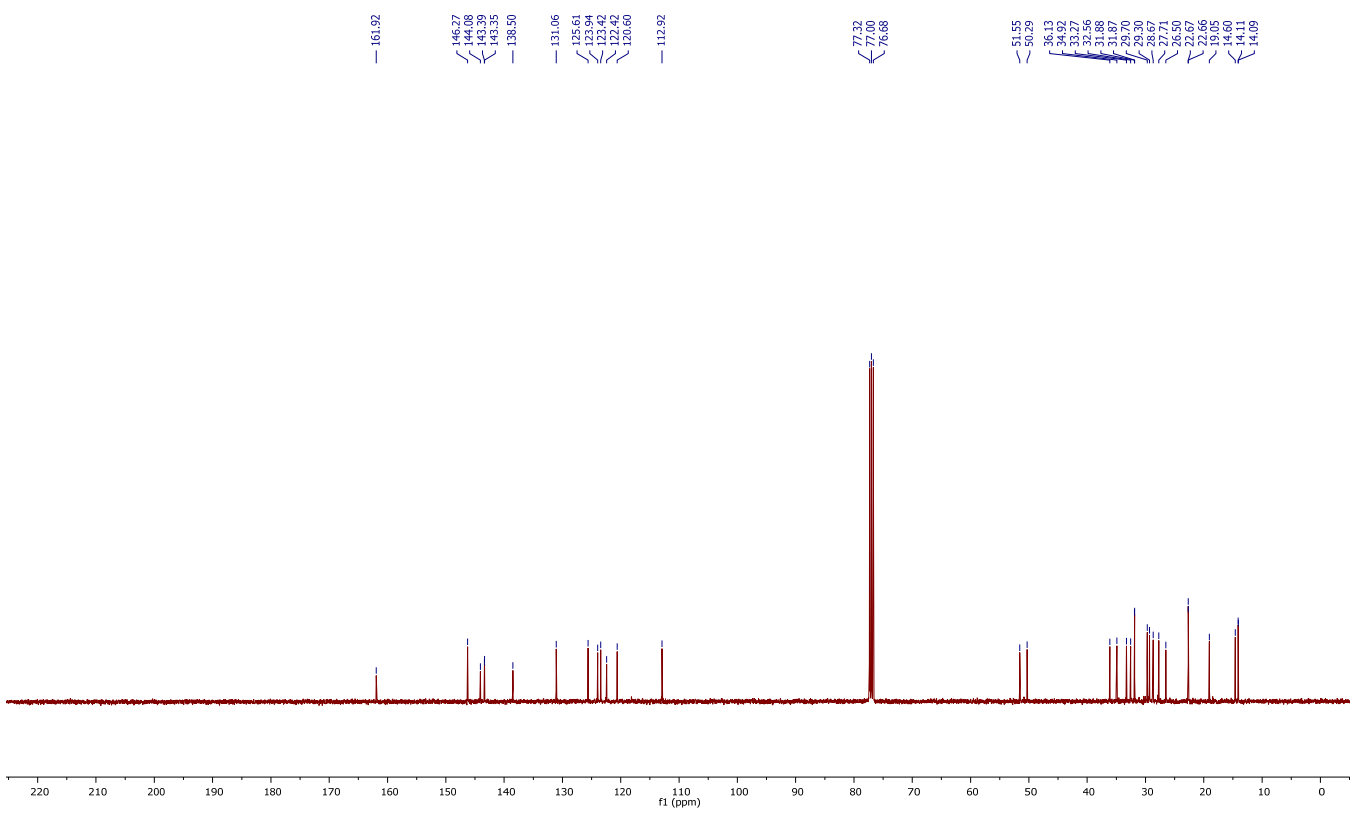

7.83  
7.82  
7.82  
7.82  
7.42  
7.41  
7.36  
7.36  
7.26  
7.24  
7.23  
7.23  
7.20  
7.20  
7.17  
7.17  
7.10  
7.09  
7.09  
6.97  
6.98  
6.47  
6.46  
4.30  
4.30  
4.19  
4.18  
4.17  
4.16  
4.15  
4.14  
4.14  
3.74  
3.74  
3.72  
3.72  
3.17  
3.15  
3.15  
3.13  
3.13  
3.11  
3.11  
2.94  
2.93  
2.91  
2.90  
1.91  
1.91  
1.90  
1.90  
1.89  
1.88  
1.88  
1.87  
1.87  
1.86  
1.86  
1.75  
1.74  
1.74  
1.73  
1.73  
1.42  
1.41  
1.41  
1.32  
1.32  
1.31  
1.31  
1.30  
1.30  
1.29  
1.29  
1.28  
1.27  
1.26  
1.26  
1.24  
1.24  
1.23  
1.22  
1.22  
1.20  
1.20  
1.18  
1.18  
1.17  
1.16  
1.16  
1.12  
1.12  
1.11  
1.11  
1.10  
1.10  
1.09  
1.09  
1.08  
1.06  
1.04  
1.04  
1.02  
1.02  
1.01  
1.01  
1.00  
1.00  
0.99  
0.99  
0.87  
0.85  
0.84  
0.83  
0.81  
0.81

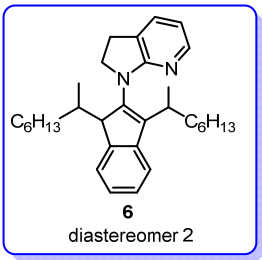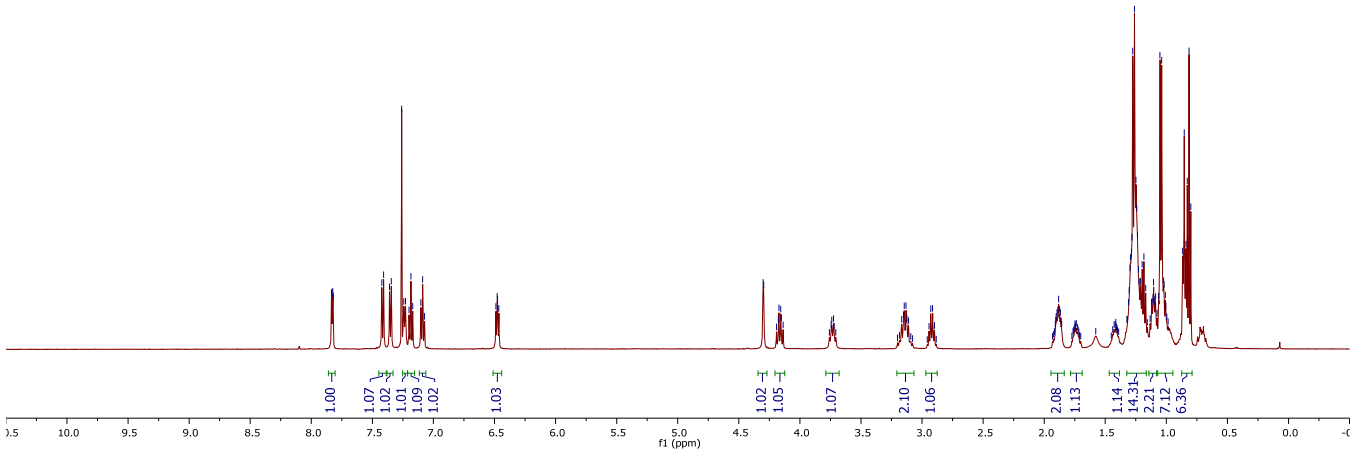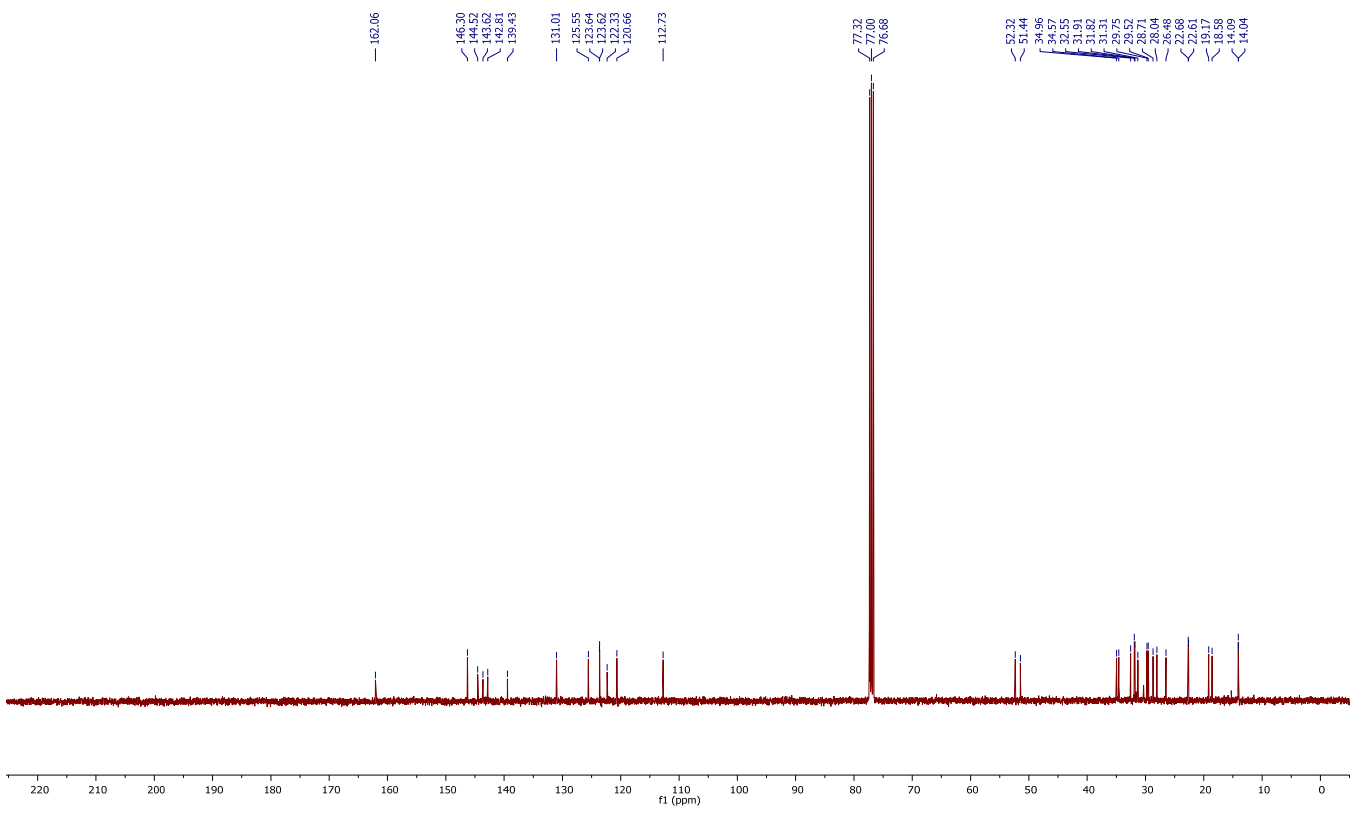

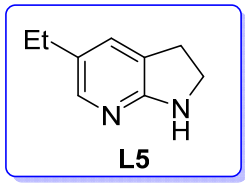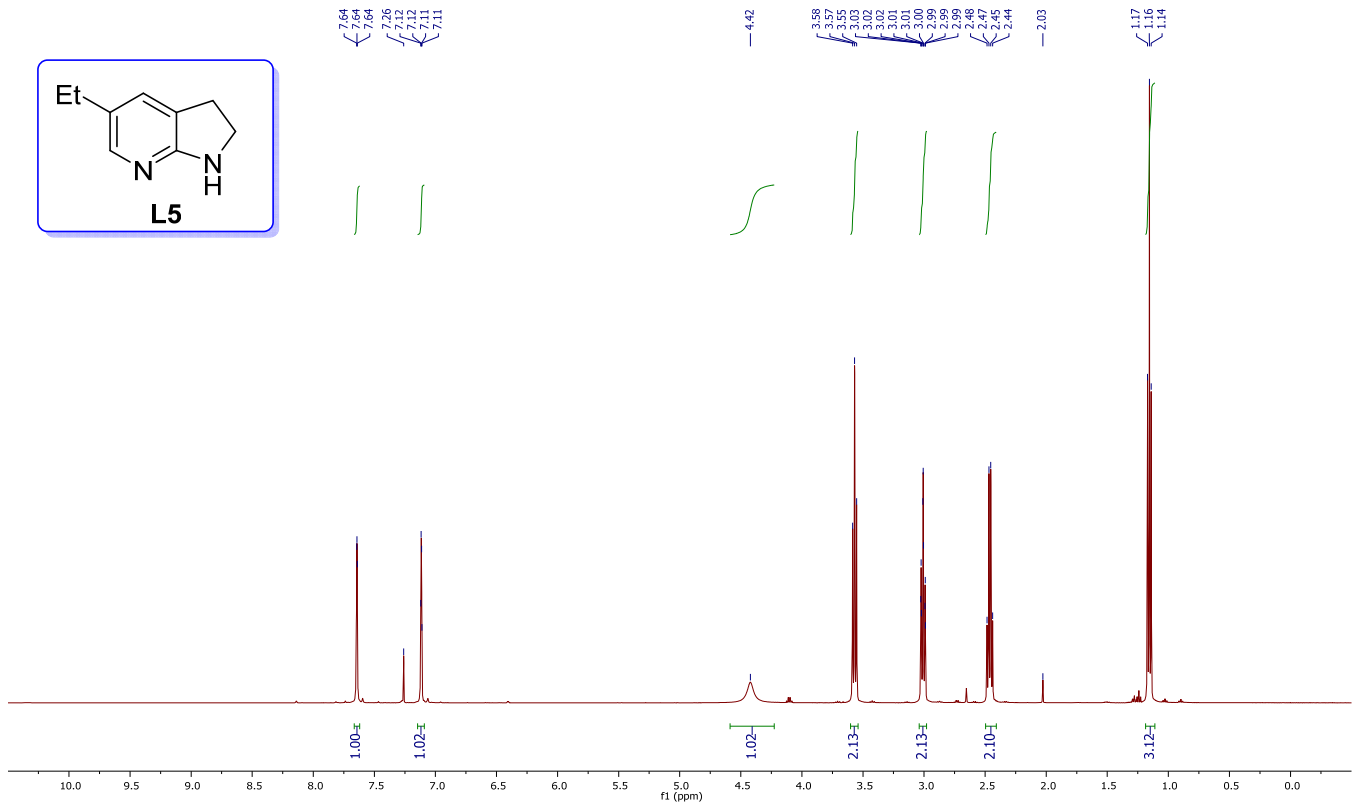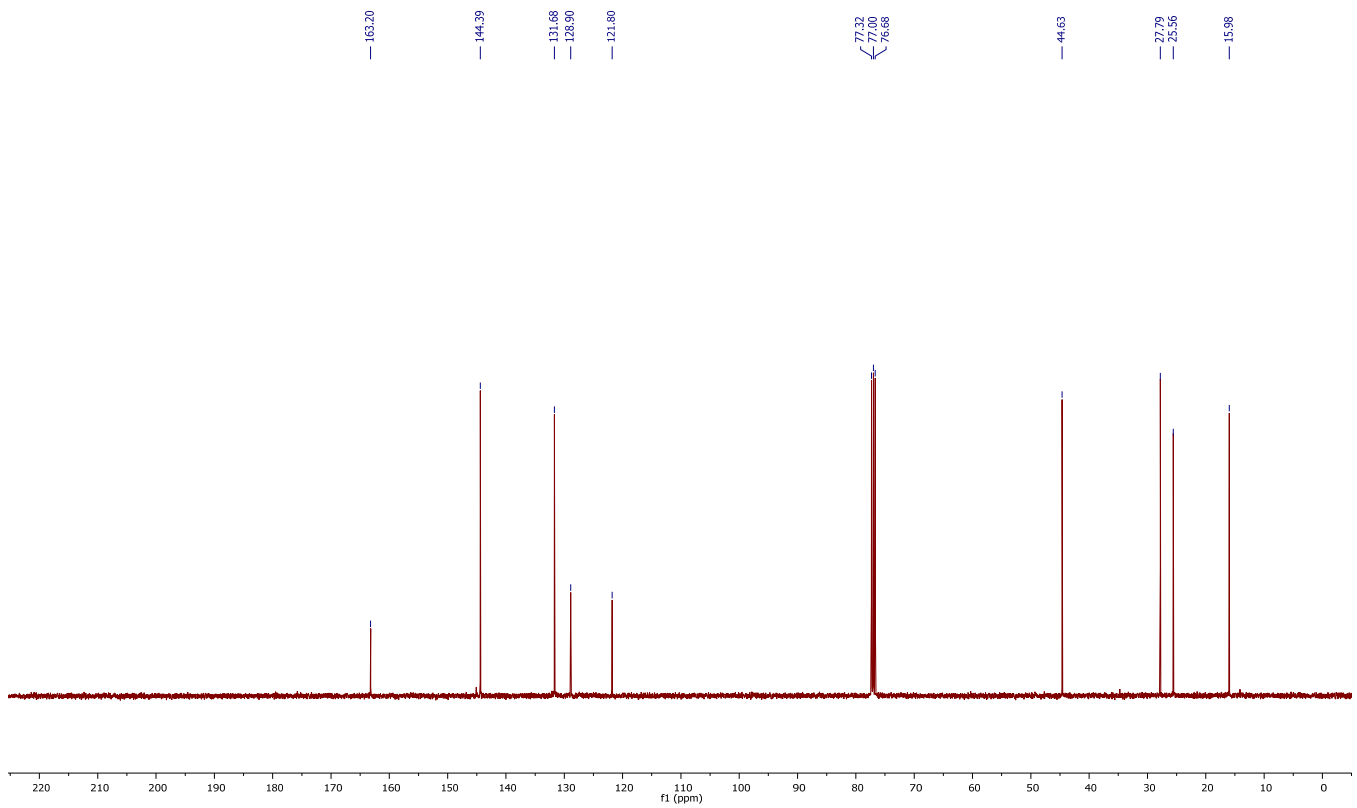

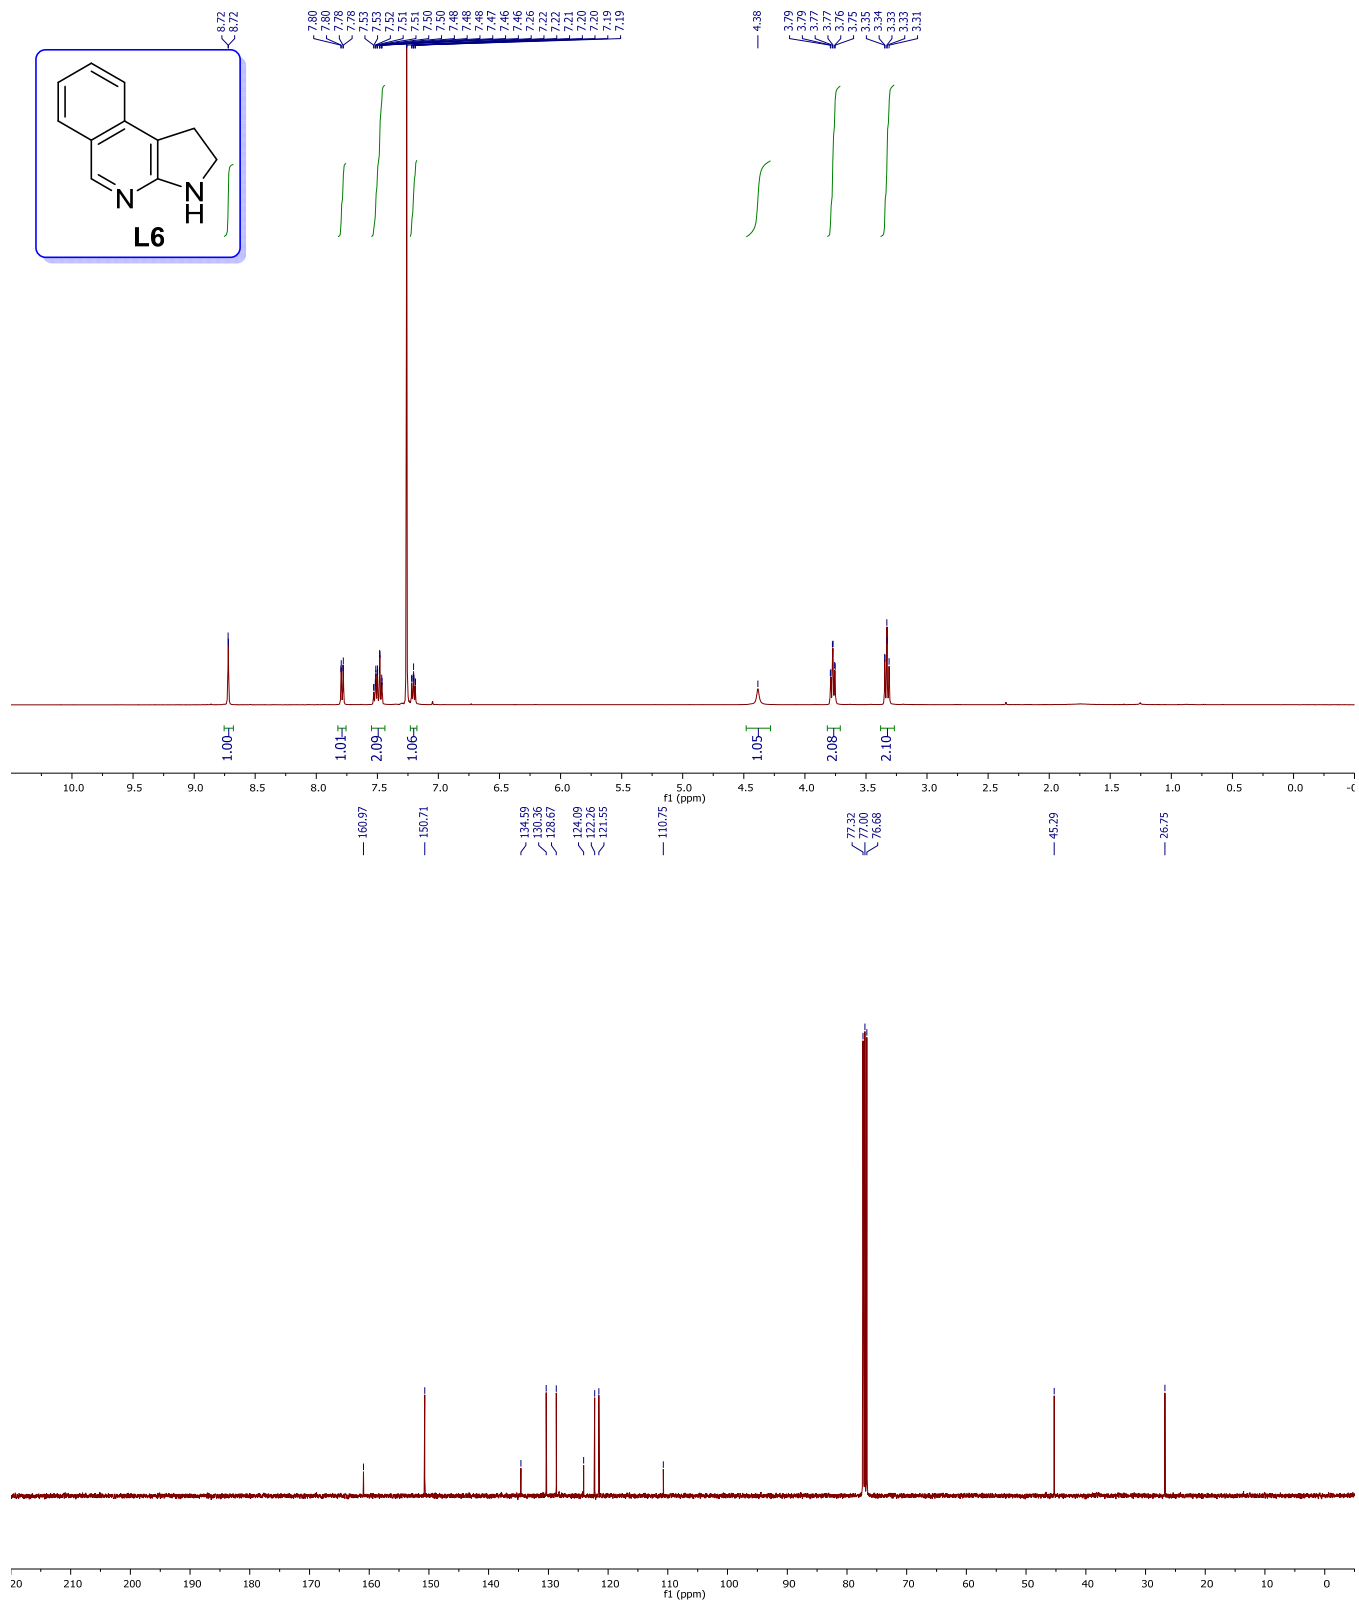





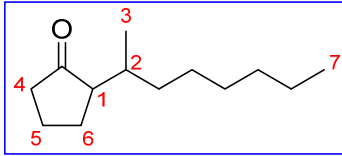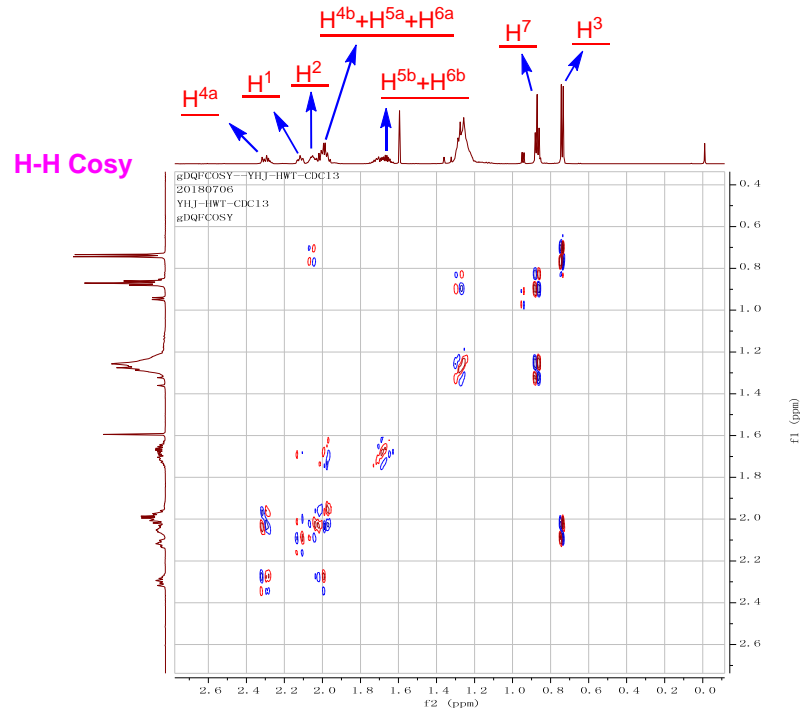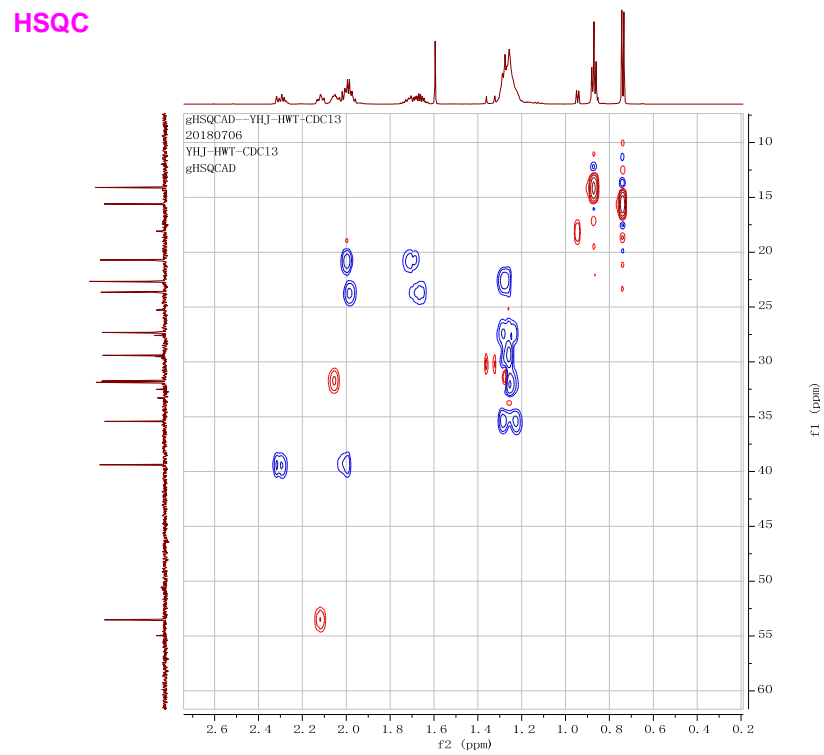



## 7 Density Functional Theory (DFT) Study

### 7.1 Complete Reference for Gaussian 09

*Gaussian 09*, Revision D.01, Frisch, M. J.; Trucks, G. W.; Schlegel, H. B.; Scuseria, G. E.; Robb, M. A.; Cheeseman, J. R.; Scalmani, G.; Barone, V.; Mennucci, B.; Petersson, G. A.; Nakatsuji, H.; Caricato, M.; Li, X.; Hratchian, H. P.; Izmaylov, A. F.; Bloino, J.; Zheng, G.; Sonnenberg, J. L.; Hada, M.; Ehara, M.; Toyota, K.; Fukuda, R.; Hasegawa, J.; Ishida, M.; Nakajima, T.; Honda, Y.; Kitao, O.; Nakai, H.; Vreven, T.; Montgomery, Jr., J. A.; Peralta, J. E.; Ogliaro, F.; Bearpark, M.; Heyd, J. J.; Brothers, E.; Kudin, K. N.; Staroverov, V. N.; Kobayashi, R.; Normand, J.; Raghavachari, K.; Rendell, A.; Burant, J. C.; Iyengar, S. S.; Tomasi, J.; Cossi, M.; Rega, N.; Millam, N. J.; Klene, M.; Knox, J. E.; Cross, J. B.; Bakken, V.; Adamo, C.; Jaramillo, J.; Gomperts, R.; Stratmann, R. E.; Yazyev, O.; Austin, A. J.; Cammi, R.; Pomelli, C.; Ochterski, J. W.; Martin, R. L.; Morokuma, K.; Zakrzewski, V. G.; Voth, G. A.; Salvador, P.; Dannenberg, J. J.; Dapprich, S.; Daniels, A. D.; Farkas, Ö.; Foresman, J. B.; Ortiz, J. V.; Cioslowski, J.; Fox, D. J. Gaussian, Inc., Wallingford CT, **2013**.

### 7.2 Computational Methods

Geometry optimizations and single-point energy calculations were carried out using Gaussian 09. The geometries of intermediates and transition states were optimized using the B3LYP functional<sup>15</sup> with a mixed basis set of SDD for Ir and 6-31G(d) for other atoms in the gas phase. Vibrational frequency calculations were performed for all the stationary points to confirm if each optimized structure is a local minimum or a transition state structure. Solvation energy corrections were calculated in cyclopentanone solvent with the SMD continuum solvation model<sup>16</sup> based on the gas-phase optimized geometries. The DFT-D3(BJ) method

developed by Grimme and co-workers<sup>17</sup> with a mixed basis set of SDD for Ir and 6-311+G(d,p) for other atoms was used for solvation single-point energy calculations.

### 7.3 Complete free energy profiles of the reaction pathways shown in Figure 1

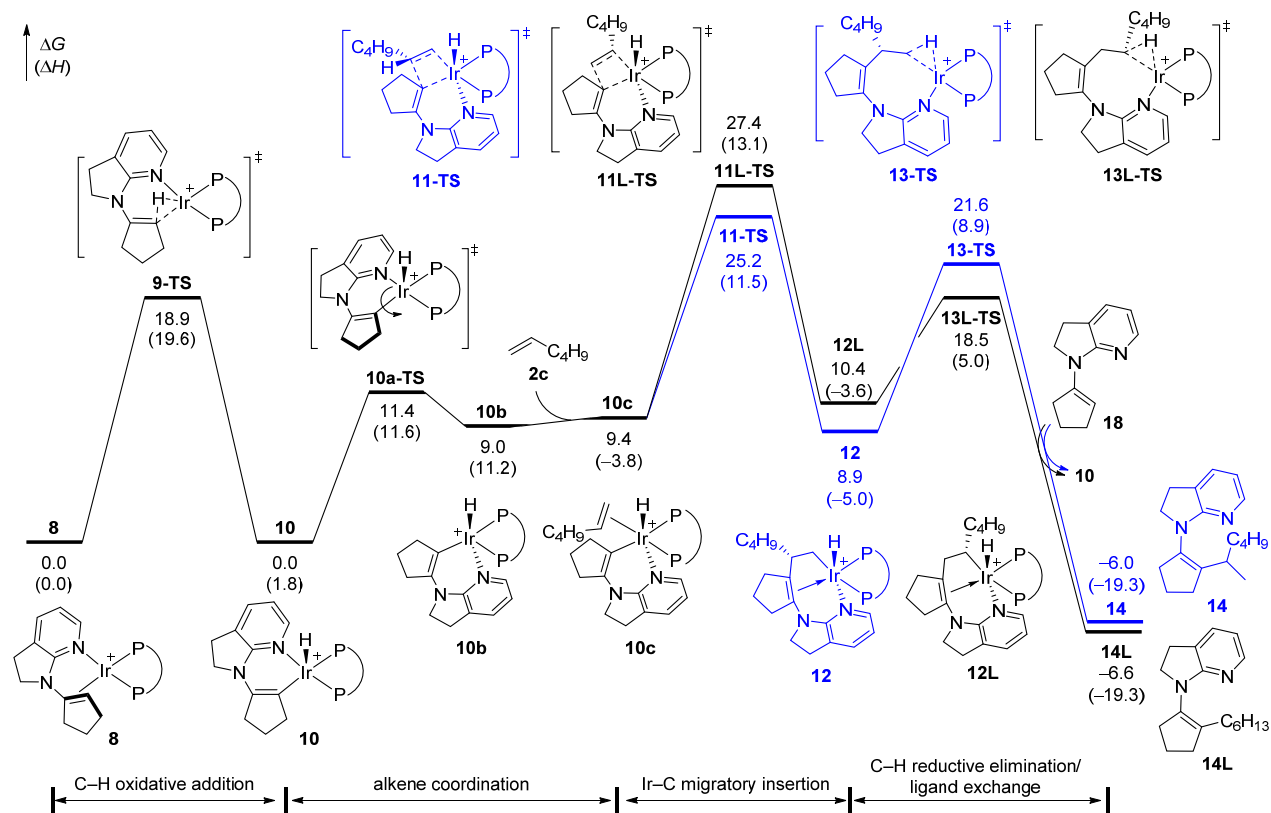

Figure S1. Free energy profile of Ir-C migratory insertion pathways to form the branched and linear alkylation products (shown in blue and black, respectively). The (S)-BINAP ligand was used in calculation. All energies are in kcal/mol and were performed at the B3LYP-D3(BJ)/6-311+G(d,p)-SDD/SMD(cyclopentanone)//B3LYP/6-31G(d)-SDD level of theory.

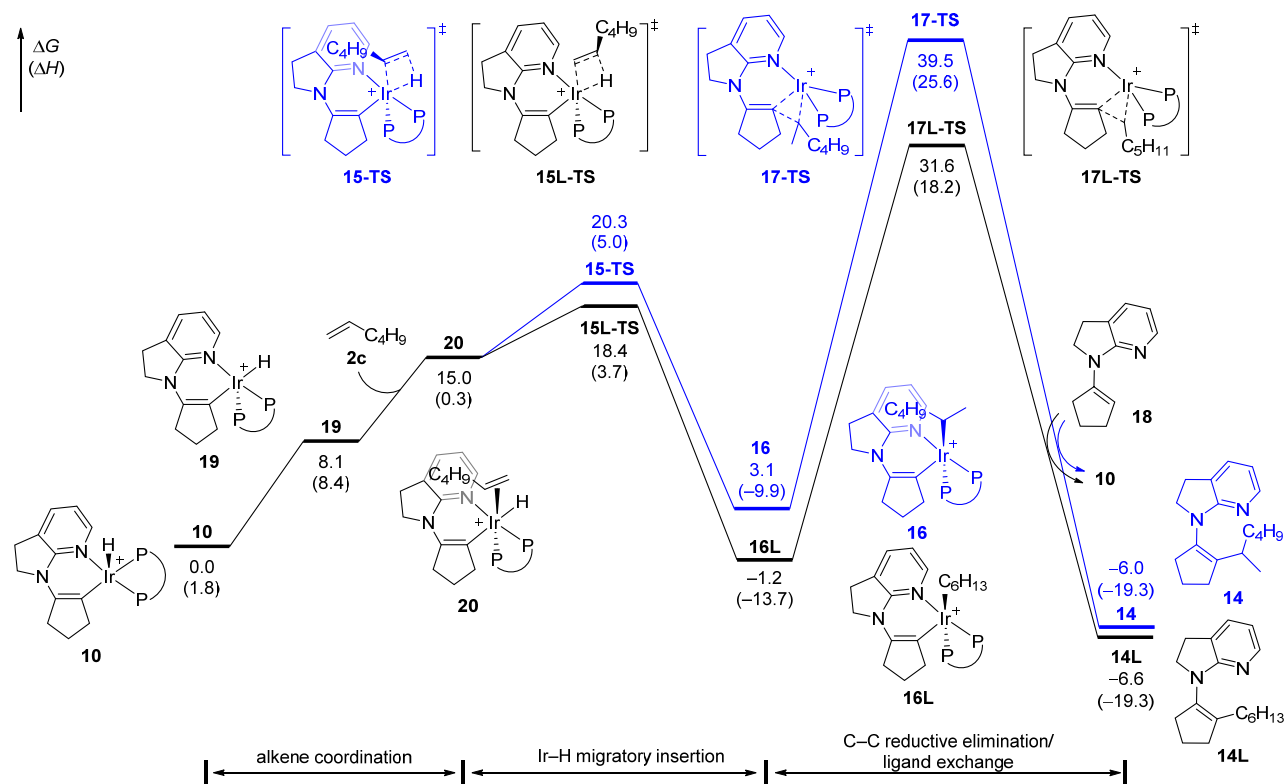

Figure S2. Free energy profile of Ir-H migratory insertion pathways to form the branched and linear alkylation products (shown in blue and black, respectively). The (*S*)-BINAP ligand was used in calculation. All energies are in kcal/mol and were performed at the B3LYP-D3(BJ)/6-311+G(d,p)-SDD/SMD(cyclopentanone)//B3LYP/6-31G(d)-SDD level of theory.

#### 7.4 Other possible Ir-H or Ir-C insertion pathways from different configurations of Ir(III)-hydride complexes



effect of hydride suppressed the alkene insertion, thus result in the high activation free energy of **25-TS** (42.5 kcal/mol). Therefore, these possible reaction pathways could be ruled out in this reaction. These results are consistent with Huang's work.<sup>18</sup>

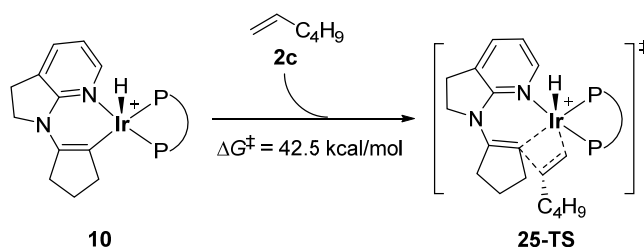

Figure S4. The Ir–C migratory insertion from intermediate **12**. The biphosphine ligand used in calculation is (*S*)-BINAP.

## 7.5 Cartesian coordinates and energies of optimized structures

### 2c

B3LYP SCF energy: -235.84430838 a.u.

B3LYP enthalpy: -235.669191 a.u.

B3LYP free energy: -235.710183 a.u.

B3LYP-D3(BJ) SCF energy in solution: -235.94575929 a.u.

B3LYP-D3(BJ) enthalpy in solution: -235.770642 a.u.

B3LYP-D3(BJ) free energy in solution: -235.811634 a.u.

### Cartesian coordinates

| ATOM | X         | Y         | Z         |
|------|-----------|-----------|-----------|
| C    | 3.088717  | -0.176480 | -0.440044 |
| H    | 3.096365  | 0.455824  | -1.326095 |
| C    | 2.045666  | -0.203765 | 0.390784  |
| H    | 2.083984  | -0.856003 | 1.265709  |
| C    | 0.777206  | 0.588104  | 0.222563  |
| H    | 0.862902  | 1.240581  | -0.656730 |
| H    | 0.643176  | 1.250766  | 1.092101  |
| C    | -0.474134 | -0.300900 | 0.088728  |
| H    | -0.539141 | -0.970111 | 0.959439  |
| H    | -0.358396 | -0.952511 | -0.788548 |
| C    | -1.776351 | 0.501021  | -0.033032 |
| H    | -1.883026 | 1.153325  | 0.845572  |

|   |           |           |           |
|---|-----------|-----------|-----------|
| H | -1.709304 | 1.170616  | -0.902311 |
| C | -3.019446 | -0.385080 | -0.165847 |
| H | -3.134210 | -1.040508 | 0.706375  |
| H | -3.931739 | 0.216212  | -0.252812 |
| H | -2.956652 | -1.025654 | -1.054193 |
| H | 3.976095  | -0.779936 | -0.267420 |

## 8

B3LYP SCF energy: -3058.13057527 a.u.

B3LYP enthalpy: -3057.210058 a.u.

B3LYP free energy: -3057.345829 a.u.

B3LYP-D3(BJ) SCF energy in solution: -3059.23437508 a.u.

B3LYP-D3(BJ) enthalpy in solution: -3058.313858 a.u.

B3LYP-D3(BJ) free energy in solution: -3058.449629 a.u.

### Cartesian coordinates

| ATOM | X        | Y         | Z         |
|------|----------|-----------|-----------|
| C    | 5.303907 | -2.884406 | -1.175392 |
| C    | 4.332793 | -2.167297 | -0.512883 |
| C    | 3.646935 | -1.089951 | -1.147180 |
| C    | 3.994454 | -0.791568 | -2.504291 |
| C    | 5.002401 | -1.547651 | -3.161397 |
| C    | 5.649326 | -2.572489 | -2.512125 |
| H    | 5.812049 | -3.698220 | -0.665605 |
| H    | 4.086937 | -2.428323 | 0.509110  |
| C    | 2.629608 | -0.314808 | -0.480976 |
| C    | 3.322710 | 0.266705  | -3.158581 |
| H    | 5.252437 | -1.297048 | -4.189149 |
| H    | 6.421594 | -3.143640 | -3.019263 |
| C    | 2.343728 | 0.984782  | -2.517500 |
| C    | 1.967833 | 0.705847  | -1.172619 |
| H    | 3.594258 | 0.514059  | -4.181885 |
| H    | 1.866484 | 1.793111  | -3.053133 |
| C    | 2.352859 | -0.636402 | 0.959496  |
| C    | 3.366339 | -0.330493 | 1.935849  |
| C    | 1.181173 | -1.283584 | 1.358862  |
| C    | 4.574440 | 0.347968  | 1.602918  |
| C    | 3.173367 | -0.716178 | 3.302522  |
| C    | 1.015177 | -1.660834 | 2.721236  |
| C    | 5.530760 | 0.610742  | 2.558076  |
| H    | 4.742879 | 0.662072  | 0.579820  |
| C    | 4.178895 | -0.431234 | 4.265305  |
| C    | 1.981118 | -1.390749 | 3.659100  |
| H    | 0.121176 | -2.187003 | 3.028899  |



|   |           |           |           |
|---|-----------|-----------|-----------|
| C | 5.337130  | 0.215838  | 3.903421  |
| H | 6.444425  | 1.126608  | 2.276433  |
| H | 4.014264  | -0.738492 | 5.294964  |
| H | 1.839110  | -1.703322 | 4.690702  |
| H | 6.103073  | 0.425399  | 4.644526  |
| P | 0.551211  | 1.680133  | -0.413298 |
| P | -0.227396 | -1.546028 | 0.173388  |
| C | 0.382623  | 3.102488  | -1.589959 |
| C | -0.258789 | 2.849791  | -2.817825 |
| C | 0.824189  | 4.405181  | -1.323415 |
| C | -0.422751 | 3.861171  | -3.762656 |
| H | -0.647120 | 1.855628  | -3.024764 |
| C | 0.644518  | 5.423513  | -2.265230 |
| H | 1.296459  | 4.643752  | -0.377766 |
| C | 0.030488  | 5.154867  | -3.487818 |
| H | -0.914521 | 3.642924  | -4.706530 |
| H | 0.988245  | 6.428372  | -2.036636 |
| H | -0.102391 | 5.947049  | -4.218982 |
| C | 1.295048  | 2.376615  | 1.120090  |
| C | 0.642107  | 2.198363  | 2.347138  |
| C | 2.515690  | 3.072740  | 1.093785  |
| C | 1.177176  | 2.732350  | 3.520355  |
| H | -0.275286 | 1.620395  | 2.376824  |
| C | 3.042754  | 3.616556  | 2.264925  |
| H | 3.061337  | 3.184662  | 0.161258  |
| C | 2.371943  | 3.452332  | 3.479274  |
| H | 0.662824  | 2.582181  | 4.465504  |
| H | 3.983576  | 4.158287  | 2.230645  |
| H | 2.787197  | 3.872687  | 4.390693  |
| C | -1.354481 | -2.714377 | 1.071674  |
| C | -2.172378 | -2.192491 | 2.090736  |
| C | -1.436417 | -4.084074 | 0.783264  |
| C | -3.021924 | -3.023191 | 2.820288  |
| H | -2.146465 | -1.127930 | 2.306476  |
| C | -2.299782 | -4.912480 | 1.506477  |
| H | -0.834569 | -4.516624 | -0.007265 |
| C | -3.088059 | -4.388752 | 2.530069  |
| H | -3.634902 | -2.602596 | 3.613038  |
| H | -2.349458 | -5.970862 | 1.266356  |
| H | -3.751998 | -5.036546 | 3.095449  |
| C | 0.463209  | -2.547462 | -1.209975 |
| C | 1.288486  | -3.660147 | -0.977679 |
| C | 0.132770  | -2.212514 | -2.532113 |
| C | 1.748003  | -4.433518 | -2.043748 |
| H | 1.579402  | -3.918968 | 0.036440  |
| C | 0.595764  | -2.985464 | -3.598573 |

|    |           |           |           |
|----|-----------|-----------|-----------|
| H  | -0.472092 | -1.329731 | -2.725551 |
| C  | 1.398610  | -4.100863 | -3.354813 |
| H  | 2.386609  | -5.290616 | -1.850916 |
| H  | 0.335794  | -2.711590 | -4.617262 |
| H  | 1.760115  | -4.703509 | -4.183028 |
| C  | -6.275593 | -0.323103 | 1.155753  |
| C  | -5.421271 | 0.942087  | 1.464929  |
| H  | -7.292536 | -0.059785 | 0.851131  |
| H  | -6.354621 | -0.964275 | 2.042996  |
| H  | -5.797820 | 1.810567  | 0.906559  |
| H  | -5.404960 | 1.190218  | 2.527494  |
| C  | -5.471781 | -1.013668 | 0.075830  |
| C  | -4.198905 | -0.432305 | 0.076649  |
| C  | -5.706363 | -2.035008 | -0.823293 |
| H  | -6.671666 | -2.529432 | -0.886150 |
| C  | -4.650605 | -2.417145 | -1.678787 |
| H  | -4.786870 | -3.210583 | -2.404972 |
| C  | -3.419821 | -1.784919 | -1.590762 |
| H  | -2.589273 | -2.074244 | -2.222409 |
| N  | -3.176954 | -0.783489 | -0.705346 |
| N  | -4.055142 | 0.589976  | 0.978251  |
| C  | -3.107660 | 1.611980  | 0.612091  |
| C  | -2.940058 | 2.108469  | -0.704256 |
| H  | -3.521517 | 1.721748  | -1.539219 |
| C  | -2.859584 | 2.701384  | 1.638037  |
| H  | -3.838306 | 3.028648  | 2.020665  |
| H  | -2.282230 | 2.369732  | 2.505614  |
| C  | -2.201311 | 3.835898  | 0.829304  |
| H  | -2.464003 | 4.826817  | 1.210886  |
| H  | -1.114083 | 3.748061  | 0.881655  |
| C  | -2.685668 | 3.608779  | -0.618044 |
| H  | -3.657585 | 4.104599  | -0.771138 |
| H  | -2.007147 | 4.016658  | -1.365597 |
| Ir | -1.417301 | 0.424263  | -0.367948 |

## 9-TS

B3LYP SCF energy: -3058.09317076 a.u.

B3LYP enthalpy: -3057.177462 a.u.

B3LYP free energy: -3057.314338 a.u.

B3LYP-D3(BJ) SCF energy in solution: -3059.19826898 a.u.

B3LYP-D3(BJ) enthalpy in solution: -3058.282560 a.u.

B3LYP-D3(BJ) free energy in solution: -3058.419436 a.u.

Imaginary frequency: -846.4266 cm<sup>-1</sup>

Cartesian coordinates

| ATOM | X         | Y         | Z         |
|------|-----------|-----------|-----------|
| C    | 6.196539  | 0.925592  | 1.231702  |
| C    | 5.018928  | 0.685790  | 0.558946  |
| C    | 4.024472  | -0.181929 | 1.098336  |
| C    | 4.282556  | -0.779682 | 2.374255  |
| C    | 5.513386  | -0.524919 | 3.037073  |
| C    | 6.454263  | 0.309146  | 2.480031  |
| H    | 6.936653  | 1.592942  | 0.799337  |
| H    | 4.843739  | 1.167291  | -0.395995 |
| C    | 2.777865  | -0.443703 | 0.427002  |
| C    | 3.287264  | -1.600699 | 2.955121  |
| H    | 5.692625  | -0.996602 | 3.999894  |
| H    | 7.391099  | 0.501269  | 2.994919  |
| C    | 2.086539  | -1.808239 | 2.322818  |
| C    | 1.808605  | -1.236519 | 1.049031  |
| H    | 3.478589  | -2.060299 | 3.921509  |
| H    | 1.343920  | -2.428408 | 2.806822  |
| C    | 2.562115  | 0.153631  | -0.931185 |
| C    | 3.347536  | -0.335496 | -2.040033 |
| C    | 1.625078  | 1.162098  | -1.147286 |
| C    | 4.307870  | -1.377420 | -1.901115 |
| C    | 3.163376  | 0.230019  | -3.343574 |
| C    | 1.423633  | 1.671864  | -2.466289 |
| C    | 5.055663  | -1.806881 | -2.975901 |
| H    | 4.455697  | -1.838759 | -0.932335 |
| C    | 3.950832  | -0.231019 | -4.431281 |
| C    | 2.178644  | 1.234789  | -3.522989 |
| H    | 0.660889  | 2.423970  | -2.637569 |
| C    | 4.884430  | -1.226125 | -4.253814 |
| H    | 5.785039  | -2.600402 | -2.839806 |
| H    | 3.799230  | 0.217817  | -5.409657 |
| H    | 2.021836  | 1.649943  | -4.515413 |
| H    | 5.485027  | -1.570626 | -5.090643 |
| P    | 0.132086  | -1.558173 | 0.281551  |
| P    | 0.347506  | 1.700334  | 0.074193  |
| C    | -0.606563 | -2.788386 | 1.463819  |
| C    | -1.392631 | -2.286897 | 2.514946  |
| C    | -0.427089 | -4.176697 | 1.366104  |
| C    | -1.967986 | -3.144825 | 3.452487  |
| H    | -1.563263 | -1.217819 | 2.597303  |
| C    | -1.011960 | -5.036436 | 2.298772  |
| H    | 0.159496  | -4.598107 | 0.557665  |
| C    | -1.779578 | -4.524363 | 3.346056  |
| H    | -2.568227 | -2.736038 | 4.260666  |
| H    | -0.863872 | -6.108662 | 2.204755  |

|   |           |           |           |
|---|-----------|-----------|-----------|
| H | -2.230487 | -5.195078 | 4.071872  |
| C | 0.574787  | -2.535361 | -1.225932 |
| C | -0.101169 | -2.306596 | -2.433864 |
| C | 1.584008  | -3.514010 | -1.188264 |
| C | 0.202116  | -3.059093 | -3.570623 |
| H | -0.850636 | -1.521842 | -2.482055 |
| C | 1.879808  | -4.268781 | -2.323095 |
| H | 2.152418  | -3.677878 | -0.277406 |
| C | 1.186393  | -4.046226 | -3.515353 |
| H | -0.327591 | -2.867122 | -4.499563 |
| H | 2.660336  | -5.023041 | -2.278830 |
| H | 1.422391  | -4.631898 | -4.399249 |
| C | 0.243164  | 3.548489  | -0.078379 |
| C | -0.735703 | 4.193092  | 0.698913  |
| C | 1.188720  | 4.331147  | -0.753813 |
| C | -0.783987 | 5.582958  | 0.774702  |
| H | -1.464583 | 3.601011  | 1.246344  |
| C | 1.135043  | 5.727006  | -0.680546 |
| H | 1.978929  | 3.866657  | -1.332889 |
| C | 0.149917  | 6.356005  | 0.078273  |
| H | -1.548714 | 6.063333  | 1.378668  |
| H | 1.873399  | 6.318013  | -1.215148 |
| H | 0.113260  | 7.440015  | 0.136150  |
| C | 0.960862  | 1.730748  | 1.819714  |
| C | 2.181219  | 2.331147  | 2.163509  |
| C | 0.086269  | 1.336391  | 2.840748  |
| C | 2.530573  | 2.498023  | 3.502279  |
| H | 2.859813  | 2.675067  | 1.389142  |
| C | 0.431287  | 1.515632  | 4.182472  |
| H | -0.878462 | 0.906507  | 2.582702  |
| C | 1.656972  | 2.091663  | 4.515056  |
| H | 3.484309  | 2.952483  | 3.754552  |
| H | -0.259540 | 1.209666  | 4.963409  |
| H | 1.928568  | 2.233209  | 5.557281  |
| C | -6.676874 | -0.716805 | 0.622212  |
| C | -6.305515 | 0.660785  | 0.032685  |
| H | -7.616320 | -1.096718 | 0.211469  |
| H | -6.793777 | -0.660176 | 1.711914  |
| H | -6.793193 | 0.810219  | -0.937101 |
| H | -6.571262 | 1.495440  | 0.684676  |
| C | -5.480139 | -1.559032 | 0.262238  |
| C | -4.406781 | -0.700590 | -0.070974 |
| C | -5.297816 | -2.919866 | 0.197320  |
| H | -6.103844 | -3.610942 | 0.426814  |
| C | -4.033508 | -3.385706 | -0.212324 |
| H | -3.832536 | -4.444718 | -0.326300 |

|    |           |           |           |
|----|-----------|-----------|-----------|
| C  | -3.020144 | -2.479613 | -0.444914 |
| H  | -2.047806 | -2.827824 | -0.753075 |
| N  | -3.151539 | -1.123583 | -0.316085 |
| N  | -4.833500 | 0.606918  | -0.156484 |
| C  | -4.138260 | 1.620233  | -0.798515 |
| C  | -2.787952 | 1.694940  | -1.027442 |
| C  | -4.887188 | 2.849181  | -1.286127 |
| H  | -5.873596 | 2.625697  | -1.705324 |
| H  | -5.046335 | 3.557443  | -0.458497 |
| C  | -3.913681 | 3.416480  | -2.332668 |
| H  | -4.111139 | 2.942051  | -3.301473 |
| H  | -4.011807 | 4.498385  | -2.463127 |
| C  | -2.528753 | 2.994877  | -1.806707 |
| H  | -1.799556 | 2.866890  | -2.614516 |
| H  | -2.130366 | 3.770625  | -1.149236 |
| Ir | -1.435740 | 0.259586  | -0.233504 |
| H  | -1.931726 | 0.724245  | -1.712766 |

## 10

B3LYP SCF energy: -3058.11821345 a.u.

B3LYP enthalpy: -3057.200333 a.u.

B3LYP free energy: -3057.338949 a.u.

B3LYP-D3(BJ) SCF energy in solution: -3059.22881556 a.u.

B3LYP-D3(BJ) enthalpy in solution: -3058.310935 a.u.

B3LYP-D3(BJ) free energy in solution: -3058.449551 a.u.

### Cartesian coordinates

| ATOM | X        | Y         | Z         |
|------|----------|-----------|-----------|
| C    | 6.021895 | 1.194905  | 1.621337  |
| C    | 4.913564 | 0.896480  | 0.860161  |
| C    | 3.932826 | -0.031926 | 1.317134  |
| C    | 4.131122 | -0.632406 | 2.602389  |
| C    | 5.291032 | -0.313837 | 3.359000  |
| C    | 6.220312 | 0.580363  | 2.881393  |
| H    | 6.753182 | 1.907443  | 1.250427  |
| H    | 4.784106 | 1.377978  | -0.102147 |
| C    | 2.755789 | -0.354067 | 0.552937  |
| C    | 3.149864 | -1.525010 | 3.095072  |
| H    | 5.425397 | -0.787098 | 4.328309  |
| H    | 7.103067 | 0.820015  | 3.467013  |
| C    | 2.016266 | -1.797780 | 2.370084  |
| C    | 1.795422 | -1.217968 | 1.088428  |
| H    | 3.298768 | -1.991121 | 4.065807  |
| H    | 1.282938 | -2.476491 | 2.785393  |

|   |           |           |           |
|---|-----------|-----------|-----------|
| C | 2.616815  | 0.248665  | -0.814146 |
| C | 3.496977  | -0.209553 | -1.863626 |
| C | 1.678707  | 1.240062  | -1.094296 |
| C | 4.474286  | -1.223692 | -1.656593 |
| C | 3.395560  | 0.360135  | -3.174509 |
| C | 1.566305  | 1.760623  | -2.420002 |
| C | 5.310641  | -1.626942 | -2.674619 |
| H | 4.564384  | -1.683371 | -0.680040 |
| C | 4.272241  | -0.074899 | -4.203175 |
| C | 2.405416  | 1.345055  | -3.420804 |
| H | 0.804035  | 2.499843  | -2.642288 |
| C | 5.216480  | -1.045775 | -3.960438 |
| H | 6.051246  | -2.399268 | -2.487237 |
| H | 4.181464  | 0.375253  | -5.188374 |
| H | 2.314211  | 1.765166  | -4.419240 |
| H | 5.885865  | -1.369982 | -4.751901 |
| P | 0.196872  | -1.611480 | 0.196308  |
| P | 0.293332  | 1.724007  | 0.025094  |
| C | -0.596455 | -2.851562 | 1.328011  |
| C | -1.390126 | -2.366968 | 2.381961  |
| C | -0.454065 | -4.239467 | 1.181594  |
| C | -2.013724 | -3.241921 | 3.270918  |
| H | -1.519337 | -1.296851 | 2.513662  |
| C | -1.086610 | -5.116248 | 2.066584  |
| H | 0.144934  | -4.645931 | 0.374333  |
| C | -1.865283 | -4.621926 | 3.113562  |
| H | -2.617598 | -2.846529 | 4.083060  |
| H | -0.965882 | -6.188014 | 1.935618  |
| H | -2.353394 | -5.305762 | 3.802110  |
| C | 0.776814  | -2.615025 | -1.244885 |
| C | 0.133585  | -2.519710 | -2.488914 |
| C | 1.850462  | -3.512868 | -1.108546 |
| C | 0.541777  | -3.312498 | -3.564232 |
| H | -0.681263 | -1.815929 | -2.627116 |
| C | 2.253465  | -4.306770 | -2.181890 |
| H | 2.378143  | -3.587525 | -0.162257 |
| C | 1.598205  | -4.210472 | -3.411831 |
| H | 0.034595  | -3.222076 | -4.520657 |
| H | 3.084191  | -4.995840 | -2.058815 |
| H | 1.915737  | -4.826714 | -4.248045 |
| C | 0.086451  | 3.555273  | -0.168575 |
| C | -1.043280 | 4.144715  | 0.424347  |
| C | 1.082119  | 4.386462  | -0.700873 |
| C | -1.185052 | 5.530264  | 0.458810  |
| H | -1.820158 | 3.515071  | 0.849036  |
| C | 0.934460  | 5.776166  | -0.668824 |

|    |           |           |           |
|----|-----------|-----------|-----------|
| H  | 1.979069  | 3.963171  | -1.139686 |
| C  | -0.197451 | 6.351101  | -0.092934 |
| H  | -2.067197 | 5.969662  | 0.915874  |
| H  | 1.711998  | 6.405783  | -1.092108 |
| H  | -0.308748 | 7.431244  | -0.067914 |
| C  | 0.768361  | 1.783032  | 1.809238  |
| C  | 1.938565  | 2.425176  | 2.240330  |
| C  | -0.165769 | 1.360893  | 2.763973  |
| C  | 2.181250  | 2.605155  | 3.600823  |
| H  | 2.662563  | 2.787975  | 1.517644  |
| C  | 0.070393  | 1.554115  | 4.126901  |
| H  | -1.092579 | 0.891994  | 2.439937  |
| C  | 1.248437  | 2.171466  | 4.546991  |
| H  | 3.098237  | 3.090589  | 3.921843  |
| H  | -0.665802 | 1.226168  | 4.855590  |
| H  | 1.436674  | 2.322973  | 5.605997  |
| C  | -6.509362 | -0.739129 | 0.937668  |
| C  | -6.153290 | 0.681326  | 0.428964  |
| H  | -7.491620 | -1.065509 | 0.584077  |
| H  | -6.532750 | -0.768448 | 2.034014  |
| H  | -6.781733 | 0.964824  | -0.421421 |
| H  | -6.260790 | 1.448312  | 1.200586  |
| C  | -5.377426 | -1.584537 | 0.407774  |
| C  | -4.340710 | -0.720951 | -0.024764 |
| C  | -5.223762 | -2.939621 | 0.257702  |
| H  | -6.008890 | -3.633791 | 0.543847  |
| C  | -4.017390 | -3.405184 | -0.314424 |
| H  | -3.850633 | -4.462065 | -0.487510 |
| C  | -3.023203 | -2.506261 | -0.624566 |
| H  | -2.086955 | -2.845890 | -1.041188 |
| N  | -3.128061 | -1.151026 | -0.439392 |
| N  | -4.741050 | 0.586428  | -0.005432 |
| C  | -4.104758 | 1.568552  | -0.782405 |
| C  | -2.783540 | 1.574470  | -1.100520 |
| C  | -4.904981 | 2.690446  | -1.420902 |
| H  | -5.882551 | 2.367790  | -1.797511 |
| H  | -5.098323 | 3.502313  | -0.703911 |
| C  | -3.970317 | 3.137145  | -2.566529 |
| H  | -4.275781 | 2.635601  | -3.491432 |
| H  | -4.016601 | 4.214883  | -2.749679 |
| C  | -2.554209 | 2.658923  | -2.153612 |
| H  | -2.001603 | 2.263151  | -3.014062 |
| H  | -1.958692 | 3.488432  | -1.762095 |
| Ir | -1.415188 | 0.217746  | -0.401883 |
| H  | -0.846322 | 0.180475  | -1.835691 |

**10a-TS**

B3LYP SCF energy: -3058.11181512 a.u.  
B3LYP enthalpy: -3057.194103 a.u.  
B3LYP free energy: -3057.330129 a.u.  
B3LYP-D3(BJ) SCF energy in solution: -3059.21312918 a.u.  
B3LYP-D3(BJ) enthalpy in solution: -3058.295417 a.u.  
B3LYP-D3(BJ) free energy in solution: -3058.431443 a.u.  
Imaginary frequency: -26.6016 cm<sup>-1</sup>

## Cartesian coordinates

| ATOM | X        | Y         | Z         |
|------|----------|-----------|-----------|
| C    | 5.708348 | 1.782012  | 2.091591  |
| C    | 4.649432 | 1.486145  | 1.261721  |
| C    | 3.955135 | 0.244215  | 1.361598  |
| C    | 4.400525 | -0.683049 | 2.356471  |
| C    | 5.504636 | -0.356848 | 3.189095  |
| C    | 6.148317 | 0.851709  | 3.063377  |
| H    | 6.214857 | 2.738206  | 1.995618  |
| H    | 4.337584 | 2.214837  | 0.523029  |
| C    | 2.826736 | -0.084775 | 0.521684  |
| C    | 3.723042 | -1.918186 | 2.476453  |
| H    | 5.827080 | -1.082334 | 3.931557  |
| H    | 6.990270 | 1.095483  | 3.704682  |
| C    | 2.625175 | -2.196921 | 1.702687  |
| C    | 2.128753 | -1.278087 | 0.730007  |
| H    | 4.077661 | -2.650639 | 3.197273  |
| H    | 2.140170 | -3.153170 | 1.833538  |
| C    | 2.540719 | 0.879450  | -0.591871 |
| C    | 3.489896 | 0.925120  | -1.679736 |
| C    | 1.476771 | 1.780320  | -0.573802 |
| C    | 4.576178 | 0.009847  | -1.788287 |
| C    | 3.352194 | 1.916664  | -2.704736 |
| C    | 1.364422 | 2.760013  | -1.606121 |
| C    | 5.465055 | 0.078587  | -2.838242 |
| H    | 4.705923 | -0.755371 | -1.032877 |
| C    | 4.288300 | 1.967258  | -3.771410 |
| C    | 2.278076 | 2.836716  | -2.624728 |
| H    | 0.544585 | 3.466554  | -1.586267 |
| C    | 5.326836 | 1.068091  | -3.839726 |
| H    | 6.283060 | -0.633757 | -2.896832 |
| H    | 4.166088 | 2.731444  | -4.534592 |
| H    | 2.178300 | 3.602798  | -3.389404 |
| H    | 6.038783 | 1.113045  | -4.658656 |
| P    | 0.547479 | -1.731029 | -0.188070 |



|   |           |           |           |
|---|-----------|-----------|-----------|
| P | -0.044222 | 1.532844  | 0.447988  |
| C | 0.109490  | -3.344374 | 0.622021  |
| C | -0.285957 | -3.346657 | 1.974275  |
| C | 0.091402  | -4.554940 | -0.085359 |
| C | -0.672212 | -4.529488 | 2.600611  |
| H | -0.279208 | -2.420581 | 2.542361  |
| C | -0.311591 | -5.738824 | 0.542435  |
| H | 0.389706  | -4.583091 | -1.127324 |
| C | -0.690081 | -5.731093 | 1.884218  |
| H | -0.961807 | -4.514394 | 3.647719  |
| H | -0.319945 | -6.666869 | -0.022172 |
| H | -0.994802 | -6.652751 | 2.371791  |
| C | 1.143827  | -2.262114 | -1.852385 |
| C | 0.293159  | -2.149440 | -2.963497 |
| C | 2.408844  | -2.847622 | -2.022980 |
| C | 0.700305  | -2.606410 | -4.218668 |
| H | -0.688483 | -1.697986 | -2.847992 |
| C | 2.814546  | -3.301125 | -3.278139 |
| H | 3.077920  | -2.954294 | -1.174738 |
| C | 1.962167  | -3.180772 | -4.378253 |
| H | 0.031792  | -2.509824 | -5.069487 |
| H | 3.797342  | -3.748560 | -3.396567 |
| H | 2.280954  | -3.533253 | -5.355060 |
| C | -0.761229 | 3.222190  | 0.699151  |
| C | -2.126939 | 3.370409  | 0.981272  |
| C | 0.078639  | 4.343404  | 0.814997  |
| C | -2.645762 | 4.616456  | 1.338340  |
| H | -2.786092 | 2.513353  | 0.918270  |
| C | -0.444321 | 5.587951  | 1.167410  |
| H | 1.143673  | 4.256242  | 0.626164  |
| C | -1.808606 | 5.729412  | 1.426248  |
| H | -3.706723 | 4.714767  | 1.550767  |
| H | 0.218253  | 6.445561  | 1.241201  |
| H | -2.214203 | 6.698729  | 1.701307  |
| C | 0.345494  | 1.155503  | 2.212132  |
| C | 1.400767  | 1.790820  | 2.881204  |
| C | -0.547690 | 0.357139  | 2.941158  |
| C | 1.576050  | 1.604374  | 4.252158  |
| H | 2.093358  | 2.425350  | 2.338095  |
| C | -0.376318 | 0.182083  | 4.316258  |
| H | -1.381548 | -0.119694 | 2.431884  |
| C | 0.688939  | 0.800908  | 4.972387  |
| H | 2.406866  | 2.089029  | 4.756606  |
| H | -1.078083 | -0.432796 | 4.873297  |
| H | 0.824124  | 0.664148  | 6.041469  |
| C | -6.699491 | -0.454667 | 0.664638  |

|    |           |           |           |
|----|-----------|-----------|-----------|
| C  | -6.235575 | 0.696494  | -0.257982 |
| H  | -7.615128 | -0.927385 | 0.297679  |
| H  | -6.907311 | -0.087744 | 1.677107  |
| H  | -6.728934 | 0.659666  | -1.235172 |
| H  | -6.415921 | 1.682719  | 0.176505  |
| C  | -5.516860 | -1.389642 | 0.664633  |
| C  | -4.405501 | -0.727779 | 0.074985  |
| C  | -5.380671 | -2.684205 | 1.089037  |
| H  | -6.214763 | -3.229011 | 1.522280  |
| C  | -4.119120 | -3.299696 | 0.913582  |
| H  | -3.951516 | -4.332011 | 1.198059  |
| C  | -3.078709 | -2.573216 | 0.386850  |
| H  | -2.113661 | -3.028122 | 0.253447  |
| N  | -3.161290 | -1.256799 | -0.000673 |
| N  | -4.779699 | 0.480044  | -0.437742 |
| C  | -4.010761 | 1.276865  | -1.277064 |
| C  | -2.656721 | 1.215527  | -1.429836 |
| C  | -4.693129 | 2.284618  | -2.186712 |
| H  | -5.203619 | 1.770157  | -3.015925 |
| H  | -5.454253 | 2.888249  | -1.678367 |
| C  | -3.507320 | 3.133460  | -2.686307 |
| H  | -3.648464 | 3.493883  | -3.709474 |
| H  | -3.392571 | 4.009693  | -2.038160 |
| C  | -2.278652 | 2.211689  | -2.527306 |
| H  | -2.067417 | 1.667726  | -3.459736 |
| H  | -1.369696 | 2.773313  | -2.294893 |
| Ir | -1.337319 | -0.045875 | -0.544089 |
| H  | -0.396320 | 0.387979  | -1.712257 |

### 10b

B3LYP SCF energy: -3058.11686277 a.u.

B3LYP enthalpy: -3057.197920 a.u.

B3LYP free energy: -3057.337080 a.u.

B3LYP-D3(BJ) SCF energy in solution: -3059.21500579 a.u.

B3LYP-D3(BJ) enthalpy in solution: -3058.296063 a.u.

B3LYP-D3(BJ) free energy in solution: -3058.435223 a.u.

### Cartesian coordinates

| ATOM | X         | Y         | Z        |
|------|-----------|-----------|----------|
| C    | -5.917215 | -1.472093 | 1.887736 |
| C    | -4.761789 | -1.308947 | 1.155318 |
| C    | -4.082608 | -0.055195 | 1.108913 |
| C    | -4.653733 | 1.028449  | 1.849522 |
| C    | -5.854993 | 0.835743  | 2.583258 |

|   |           |           |           |
|---|-----------|-----------|-----------|
| C | -6.477571 | -0.389968 | 2.606744  |
| H | -6.406633 | -2.441667 | 1.908319  |
| H | -4.360682 | -2.155080 | 0.610275  |
| C | -2.852922 | 0.137307  | 0.368550  |
| C | -4.004525 | 2.284588  | 1.817417  |
| H | -6.269298 | 1.678717  | 3.130340  |
| H | -7.394052 | -0.530808 | 3.172189  |
| C | -2.814062 | 2.439161  | 1.155605  |
| C | -2.188348 | 1.365709  | 0.451053  |
| H | -4.455103 | 3.129713  | 2.331741  |
| H | -2.347223 | 3.414574  | 1.162349  |
| C | -2.471702 | -1.007815 | -0.533435 |
| C | -3.318980 | -1.220297 | -1.682426 |
| C | -1.443406 | -1.918132 | -0.274308 |
| C | -4.327210 | -0.290662 | -2.072844 |
| C | -3.151796 | -2.395150 | -2.487822 |
| C | -1.300951 | -3.081808 | -1.085155 |
| C | -5.115656 | -0.515622 | -3.178713 |
| H | -4.467790 | 0.615208  | -1.496204 |
| C | -3.991821 | -2.606447 | -3.613848 |
| C | -2.143897 | -3.326345 | -2.138710 |
| H | -0.505595 | -3.785657 | -0.871944 |
| C | -4.956224 | -1.687893 | -3.955420 |
| H | -5.869568 | 0.214727  | -3.458114 |
| H | -3.851444 | -3.508417 | -4.203910 |
| H | -2.029132 | -4.229984 | -2.731947 |
| H | -5.591915 | -1.855104 | -4.819984 |
| P | -0.515154 | 1.707490  | -0.324009 |
| P | 0.037648  | -1.471531 | 0.730324  |
| C | 0.009487  | 3.293595  | 0.487795  |
| C | -0.002759 | 3.431774  | 1.889610  |
| C | 0.541634  | 4.339037  | -0.281712 |
| C | 0.481617  | 4.590840  | 2.496391  |
| H | -0.404450 | 2.637337  | 2.513081  |
| C | 1.039825  | 5.493124  | 0.329987  |
| H | 0.559927  | 4.264344  | -1.363979 |
| C | 1.007300  | 5.625880  | 1.717794  |
| H | 0.443822  | 4.685934  | 3.578302  |
| H | 1.442149  | 6.292810  | -0.285539 |
| H | 1.382834  | 6.528983  | 2.190353  |
| C | -0.956513 | 2.271546  | -2.032790 |
| C | -0.084111 | 2.025106  | -3.103534 |
| C | -2.135242 | 2.996596  | -2.273556 |
| C | -0.380821 | 2.493061  | -4.385667 |
| H | 0.827130  | 1.456227  | -2.938615 |
| C | -2.431861 | 3.460260  | -3.555054 |

|   |           |           |           |
|---|-----------|-----------|-----------|
| H | -2.826910 | 3.199582  | -1.461957 |
| C | -1.555794 | 3.209794  | -4.614003 |
| H | 0.304800  | 2.291783  | -5.204053 |
| H | -3.348781 | 4.017303  | -3.726197 |
| H | -1.789667 | 3.570659  | -5.611577 |
| C | 0.883847  | -3.062993 | 1.148256  |
| C | 2.274771  | -3.199662 | 1.066751  |
| C | 0.125753  | -4.121181 | 1.681336  |
| C | 2.896199  | -4.375768 | 1.495894  |
| H | 2.868590  | -2.389362 | 0.660435  |
| C | 0.747482  | -5.296388 | 2.098374  |
| H | -0.953046 | -4.034228 | 1.767640  |
| C | 2.135992  | -5.426541 | 2.007443  |
| H | 3.976601  | -4.468047 | 1.427168  |
| H | 0.147363  | -6.108822 | 2.497933  |
| H | 2.619625  | -6.341624 | 2.336871  |
| C | -0.465631 | -0.959706 | 2.427937  |
| C | -1.663693 | -1.400309 | 3.007356  |
| C | 0.449726  | -0.242950 | 3.212565  |
| C | -1.950821 | -1.104984 | 4.340670  |
| H | -2.379939 | -1.968162 | 2.424327  |
| C | 0.162562  | 0.046276  | 4.547374  |
| H | 1.393967  | 0.075139  | 2.784269  |
| C | -1.041474 | -0.379629 | 5.112513  |
| H | -2.888431 | -1.442346 | 4.772873  |
| H | 0.882736  | 0.596921  | 5.146350  |
| H | -1.266472 | -0.153848 | 6.150922  |
| C | 6.685895  | 0.489322  | 0.287360  |
| C | 6.166712  | -0.266223 | -0.954591 |
| H | 7.449873  | 1.226596  | 0.024782  |
| H | 7.135463  | -0.202079 | 1.011011  |
| H | 6.385588  | 0.279976  | -1.879944 |
| H | 6.581212  | -1.271590 | -1.044919 |
| C | 5.434284  | 1.112681  | 0.849717  |
| C | 4.301790  | 0.547756  | 0.207765  |
| C | 5.253761  | 2.049173  | 1.835642  |
| H | 6.097823  | 2.501375  | 2.348537  |
| C | 3.927042  | 2.403964  | 2.159586  |
| H | 3.711689  | 3.146133  | 2.920002  |
| C | 2.883236  | 1.801088  | 1.494028  |
| H | 1.866028  | 2.066129  | 1.728209  |
| N | 3.024513  | 0.862395  | 0.507622  |
| N | 4.695470  | -0.336200 | -0.769826 |
| C | 3.886993  | -1.073477 | -1.609338 |
| C | 2.514173  | -1.182024 | -1.563814 |
| C | 4.528553  | -1.953067 | -2.669220 |

|    |          |           |           |
|----|----------|-----------|-----------|
| H  | 5.305996 | -1.446518 | -3.252388 |
| H  | 5.007942 | -2.822400 | -2.191050 |
| C  | 3.323004 | -2.381912 | -3.525391 |
| H  | 3.196890 | -1.674544 | -4.353361 |
| H  | 3.446316 | -3.379380 | -3.957278 |
| C  | 2.120707 | -2.270380 | -2.564799 |
| H  | 1.185130 | -2.056823 | -3.086781 |
| H  | 1.969101 | -3.217393 | -2.022220 |
| Ir | 1.226493 | -0.024722 | -0.540976 |
| H  | 0.194992 | -0.515004 | -1.621131 |

### 10c

B3LYP SCF energy: -3293.96722501 a.u.

B3LYP enthalpy: -3292.869596 a.u.

B3LYP free energy: -3293.024702 a.u.

B3LYP-D3(BJ) SCF energy in solution: -3295.18734312 a.u.

B3LYP-D3(BJ) enthalpy in solution: -3294.089714 a.u.

B3LYP-D3(BJ) free energy in solution: -3294.244820 a.u.

### Cartesian coordinates

| ATOM | X         | Y         | Z         |
|------|-----------|-----------|-----------|
| C    | -5.906158 | -2.580323 | -0.110230 |
| C    | -4.826195 | -1.774537 | -0.393440 |
| C    | -4.139370 | -1.072656 | 0.638666  |
| C    | -4.610532 | -1.232686 | 1.981421  |
| C    | -5.729804 | -2.068260 | 2.242872  |
| C    | -6.367502 | -2.730031 | 1.219860  |
| H    | -6.411120 | -3.106229 | -0.915603 |
| H    | -4.487425 | -1.675177 | -1.418115 |
| C    | -3.002211 | -0.231430 | 0.371250  |
| C    | -3.957229 | -0.522283 | 3.015143  |
| H    | -6.073398 | -2.171568 | 3.268983  |
| H    | -7.223844 | -3.365219 | 1.427051  |
| C    | -2.855122 | 0.254025  | 2.750145  |
| C    | -2.328835 | 0.385365  | 1.434621  |
| H    | -4.342437 | -0.589249 | 4.029676  |
| H    | -2.407838 | 0.804124  | 3.565826  |
| C    | -2.665353 | 0.048658  | -1.067560 |
| C    | -3.570770 | 0.906533  | -1.801961 |
| C    | -1.538538 | -0.459474 | -1.708746 |
| C    | -4.742881 | 1.467407  | -1.220201 |
| C    | -3.296360 | 1.220888  | -3.172348 |
| C    | -1.242175 | -0.059116 | -3.046984 |
| C    | -5.603700 | 2.249468  | -1.959775 |

|   |           |           |           |
|---|-----------|-----------|-----------|
| H | -4.967064 | 1.274774  | -0.178612 |
| C | -4.202099 | 2.027337  | -3.909660 |
| C | -2.100106 | 0.736088  | -3.759814 |
| H | -0.319521 | -0.386624 | -3.511326 |
| C | -5.340636 | 2.527432  | -3.320431 |
| H | -6.494685 | 2.656998  | -1.490583 |
| H | -3.976474 | 2.243262  | -4.950919 |
| H | -1.866701 | 1.008341  | -4.786196 |
| H | -6.031773 | 3.139418  | -3.892734 |
| P | -0.743795 | 1.348201  | 1.148164  |
| P | -0.235298 | -1.444278 | -0.841221 |
| C | -0.299045 | 2.145233  | 2.775518  |
| C | -0.150229 | 1.411539  | 3.968692  |
| C | 0.061460  | 3.505360  | 2.801398  |
| C | 0.315905  | 2.013943  | 5.138300  |
| H | -0.426005 | 0.363628  | 4.007431  |
| C | 0.541553  | 4.104615  | 3.968108  |
| H | -0.045791 | 4.115231  | 1.911870  |
| C | 0.668345  | 3.364099  | 5.142677  |
| H | 0.399073  | 1.424280  | 6.047021  |
| H | 0.807100  | 5.157924  | 3.954980  |
| H | 1.032929  | 3.832994  | 6.051833  |
| C | -1.422005 | 2.817943  | 0.229431  |
| C | -0.911512 | 3.271122  | -0.993476 |
| C | -2.503317 | 3.511840  | 0.804283  |
| C | -1.457091 | 4.395316  | -1.620989 |
| H | -0.098476 | 2.740093  | -1.473145 |
| C | -3.043009 | 4.634175  | 0.180668  |
| H | -2.924514 | 3.176946  | 1.747713  |
| C | -2.518382 | 5.082092  | -1.034950 |
| H | -1.049439 | 4.727598  | -2.571666 |
| H | -3.875273 | 5.157748  | 0.642589  |
| H | -2.939734 | 5.956719  | -1.522176 |
| C | 0.394471  | -2.688650 | -2.063408 |
| C | 1.510459  | -3.448498 | -1.674365 |
| C | -0.263083 | -3.024168 | -3.257038 |
| C | 1.975304  | -4.491035 | -2.475525 |
| H | 2.011362  | -3.239454 | -0.735870 |
| C | 0.207691  | -4.067118 | -4.059434 |
| H | -1.151653 | -2.487440 | -3.568611 |
| C | 1.331213  | -4.798121 | -3.676339 |
| H | 2.837321  | -5.070178 | -2.155985 |
| H | -0.313944 | -4.308616 | -4.981234 |
| H | 1.695202  | -5.609120 | -4.300527 |
| C | -1.079476 | -2.641709 | 0.295397  |
| C | -1.905558 | -3.637474 | -0.254886 |

|    |           |           |           |
|----|-----------|-----------|-----------|
| C  | -0.853526 | -2.644448 | 1.675288  |
| C  | -2.493443 | -4.600869 | 0.562008  |
| H  | -2.085331 | -3.672384 | -1.324115 |
| C  | -1.434678 | -3.615705 | 2.492663  |
| H  | -0.223374 | -1.886874 | 2.115719  |
| C  | -2.256673 | -4.596165 | 1.938604  |
| H  | -3.133918 | -5.358902 | 0.120665  |
| H  | -1.240450 | -3.603887 | 3.561609  |
| H  | -2.708247 | -5.354085 | 2.572297  |
| C  | 5.322570  | -3.269233 | 1.682161  |
| C  | 5.438318  | -2.550684 | 0.321321  |
| H  | 6.244831  | -3.196286 | 2.265347  |
| H  | 5.105591  | -4.336809 | 1.546195  |
| H  | 6.234046  | -1.793520 | 0.334185  |
| H  | 5.638385  | -3.237307 | -0.502893 |
| C  | 4.153312  | -2.569467 | 2.325758  |
| C  | 3.465380  | -1.817787 | 1.331433  |
| C  | 3.695365  | -2.570913 | 3.617925  |
| H  | 4.206007  | -3.130405 | 4.396844  |
| C  | 2.544184  | -1.806192 | 3.905360  |
| H  | 2.147915  | -1.737807 | 4.912318  |
| C  | 1.924274  | -1.129822 | 2.877360  |
| H  | 1.058994  | -0.518836 | 3.073943  |
| N  | 2.333218  | -1.129485 | 1.577481  |
| N  | 4.127776  | -1.885899 | 0.133230  |
| C  | 3.816586  | -1.211330 | -1.062081 |
| C  | 2.749795  | -0.416462 | -1.300625 |
| C  | 4.652141  | -1.503276 | -2.298613 |
| H  | 5.733175  | -1.429616 | -2.130997 |
| H  | 4.454666  | -2.523963 | -2.663346 |
| C  | 4.143307  | -0.443617 | -3.294599 |
| H  | 4.780496  | 0.446961  | -3.235448 |
| H  | 4.163112  | -0.793423 | -4.331306 |
| C  | 2.723897  | -0.100318 | -2.793787 |
| H  | 2.440602  | 0.932383  | -3.017949 |
| H  | 1.977386  | -0.739493 | -3.290649 |
| Ir | 1.266190  | 0.195552  | -0.005384 |
| H  | 0.700588  | 1.007369  | -1.230483 |
| C  | 2.320745  | 2.410673  | 0.067180  |
| H  | 1.471600  | 3.049941  | 0.292430  |
| C  | 2.792917  | 1.591344  | 1.068421  |
| H  | 2.388283  | 1.647649  | 2.073500  |
| H  | 3.764804  | 1.118306  | 0.964035  |
| C  | 3.121134  | 2.837870  | -1.134329 |
| H  | 3.877671  | 2.083496  | -1.370207 |
| H  | 2.470029  | 2.939050  | -2.010767 |

|   |          |          |           |
|---|----------|----------|-----------|
| C | 3.806082 | 4.196507 | -0.866499 |
| H | 3.047022 | 4.946927 | -0.602280 |
| H | 4.465757 | 4.102981 | 0.007249  |
| C | 4.615500 | 4.695105 | -2.072052 |
| H | 3.950610 | 4.782040 | -2.942915 |
| H | 5.370153 | 3.941236 | -2.336626 |
| C | 5.302383 | 6.040195 | -1.814648 |
| H | 4.569871 | 6.821859 | -1.579721 |
| H | 6.000755 | 5.974872 | -0.971656 |
| H | 5.869765 | 6.368772 | -2.692059 |

### 11-TS

B3LYP SCF energy: -3293.94512989 a.u.  
 B3LYP enthalpy: -3292.849681 a.u.  
 B3LYP free energy: -3293.004666 a.u.  
 B3LYP-D3(BJ) SCF energy in solution: -3295.16160909 a.u.  
 B3LYP-D3(BJ) enthalpy in solution: -3294.066160 a.u.  
 B3LYP-D3(BJ) free energy in solution: -3294.221145 a.u.  
 Imaginary frequency: -314.7382 cm<sup>-1</sup>

### Cartesian coordinates

| ATOM | X        | Y         | Z         |
|------|----------|-----------|-----------|
| C    | 6.272485 | 2.000654  | 0.854428  |
| C    | 5.132102 | 1.464908  | 0.297976  |
| C    | 4.366376 | 0.480269  | 0.987113  |
| C    | 4.829110 | 0.060676  | 2.274694  |
| C    | 6.012932 | 0.625061  | 2.820811  |
| C    | 6.722684 | 1.577877  | 2.128040  |
| H    | 6.835013 | 2.752986  | 0.308683  |
| H    | 4.808172 | 1.802109  | -0.679660 |
| C    | 3.157606 | -0.081529 | 0.436429  |
| C    | 4.097313 | -0.936543 | 2.960595  |
| H    | 6.346737 | 0.287895  | 3.798880  |
| H    | 7.627097 | 2.004834  | 2.551766  |
| C    | 2.930799 | -1.437258 | 2.438912  |
| C    | 2.408033 | -0.990740 | 1.190258  |
| H    | 4.470305 | -1.308727 | 3.911626  |
| H    | 2.418083 | -2.212337 | 2.990166  |
| C    | 2.855184 | 0.259473  | -0.995652 |
| C    | 3.696842 | -0.353523 | -1.998745 |
| C    | 1.858490 | 1.150644  | -1.385854 |
| C    | 4.706626 | -1.305017 | -1.677180 |
| C    | 3.518162 | -0.016691 | -3.379473 |
| C    | 1.678931 | 1.439470  | -2.771989 |



|   |           |           |           |
|---|-----------|-----------|-----------|
| C | 5.496014  | -1.866633 | -2.656778 |
| H | 4.852567  | -1.599455 | -0.645255 |
| C | 4.353961  | -0.604012 | -4.365755 |
| C | 2.491044  | 0.893937  | -3.731744 |
| H | 0.880610  | 2.103354  | -3.079384 |
| C | 5.327993  | -1.509843 | -4.014910 |
| H | 6.256820  | -2.591765 | -2.382195 |
| H | 4.205062  | -0.325304 | -5.405990 |
| H | 2.344623  | 1.147019  | -4.779013 |
| H | 5.963377  | -1.955041 | -4.775109 |
| P | 0.767053  | -1.671718 | 0.574656  |
| P | 0.494138  | 1.679946  | -0.250306 |
| C | 0.158258  | -2.764585 | 1.954692  |
| C | 0.093961  | -2.321808 | 3.290257  |
| C | -0.382335 | -4.026863 | 1.654653  |
| C | -0.458737 | -3.124576 | 4.290201  |
| H | 0.490404  | -1.348031 | 3.562721  |
| C | -0.949877 | -4.822273 | 2.653103  |
| H | -0.347535 | -4.405485 | 0.638984  |
| C | -0.984639 | -4.378793 | 3.975210  |
| H | -0.472310 | -2.768103 | 5.316760  |
| H | -1.353665 | -5.796914 | 2.393557  |
| H | -1.412599 | -5.004649 | 4.752932  |
| C | 1.383937  | -2.943987 | -0.636975 |
| C | 0.992202  | -2.976642 | -1.981418 |
| C | 2.308705  | -3.903732 | -0.184656 |
| C | 1.500451  | -3.947741 | -2.849628 |
| H | 0.301240  | -2.233656 | -2.361421 |
| C | 2.811225  | -4.873770 | -1.048933 |
| H | 2.638445  | -3.896686 | 0.849887  |
| C | 2.406201  | -4.899829 | -2.386370 |
| H | 1.186470  | -3.952474 | -3.889706 |
| H | 3.521413  | -5.607842 | -0.678566 |
| H | 2.799430  | -5.654990 | -3.061054 |
| C | -0.033944 | 3.357244  | -0.846957 |
| C | -1.268359 | 3.842987  | -0.389155 |
| C | 0.786890  | 4.218913  | -1.593893 |
| C | -1.683526 | 5.141487  | -0.690223 |
| H | -1.900467 | 3.209697  | 0.222874  |
| C | 0.367523  | 5.514647  | -1.901370 |
| H | 1.761224  | 3.888861  | -1.937707 |
| C | -0.870982 | 5.978829  | -1.456414 |
| H | -2.638893 | 5.502636  | -0.318129 |
| H | 1.016522  | 6.163333  | -2.483076 |
| H | -1.194197 | 6.988260  | -1.694075 |
| C | 1.223667  | 2.221706  | 1.362628  |

|    |           |           |           |
|----|-----------|-----------|-----------|
| C  | 2.280730  | 3.144038  | 1.408247  |
| C  | 0.628495  | 1.815017  | 2.563254  |
| C  | 2.743478  | 3.629631  | 2.629714  |
| H  | 2.747977  | 3.485235  | 0.489919  |
| C  | 1.086979  | 2.308306  | 3.787511  |
| H  | -0.201220 | 1.118217  | 2.538361  |
| C  | 2.146888  | 3.214107  | 3.823156  |
| H  | 3.569987  | 4.334131  | 2.649534  |
| H  | 0.611343  | 1.987572  | 4.710645  |
| H  | 2.504898  | 3.599341  | 4.773738  |
| C  | -5.424242 | 2.538134  | 1.796983  |
| C  | -5.246302 | 2.477620  | 0.263823  |
| H  | -6.452096 | 2.312020  | 2.095651  |
| H  | -5.186853 | 3.536445  | 2.185226  |
| H  | -6.071052 | 1.934626  | -0.212631 |
| H  | -5.183859 | 3.467376  | -0.192775 |
| C  | -4.428296 | 1.523056  | 2.293918  |
| C  | -3.571665 | 1.140288  | 1.237652  |
| C  | -4.244073 | 0.976233  | 3.545612  |
| H  | -4.889503 | 1.244869  | 4.377370  |
| C  | -3.201881 | 0.048824  | 3.703018  |
| H  | -3.020926 | -0.444925 | 4.651342  |
| C  | -2.388809 | -0.235654 | 2.618333  |
| H  | -1.585747 | -0.949239 | 2.713207  |
| N  | -2.525441 | 0.311972  | 1.385061  |
| N  | -3.978606 | 1.734659  | 0.046286  |
| C  | -3.469845 | 1.530452  | -1.221143 |
| C  | -2.433740 | 0.700656  | -1.582728 |
| C  | -4.037287 | 2.329941  | -2.381840 |
| H  | -5.133056 | 2.363229  | -2.396551 |
| H  | -3.686673 | 3.371733  | -2.322659 |
| C  | -3.442699 | 1.610768  | -3.607605 |
| H  | -4.133182 | 0.828303  | -3.945834 |
| H  | -3.273704 | 2.285883  | -4.451584 |
| C  | -2.148733 | 0.976959  | -3.060810 |
| H  | -1.836260 | 0.085344  | -3.617350 |
| H  | -1.316606 | 1.689570  | -3.137640 |
| Ir | -0.985193 | -0.202878 | -0.329689 |
| H  | -0.200457 | -0.507640 | -1.651896 |
| C  | -3.168669 | -1.315395 | -1.469566 |
| H  | -2.976962 | -1.372668 | -2.538661 |
| C  | -2.225099 | -1.989639 | -0.628588 |
| H  | -1.598963 | -2.725876 | -1.130048 |
| H  | -2.604783 | -2.335851 | 0.333793  |
| C  | -4.630786 | -1.264152 | -1.102709 |
| H  | -4.752168 | -0.992477 | -0.047835 |

|   |           |           |           |
|---|-----------|-----------|-----------|
| H | -5.156690 | -0.516428 | -1.705938 |
| C | -5.280910 | -2.649497 | -1.337913 |
| H | -5.131680 | -2.951136 | -2.384217 |
| H | -4.772768 | -3.401843 | -0.721663 |
| C | -6.783138 | -2.651349 | -1.017961 |
| H | -7.287528 | -1.895445 | -1.636004 |
| H | -6.930088 | -2.343377 | 0.027085  |
| C | -7.435677 | -4.018719 | -1.246655 |
| H | -7.335753 | -4.336476 | -2.291229 |
| H | -6.973169 | -4.789274 | -0.618375 |
| H | -8.504285 | -3.991050 | -1.007923 |

## 12

B3LYP SCF energy: -3293.97636281 a.u.

B3LYP enthalpy: -3292.878352 a.u.

B3LYP free energy: -3293.033017 a.u.

B3LYP-D3(BJ) SCF energy in solution: -3295.19045696 a.u.

B3LYP-D3(BJ) enthalpy in solution: -3294.092446 a.u.

B3LYP-D3(BJ) free energy in solution: -3294.247111 a.u.

### Cartesian coordinates

| ATOM | X        | Y         | Z         |
|------|----------|-----------|-----------|
| C    | 6.554393 | 1.015157  | 0.848174  |
| C    | 5.318023 | 0.735080  | 0.309149  |
| C    | 4.385771 | -0.102216 | 0.989768  |
| C    | 4.782961 | -0.637799 | 2.255699  |
| C    | 6.068728 | -0.342181 | 2.782228  |
| C    | 6.941152 | 0.468721  | 2.094882  |
| H    | 7.241883 | 1.659939  | 0.308068  |
| H    | 5.049280 | 1.165838  | -0.647796 |
| C    | 3.076878 | -0.401454 | 0.454161  |
| C    | 3.873757 | -1.467978 | 2.951329  |
| H    | 6.346937 | -0.768101 | 3.742811  |
| H    | 7.922357 | 0.692008  | 2.503542  |
| C    | 2.620555 | -1.710735 | 2.451206  |
| C    | 2.179633 | -1.160849 | 1.209454  |
| H    | 4.176339 | -1.913073 | 3.895883  |
| H    | 1.963812 | -2.355072 | 3.017812  |
| C    | 2.826497 | 0.085229  | -0.945439 |
| C    | 3.542251 | -0.580751 | -2.006220 |
| C    | 2.031315 | 1.192770  | -1.239922 |
| C    | 4.302895 | -1.766056 | -1.790236 |
| C    | 3.489952 | -0.056038 | -3.339008 |
| C    | 1.997347 | 1.694414  | -2.574153 |

|   |           |           |           |
|---|-----------|-----------|-----------|
| C | 4.970427  | -2.382244 | -2.825303 |
| H | 4.343845  | -2.198763 | -0.797787 |
| C | 4.201868  | -0.705710 | -4.382692 |
| C | 2.720231  | 1.107748  | -3.582554 |
| H | 1.391587  | 2.563574  | -2.800431 |
| C | 4.930019  | -1.845775 | -4.134278 |
| H | 5.535376  | -3.290173 | -2.634586 |
| H | 4.155523  | -0.284884 | -5.383971 |
| H | 2.694161  | 1.524555  | -4.586451 |
| H | 5.469725  | -2.338083 | -4.938068 |
| P | 0.459863  | -1.616865 | 0.611957  |
| P | 0.687043  | 1.770279  | -0.106505 |
| C | -0.322832 | -2.433078 | 2.080824  |
| C | -0.323706 | -1.804877 | 3.340745  |
| C | -1.010005 | -3.649374 | 1.941814  |
| C | -0.969319 | -2.390248 | 4.430822  |
| H | 0.203532  | -0.865321 | 3.480331  |
| C | -1.671302 | -4.223906 | 3.030591  |
| H | -1.020372 | -4.164486 | 0.988053  |
| C | -1.649156 | -3.601067 | 4.278124  |
| H | -0.937424 | -1.899761 | 5.399941  |
| H | -2.193843 | -5.167338 | 2.900563  |
| H | -2.151481 | -4.056638 | 5.126578  |
| C | 0.889524  | -3.058964 | -0.481223 |
| C | 0.563466  | -3.112788 | -1.841860 |
| C | 1.625910  | -4.121536 | 0.075240  |
| C | 0.952895  | -4.201310 | -2.626912 |
| H | 0.008490  | -2.299585 | -2.293296 |
| C | 2.009616  | -5.209054 | -0.707120 |
| H | 1.903996  | -4.104517 | 1.124219  |
| C | 1.673294  | -5.252610 | -2.062694 |
| H | 0.691416  | -4.221591 | -3.681123 |
| H | 2.573796  | -6.021083 | -0.257121 |
| H | 1.973980  | -6.099682 | -2.672634 |
| C | 0.411235  | 3.558540  | -0.531349 |
| C | -0.828291 | 4.132045  | -0.210640 |
| C | 1.442216  | 4.399486  | -0.983382 |
| C | -1.039635 | 5.504870  | -0.355578 |
| H | -1.633647 | 3.502791  | 0.151736  |
| C | 1.226279  | 5.769196  | -1.138966 |
| H | 2.421061  | 3.991899  | -1.214306 |
| C | -0.015226 | 6.326627  | -0.826389 |
| H | -2.005609 | 5.931516  | -0.099052 |
| H | 2.033722  | 6.401703  | -1.497099 |
| H | -0.179465 | 7.393958  | -0.943058 |
| C | 1.390328  | 2.080198  | 1.579617  |

|    |           |           |           |
|----|-----------|-----------|-----------|
| C  | 2.665861  | 2.636797  | 1.755660  |
| C  | 0.562933  | 1.917523  | 2.698893  |
| C  | 3.112187  | 2.995555  | 3.026720  |
| H  | 3.319990  | 2.787629  | 0.903102  |
| C  | 1.006743  | 2.288350  | 3.971308  |
| H  | -0.437764 | 1.519489  | 2.575899  |
| C  | 2.284044  | 2.823207  | 4.138700  |
| H  | 4.108115  | 3.412262  | 3.147040  |
| H  | 0.349541  | 2.164752  | 4.828080  |
| H  | 2.631162  | 3.111211  | 5.126928  |
| C  | -5.302508 | 2.970260  | 0.348661  |
| C  | -4.648622 | 2.662870  | -1.029655 |
| H  | -6.379908 | 2.780071  | 0.333459  |
| H  | -5.165550 | 4.023577  | 0.622523  |
| H  | -5.306256 | 2.051647  | -1.661344 |
| H  | -4.393903 | 3.571259  | -1.581118 |
| C  | -4.553927 | 2.065433  | 1.301076  |
| C  | -3.460979 | 1.500083  | 0.610520  |
| C  | -4.723822 | 1.742799  | 2.628146  |
| H  | -5.549644 | 2.145430  | 3.208420  |
| C  | -3.794222 | 0.857370  | 3.214121  |
| H  | -3.890946 | 0.551680  | 4.249935  |
| C  | -2.746353 | 0.367253  | 2.454466  |
| H  | -2.033323 | -0.324066 | 2.880634  |
| N  | -2.542727 | 0.689079  | 1.149450  |
| N  | -3.425484 | 1.894134  | -0.696451 |
| C  | -2.604930 | 1.297432  | -1.697917 |
| C  | -2.662893 | -0.022929 | -2.155796 |
| C  | -2.101656 | 2.212082  | -2.815085 |
| H  | -2.978236 | 2.676594  | -3.293168 |
| H  | -1.468430 | 3.027536  | -2.463203 |
| C  | -1.403082 | 1.257946  | -3.799524 |
| H  | -1.479761 | 1.594084  | -4.837594 |
| H  | -0.342514 | 1.173268  | -3.552986 |
| C  | -2.094199 | -0.092779 | -3.560117 |
| H  | -2.966630 | -0.219501 | -4.223136 |
| H  | -1.448469 | -0.959900 | -3.729202 |
| Ir | -0.987682 | -0.046789 | -0.389629 |
| H  | -0.098344 | -0.449955 | -1.621636 |
| C  | -3.375237 | -1.251134 | -1.615656 |
| H  | -3.399175 | -1.974368 | -2.442165 |
| C  | -2.370774 | -1.712545 | -0.549231 |
| H  | -1.885786 | -2.644606 | -0.839569 |
| H  | -2.830876 | -1.844380 | 0.433611  |
| C  | -4.834159 | -1.067066 | -1.157525 |
| H  | -4.873870 | -0.479638 | -0.232763 |

|   |           |           |           |
|---|-----------|-----------|-----------|
| H | -5.385664 | -0.496793 | -1.920343 |
| C | -5.547271 | -2.407336 | -0.924115 |
| H | -5.541141 | -2.987885 | -1.858391 |
| H | -4.980720 | -2.999630 | -0.191659 |
| C | -6.992854 | -2.247600 | -0.434795 |
| H | -7.558884 | -1.651684 | -1.164924 |
| H | -6.996065 | -1.669021 | 0.500315  |
| C | -7.702953 | -3.586351 | -0.208512 |
| H | -7.749867 | -4.172398 | -1.134273 |
| H | -7.178469 | -4.191705 | 0.540904  |
| H | -8.729798 | -3.437754 | 0.142983  |

### 13-TS

B3LYP SCF energy: -3293.94769526 a.u.

B3LYP enthalpy: -3292.852589 a.u.

B3LYP free energy: -3293.008997 a.u.

B3LYP-D3(BJ) SCF energy in solution: -3295.16549903 a.u.

B3LYP-D3(BJ) enthalpy in solution: -3294.070393 a.u.

B3LYP-D3(BJ) free energy in solution: -3294.226801 a.u.

Imaginary frequency: -943.3217 cm<sup>-1</sup>

### Cartesian coordinates

| ATOM | X        | Y         | Z         |
|------|----------|-----------|-----------|
| C    | 6.605190 | 0.889713  | 0.969123  |
| C    | 5.410527 | 0.555483  | 0.372343  |
| C    | 4.418415 | -0.184253 | 1.078146  |
| C    | 4.695797 | -0.558107 | 2.433597  |
| C    | 5.940851 | -0.202912 | 3.019478  |
| C    | 6.878749 | 0.504077  | 2.304076  |
| H    | 7.347038 | 1.454012  | 0.411142  |
| H    | 5.217639 | 0.858167  | -0.650566 |
| C    | 3.163401 | -0.549677 | 0.482911  |
| C    | 3.715244 | -1.280331 | 3.155050  |
| H    | 6.136717 | -0.501062 | 4.046282  |
| H    | 7.828583 | 0.770049  | 2.758870  |
| C    | 2.505477 | -1.595049 | 2.583567  |
| C    | 2.202334 | -1.225054 | 1.243377  |
| H    | 3.929244 | -1.586097 | 4.176222  |
| H    | 1.777857 | -2.145124 | 3.167049  |
| C    | 2.919815 | -0.248713 | -0.966124 |
| C    | 3.638161 | -1.008235 | -1.960041 |
| C    | 1.981312 | 0.699881  | -1.365881 |
| C    | 4.624381 | -1.979456 | -1.625306 |
| C    | 3.355373 | -0.797644 | -3.348807 |

|   |           |           |           |
|---|-----------|-----------|-----------|
| C | 1.674599  | 0.846339  | -2.751114 |
| C | 5.306244  | -2.669914 | -2.603492 |
| H | 4.848333  | -2.174732 | -0.583789 |
| C | 4.073578  | -1.525668 | -4.333886 |
| C | 2.343656  | 0.127543  | -3.708436 |
| H | 0.904131  | 1.544353  | -3.056487 |
| C | 5.035758  | -2.440391 | -3.972652 |
| H | 6.060398  | -3.398662 | -2.319862 |
| H | 3.847269  | -1.344874 | -5.381696 |
| H | 2.103879  | 0.264815  | -4.760015 |
| H | 5.584375  | -2.989059 | -4.732751 |
| P | 0.498251  | -1.587291 | 0.572794  |
| P | 0.924083  | 1.650064  | -0.169917 |
| C | -0.268526 | -2.661770 | 1.878385  |
| C | -0.814966 | -2.034223 | 3.013569  |
| C | -0.367419 | -4.056274 | 1.772532  |
| C | -1.420139 | -2.780592 | 4.023094  |
| H | -0.776933 | -0.951601 | 3.098711  |
| C | -0.983275 | -4.803203 | 2.781689  |
| H | 0.025101  | -4.570252 | 0.902868  |
| C | -1.505590 | -4.171184 | 3.909236  |
| H | -1.831590 | -2.276753 | 4.893310  |
| H | -1.053224 | -5.882459 | 2.679571  |
| H | -1.981696 | -4.754650 | 4.692024  |
| C | 0.817907  | -2.735696 | -0.832042 |
| C | 0.097245  | -2.622344 | -2.028059 |
| C | 1.769543  | -3.762847 | -0.707345 |
| C | 0.303555  | -3.528807 | -3.070238 |
| H | -0.609458 | -1.809281 | -2.151159 |
| C | 1.972876  | -4.668367 | -1.747641 |
| H | 2.358058  | -3.852125 | 0.201322  |
| C | 1.236825  | -4.555906 | -2.929963 |
| H | -0.260547 | -3.426454 | -3.993181 |
| H | 2.711396  | -5.457229 | -1.637927 |
| H | 1.398384  | -5.260849 | -3.740412 |
| C | 0.591467  | 3.225804  | -1.099568 |
| C | -0.628935 | 3.898719  | -0.947119 |
| C | 1.581275  | 3.819817  | -1.906393 |
| C | -0.852425 | 5.129932  | -1.570108 |
| H | -1.410065 | 3.461122  | -0.341732 |
| C | 1.356018  | 5.046163  | -2.530742 |
| H | 2.528881  | 3.317405  | -2.070546 |
| C | 0.137954  | 5.708232  | -2.362466 |
| H | -1.804856 | 5.634736  | -1.432689 |
| H | 2.134094  | 5.482294  | -3.150899 |
| H | -0.036273 | 6.664050  | -2.848198 |

|    |           |           |           |
|----|-----------|-----------|-----------|
| C  | 1.983165  | 2.281403  | 1.222164  |
| C  | 3.002667  | 3.228825  | 1.035309  |
| C  | 1.700545  | 1.857057  | 2.529876  |
| C  | 3.715773  | 3.731101  | 2.123415  |
| H  | 3.241025  | 3.591890  | 0.042563  |
| C  | 2.409581  | 2.363015  | 3.620396  |
| H  | 0.937575  | 1.102310  | 2.696320  |
| C  | 3.419132  | 3.304226  | 3.419397  |
| H  | 4.501523  | 4.462518  | 1.957034  |
| H  | 2.174663  | 2.016900  | 4.623137  |
| H  | 3.971767  | 3.702835  | 4.265310  |
| C  | -5.899685 | 2.823363  | 0.757148  |
| C  | -5.604701 | 2.351693  | -0.679742 |
| H  | -6.575190 | 2.125248  | 1.268318  |
| H  | -6.370060 | 3.810488  | 0.782217  |
| H  | -6.351280 | 1.654860  | -1.068682 |
| H  | -5.532877 | 3.199812  | -1.373329 |
| C  | -4.534858 | 2.796167  | 1.396504  |
| C  | -3.645066 | 2.057310  | 0.560969  |
| C  | -4.092752 | 3.311481  | 2.586928  |
| H  | -4.755446 | 3.880854  | 3.232809  |
| C  | -2.744643 | 3.090836  | 2.943041  |
| H  | -2.326427 | 3.494343  | 3.858137  |
| C  | -1.950253 | 2.351731  | 2.098321  |
| H  | -0.909232 | 2.182421  | 2.340853  |
| N  | -2.366286 | 1.800853  | 0.910350  |
| N  | -4.288950 | 1.670009  | -0.588052 |
| C  | -3.765784 | 1.111996  | -1.787939 |
| C  | -3.533578 | -0.192787 | -2.010846 |
| C  | -3.607666 | 1.968770  | -3.034062 |
| H  | -4.586676 | 2.274506  | -3.432591 |
| H  | -3.043303 | 2.889584  | -2.841433 |
| C  | -2.876233 | 1.012861  | -4.004397 |
| H  | -3.186593 | 1.145135  | -5.044719 |
| H  | -1.798677 | 1.205001  | -3.954925 |
| C  | -3.164002 | -0.408934 | -3.465722 |
| H  | -4.006638 | -0.886232 | -3.990265 |
| H  | -2.308968 | -1.084744 | -3.590997 |
| Ir | -0.904298 | 0.224669  | 0.322016  |
| H  | -1.629596 | -0.663774 | -0.759198 |
| C  | -3.638302 | -1.344765 | -1.030729 |
| H  | -3.227289 | -2.226344 | -1.542938 |
| C  | -2.777973 | -1.123534 | 0.247347  |
| H  | -2.508533 | -2.082399 | 0.685892  |
| H  | -3.340291 | -0.549159 | 0.987574  |
| C  | -5.115755 | -1.671576 | -0.694467 |



|   |           |           |           |
|---|-----------|-----------|-----------|
| H | -5.544450 | -0.828339 | -0.135144 |
| H | -5.679822 | -1.738629 | -1.635803 |
| C | -5.314773 | -2.971175 | 0.096846  |
| H | -4.850914 | -3.804258 | -0.452483 |
| H | -4.789034 | -2.908214 | 1.059385  |
| C | -6.793264 | -3.295944 | 0.353277  |
| H | -7.321662 | -3.360801 | -0.608288 |
| H | -7.256998 | -2.462112 | 0.899777  |
| C | -6.996607 | -4.596396 | 1.137475  |
| H | -6.577337 | -5.454280 | 0.597843  |
| H | -6.506550 | -4.549723 | 2.117850  |
| H | -8.060150 | -4.797443 | 1.306326  |

#### 14

B3LYP SCF energy: -811.06434751 a.u.  
 B3LYP enthalpy: -810.633035 a.u.  
 B3LYP free energy: -810.704588 a.u.  
 B3LYP-D3(BJ) SCF energy in solution: -811.39757683 a.u.  
 B3LYP-D3(BJ) enthalpy in solution: -810.966264 a.u.  
 B3LYP-D3(BJ) free energy in solution: -811.037817 a.u.

#### Cartesian coordinates

| ATOM | X         | Y         | Z         |
|------|-----------|-----------|-----------|
| C    | 2.485542  | -1.029100 | 2.159496  |
| C    | 1.499131  | 0.153103  | 1.970236  |
| H    | 1.947188  | -1.939962 | 2.455365  |
| H    | 3.226080  | -0.822247 | 2.939053  |
| H    | 0.564842  | 0.017128  | 2.520750  |
| H    | 1.951226  | 1.100455  | 2.302012  |
| C    | 3.077116  | -1.184821 | 0.778580  |
| C    | 2.288470  | -0.452167 | -0.137702 |
| C    | 4.143375  | -1.907816 | 0.285904  |
| H    | 4.783275  | -2.490150 | 0.945294  |
| C    | 4.384323  | -1.869834 | -1.101751 |
| H    | 5.213474  | -2.415554 | -1.540492 |
| C    | 3.534114  | -1.119314 | -1.906595 |
| H    | 3.695543  | -1.078992 | -2.982700 |
| N    | 2.482787  | -0.407046 | -1.453783 |
| N    | 1.248236  | 0.199053  | 0.512974  |
| C    | 0.531023  | 1.284592  | -0.053339 |
| C    | -0.800118 | 1.459746  | 0.045786  |
| C    | 1.215291  | 2.394872  | -0.832274 |
| H    | 2.141158  | 2.735359  | -0.350415 |
| H    | 1.497276  | 2.036876  | -1.829525 |

|   |           |           |           |
|---|-----------|-----------|-----------|
| C | 0.126375  | 3.491157  | -0.878182 |
| H | 0.290364  | 4.203154  | -0.060489 |
| H | 0.134805  | 4.062215  | -1.812230 |
| C | -1.212722 | 2.746842  | -0.645987 |
| H | -1.922135 | 3.344682  | -0.058995 |
| H | -1.718147 | 2.521834  | -1.597692 |
| C | -1.788468 | 0.505464  | 0.671897  |
| H | -1.227145 | -0.387997 | 0.977746  |
| C | -2.843450 | 0.046906  | -0.366733 |
| H | -3.477848 | 0.900861  | -0.645969 |
| H | -2.315813 | -0.256710 | -1.281290 |
| C | -3.733021 | -1.115281 | 0.096493  |
| H | -3.096371 | -1.950336 | 0.425640  |
| H | -4.323184 | -0.816267 | 0.973722  |
| C | -4.689466 | -1.613018 | -0.996689 |
| H | -4.104816 | -1.924219 | -1.873881 |
| H | -5.320990 | -0.778262 | -1.333002 |
| C | -5.578739 | -2.773324 | -0.537564 |
| H | -4.975547 | -3.633998 | -0.222832 |
| H | -6.205570 | -2.480507 | 0.314029  |
| H | -6.244704 | -3.109439 | -1.340678 |
| C | -2.440459 | 1.114924  | 1.931378  |
| H | -3.052376 | 1.989564  | 1.678576  |
| H | -3.089013 | 0.391192  | 2.436600  |
| H | -1.678633 | 1.439682  | 2.649347  |

### 11L-TS

B3LYP SCF energy: -3293.93794310 a.u.

B3LYP enthalpy: -3292.842089 a.u.

B3LYP free energy: -3292.996139 a.u.

B3LYP-D3(BJ) SCF energy in solution: -3295.15940375 a.u.

B3LYP-D3(BJ) enthalpy in solution: -3294.063550 a.u.

B3LYP-D3(BJ) free energy in solution: -3294.217600 a.u.

Imaginary frequency: -371.2607 cm<sup>-1</sup>

### Cartesian coordinates

| ATOM | X         | Y         | Z        |
|------|-----------|-----------|----------|
| C    | -6.019073 | -1.494649 | 1.963054 |
| C    | -4.978683 | -1.108456 | 1.147749 |
| C    | -4.041037 | -0.119749 | 1.565092 |
| C    | -4.220540 | 0.459605  | 2.861587 |
| C    | -5.306067 | 0.045160  | 3.679565 |
| C    | -6.189779 | -0.913362 | 3.242469 |
| H    | -6.718094 | -2.252439 | 1.620439 |

|   |           |           |           |
|---|-----------|-----------|-----------|
| H | -4.868156 | -1.567842 | 0.172706  |
| C | -2.935413 | 0.292137  | 0.736849  |
| C | -3.313807 | 1.458830  | 3.283503  |
| H | -5.423692 | 0.502623  | 4.658640  |
| H | -7.018061 | -1.224724 | 3.872383  |
| C | -2.248109 | 1.820658  | 2.496649  |
| C | -2.009339 | 1.222510  | 1.226093  |
| H | -3.470516 | 1.947260  | 4.242160  |
| H | -1.599316 | 2.608470  | 2.850379  |
| C | -2.908709 | -0.233446 | -0.671124 |
| C | -3.898884 | 0.284043  | -1.588822 |
| C | -2.006002 | -1.200236 | -1.109005 |
| C | -4.852180 | 1.274002  | -1.215847 |
| C | -3.943041 | -0.203646 | -2.935012 |
| C | -2.036005 | -1.625074 | -2.470762 |
| C | -5.799470 | 1.726143  | -2.108469 |
| H | -4.835185 | 1.678948  | -0.211702 |
| C | -4.931807 | 0.279588  | -3.832162 |
| C | -2.979785 | -1.157563 | -3.347729 |
| H | -1.295610 | -2.329438 | -2.827895 |
| C | -5.848681 | 1.222480  | -3.428759 |
| H | -6.517294 | 2.478294  | -1.793537 |
| H | -4.948846 | -0.111500 | -4.846358 |
| H | -2.993698 | -1.512491 | -4.375342 |
| H | -6.604863 | 1.584130  | -4.119531 |
| P | -0.471641 | 1.704897  | 0.252737  |
| P | -0.551388 | -1.722948 | -0.091633 |
| C | 0.313614  | 3.073277  | 1.247148  |
| C | 0.697708  | 2.895586  | 2.589922  |
| C | 0.650768  | 4.289325  | 0.628207  |
| C | 1.372692  | 3.896016  | 3.290272  |
| H | 0.436572  | 1.983591  | 3.116955  |
| C | 1.335646  | 5.287678  | 1.325711  |
| H | 0.374868  | 4.470728  | -0.403874 |
| C | 1.697571  | 5.098155  | 2.659057  |
| H | 1.637351  | 3.736689  | 4.331985  |
| H | 1.577123  | 6.219288  | 0.821746  |
| H | 2.220664  | 5.879097  | 3.203203  |
| C | -1.244592 | 2.697112  | -1.119755 |
| C | -0.865868 | 2.586440  | -2.463873 |
| C | -2.229394 | 3.642433  | -0.777645 |
| C | -1.452937 | 3.396398  | -3.440716 |
| H | -0.120665 | 1.858168  | -2.759497 |
| C | -2.810812 | 4.452279  | -1.750724 |
| H | -2.543135 | 3.750573  | 0.256348  |
| C | -2.423794 | 4.331701  | -3.087874 |

|   |           |           |           |
|---|-----------|-----------|-----------|
| H | -1.147699 | 3.289845  | -4.477958 |
| H | -3.569145 | 5.175670  | -1.464624 |
| H | -2.879023 | 4.961138  | -3.847169 |
| C | -0.170871 | -3.480355 | -0.549778 |
| C | 1.038918  | -3.998040 | -0.057767 |
| C | -1.057228 | -4.355152 | -1.198547 |
| C | 1.365411  | -5.343593 | -0.231922 |
| H | 1.715457  | -3.350262 | 0.489986  |
| C | -0.724663 | -5.699719 | -1.380445 |
| H | -2.018972 | -4.002718 | -1.554284 |
| C | 0.488728  | -6.197302 | -0.904769 |
| H | 2.299633  | -5.728653 | 0.168581  |
| H | -1.424366 | -6.359585 | -1.885750 |
| H | 0.742090  | -7.244494 | -1.042715 |
| C | -1.158928 | -2.081057 | 1.622822  |
| C | -2.201388 | -3.000788 | 1.823866  |
| C | -0.507207 | -1.547119 | 2.739543  |
| C | -2.587465 | -3.362659 | 3.112649  |
| H | -2.712904 | -3.441125 | 0.973707  |
| C | -0.888910 | -1.914957 | 4.032123  |
| H | 0.303037  | -0.844446 | 2.597721  |
| C | -1.930578 | -2.822402 | 4.221376  |
| H | -3.401138 | -4.068624 | 3.251408  |
| H | -0.369268 | -1.493194 | 4.888345  |
| H | -2.228303 | -3.111410 | 5.225305  |
| C | 5.818504  | -2.452730 | 1.270907  |
| C | 5.236122  | -2.871725 | -0.097536 |
| H | 6.759259  | -1.902490 | 1.149689  |
| H | 6.032572  | -3.319469 | 1.903753  |
| H | 5.946005  | -2.713265 | -0.911726 |
| H | 4.938218  | -3.926055 | -0.109006 |
| C | 4.746746  | -1.565380 | 1.846141  |
| C | 3.745708  | -1.325772 | 0.875929  |
| C | 4.645712  | -0.977467 | 3.087207  |
| H | 5.399872  | -1.144567 | 3.851272  |
| C | 3.539655  | -0.146008 | 3.326707  |
| H | 3.406717  | 0.359138  | 4.276906  |
| C | 2.616427  | 0.041047  | 2.314035  |
| H | 1.780170  | 0.704331  | 2.458075  |
| N | 2.677460  | -0.536777 | 1.087605  |
| N | 4.036499  | -2.017652 | -0.296673 |
| C | 3.292512  | -2.086742 | -1.460560 |
| C | 2.258479  | -1.262657 | -1.828645 |
| C | 3.621138  | -3.141989 | -2.502759 |
| H | 4.696367  | -3.259482 | -2.679820 |
| H | 3.241797  | -4.124073 | -2.183437 |

|    |          |           |           |
|----|----------|-----------|-----------|
| C  | 2.870838 | -2.626468 | -3.746706 |
| H  | 3.538711 | -1.987459 | -4.337231 |
| H  | 2.528431 | -3.435675 | -4.398284 |
| C  | 1.719452 | -1.786046 | -3.159211 |
| H  | 1.385076 | -0.986741 | -3.831194 |
| H  | 0.844207 | -2.422522 | -2.978206 |
| Ir | 1.082136 | -0.014275 | -0.551660 |
| H  | 0.192963 | 0.204487  | -1.825559 |
| C  | 3.001384 | 0.603867  | -2.093474 |
| H  | 2.675359 | 0.606923  | -3.129819 |
| C  | 2.487574 | 1.605132  | -1.210402 |
| H  | 1.831346 | 2.332629  | -1.688270 |
| C  | 3.454461 | 2.235206  | -0.216289 |
| H  | 4.168000 | 1.479499  | 0.136138  |
| H  | 2.926716 | 2.601391  | 0.669915  |
| C  | 4.240814 | 3.405822  | -0.839718 |
| H  | 4.792195 | 3.048014  | -1.722141 |
| H  | 3.531857 | 4.161044  | -1.209213 |
| C  | 5.217804 | 4.067036  | 0.141202  |
| H  | 4.656410 | 4.430417  | 1.013336  |
| H  | 5.917780 | 3.309224  | 0.522185  |
| C  | 6.006987 | 5.223961  | -0.481053 |
| H  | 5.336304 | 6.013609  | -0.841457 |
| H  | 6.692291 | 5.675555  | 0.244826  |
| H  | 6.604625 | 4.883449  | -1.335363 |
| H  | 4.039170 | 0.313572  | -1.949837 |

## 12L

B3LYP SCF energy: -3293.96780157 a.u.

B3LYP enthalpy: -3292.869268 a.u.

B3LYP free energy: -3293.023687 a.u.

B3LYP-D3(BJ) SCF energy in solution: -3295.18872683 a.u.

B3LYP-D3(BJ) enthalpy in solution: -3294.090193 a.u.

B3LYP-D3(BJ) free energy in solution: -3294.244612 a.u.

## Cartesian coordinates

| ATOM | X        | Y         | Z        |
|------|----------|-----------|----------|
| C    | 6.317571 | 0.713759  | 1.579318 |
| C    | 5.158315 | 0.523814  | 0.859994 |
| C    | 4.115797 | -0.320468 | 1.344304 |
| C    | 4.318333 | -0.956354 | 2.610045 |
| C    | 5.528691 | -0.751904 | 3.324952 |
| C    | 6.512408 | 0.067240  | 2.823085 |
| H    | 7.092635 | 1.365216  | 1.185592 |

|   |           |           |           |
|---|-----------|-----------|-----------|
| H | 5.038259  | 1.031386  | -0.089193 |
| C | 2.881523  | -0.525681 | 0.621055  |
| C | 3.292780  | -1.785361 | 3.118420  |
| H | 5.658510  | -1.253663 | 4.280420  |
| H | 7.434927  | 0.221029  | 3.375316  |
| C | 2.113084  | -1.944362 | 2.437361  |
| C | 1.867109  | -1.304180 | 1.186027  |
| H | 3.445128  | -2.299420 | 4.064130  |
| H | 1.365567  | -2.594792 | 2.866094  |
| C | 2.813092  | 0.112603  | -0.736201 |
| C | 3.641520  | -0.442207 | -1.777867 |
| C | 2.077214  | 1.271752  | -0.981970 |
| C | 4.371041  | -1.654099 | -1.611085 |
| C | 3.748222  | 0.232308  | -3.037644 |
| C | 2.200532  | 1.922095  | -2.244782 |
| C | 5.156188  | -2.157686 | -2.624235 |
| H | 4.296482  | -2.193463 | -0.674719 |
| C | 4.575061  | -0.305927 | -4.059761 |
| C | 3.022748  | 1.433391  | -3.229225 |
| H | 1.639885  | 2.828868  | -2.434981 |
| C | 5.267821  | -1.477254 | -3.860044 |
| H | 5.697138  | -3.087443 | -2.473053 |
| H | 4.647224  | 0.226435  | -5.004844 |
| H | 3.114560  | 1.961961  | -4.174938 |
| H | 5.897279  | -1.883253 | -4.646577 |
| P | 0.224966  | -1.648116 | 0.327196  |
| P | 0.659503  | 1.780816  | 0.093218  |
| C | -0.644152 | -2.740850 | 1.549248  |
| C | -0.965617 | -2.241729 | 2.825326  |
| C | -1.050075 | -4.042836 | 1.222116  |
| C | -1.664314 | -3.022327 | 3.745441  |
| H | -0.629133 | -1.251567 | 3.119257  |
| C | -1.756300 | -4.822479 | 2.143087  |
| H | -0.822603 | -4.458220 | 0.247625  |
| C | -2.066337 | -4.317069 | 3.404899  |
| H | -1.886659 | -2.623544 | 4.731451  |
| H | -2.059513 | -5.828749 | 1.868561  |
| H | -2.609571 | -4.926495 | 4.121207  |
| C | 0.798153  | -2.866472 | -0.956221 |
| C | 0.423420  | -2.801928 | -2.303785 |
| C | 1.648381  | -3.911538 | -0.547360 |
| C | 0.878116  | -3.755608 | -3.218942 |
| H | -0.217681 | -1.999780 | -2.646202 |
| C | 2.095961  | -4.865981 | -1.458812 |
| H | 1.964239  | -3.984784 | 0.488693  |
| C | 1.711197  | -4.791175 | -2.799927 |

|   |           |           |           |
|---|-----------|-----------|-----------|
| H | 0.577481  | -3.683690 | -4.260422 |
| H | 2.748722  | -5.665889 | -1.120692 |
| H | 2.062254  | -5.533219 | -3.511279 |
| C | 0.488961  | 3.620686  | -0.124377 |
| C | -0.732496 | 4.207236  | 0.242407  |
| C | 1.561773  | 4.464060  | -0.458085 |
| C | -0.887005 | 5.594275  | 0.251049  |
| H | -1.566632 | 3.576408  | 0.527495  |
| C | 1.402812  | 5.851119  | -0.459495 |
| H | 2.530023  | 4.048166  | -0.715804 |
| C | 0.178259  | 6.421148  | -0.108251 |
| H | -1.839552 | 6.028484  | 0.542623  |
| H | 2.242938  | 6.485504  | -0.727969 |
| H | 0.058674  | 7.500710  | -0.105894 |
| C | 1.221860  | 1.865004  | 1.858457  |
| C | 2.468397  | 2.406780  | 2.206094  |
| C | 0.315490  | 1.547674  | 2.877934  |
| C | 2.807290  | 2.600295  | 3.544202  |
| H | 3.182044  | 2.676686  | 1.434583  |
| C | 0.651014  | 1.752020  | 4.219007  |
| H | -0.663220 | 1.159172  | 2.623298  |
| C | 1.899536  | 2.274184  | 4.555246  |
| H | 3.781667  | 3.008768  | 3.796532  |
| H | -0.067092 | 1.508654  | 4.997676  |
| H | 2.163274  | 2.433685  | 5.596887  |
| C | -5.240170 | 3.399930  | 0.007212  |
| C | -4.435719 | 3.186366  | -1.309421 |
| H | -6.313518 | 3.256876  | -0.151394 |
| H | -5.105854 | 4.418955  | 0.389467  |
| H | -5.047082 | 2.708869  | -2.086463 |
| H | -4.045396 | 4.123777  | -1.714170 |
| C | -4.645324 | 2.383190  | 0.956082  |
| C | -3.525761 | 1.790534  | 0.332635  |
| C | -4.959891 | 1.994086  | 2.237407  |
| H | -5.809358 | 2.417823  | 2.766210  |
| C | -4.145824 | 1.015480  | 2.848864  |
| H | -4.359899 | 0.658718  | 3.850112  |
| C | -3.068245 | 0.496788  | 2.154877  |
| H | -2.453778 | -0.278706 | 2.589840  |
| N | -2.723923 | 0.877086  | 0.895183  |
| N | -3.324079 | 2.285854  | -0.923805 |
| C | -2.394937 | 1.761808  | -1.868196 |
| C | -2.507512 | 0.513260  | -2.481846 |
| C | -1.674511 | 2.733246  | -2.801615 |
| H | -2.436955 | 3.348663  | -3.303794 |
| H | -1.002183 | 3.423947  | -2.291339 |

|    |           |           |           |
|----|-----------|-----------|-----------|
| C  | -0.970979 | 1.817596  | -3.824084 |
| H  | -0.905684 | 2.271409  | -4.817133 |
| H  | 0.044114  | 1.596341  | -3.491679 |
| C  | -1.801177 | 0.522365  | -3.818046 |
| H  | -2.603620 | 0.555560  | -4.573873 |
| H  | -1.217601 | -0.379739 | -4.025363 |
| Ir | -1.107038 | 0.121026  | -0.550297 |
| H  | -0.124126 | -0.211763 | -1.734449 |
| C  | -3.456826 | -0.587108 | -2.114435 |
| H  | -3.767545 | -1.153664 | -3.001509 |
| C  | -2.650665 | -1.394852 | -1.089546 |
| H  | -2.132066 | -2.210280 | -1.599343 |
| C  | -3.568499 | -1.975226 | -0.006235 |
| H  | -4.245880 | -1.193012 | 0.358114  |
| H  | -3.005766 | -2.319925 | 0.862399  |
| C  | -4.420171 | -3.149171 | -0.529784 |
| H  | -3.754675 | -3.959577 | -0.862303 |
| H  | -4.987423 | -2.836746 | -1.418853 |
| C  | -5.398501 | -3.696513 | 0.519294  |
| H  | -6.062890 | -2.885558 | 0.850765  |
| H  | -4.832698 | -4.009806 | 1.407850  |
| H  | -4.365685 | -0.172244 | -1.658740 |
| C  | -6.240906 | -4.869535 | 0.006729  |
| H  | -6.925487 | -5.237161 | 0.779347  |
| H  | -6.845340 | -4.576034 | -0.860233 |
| H  | -5.606483 | -5.709288 | -0.302717 |

### 13L-TS

B3LYP SCF energy: -3293.94878743 a.u.

B3LYP enthalpy: -3292.853062 a.u.

B3LYP free energy: -3293.008255 a.u.

B3LYP-D3(BJ) SCF energy in solution: -3295.17232436 a.u.

B3LYP-D3(BJ) enthalpy in solution: -3294.076599 a.u.

B3LYP-D3(BJ) free energy in solution: -3294.231792 a.u.

Imaginary frequency: -842.6316 cm<sup>-1</sup>

### Cartesian coordinates

| ATOM | X         | Y         | Z         |
|------|-----------|-----------|-----------|
| C    | -6.371487 | 1.383120  | -1.016815 |
| C    | -5.164014 | 1.086815  | -0.424779 |
| C    | -4.346594 | 0.025907  | -0.911103 |
| C    | -4.818954 | -0.720562 | -2.038580 |
| C    | -6.072414 | -0.395551 | -2.623557 |
| C    | -6.835508 | 0.634525  | -2.125671 |



|   |           |           |           |
|---|-----------|-----------|-----------|
| H | -6.976527 | 2.197440  | -0.628217 |
| H | -4.826839 | 1.669592  | 0.424736  |
| C | -3.074565 | -0.298558 | -0.324643 |
| C | -4.019536 | -1.775580 | -2.538025 |
| H | -6.415213 | -0.977076 | -3.475548 |
| H | -7.792557 | 0.876601  | -2.578659 |
| C | -2.793618 | -2.055239 | -1.985032 |
| C | -2.286169 | -1.308458 | -0.884523 |
| H | -4.385920 | -2.366499 | -3.373801 |
| H | -2.214438 | -2.871384 | -2.395575 |
| C | -2.651843 | 0.424253  | 0.919819  |
| C | -3.347875 | 0.133972  | 2.150852  |
| C | -1.594872 | 1.331468  | 0.922448  |
| C | -4.419405 | -0.800583 | 2.226768  |
| C | -2.952598 | 0.793866  | 3.359792  |
| C | -1.174443 | 1.920002  | 2.153477  |
| C | -5.076798 | -1.036204 | 3.414561  |
| H | -4.722746 | -1.336321 | 1.335775  |
| C | -3.654006 | 0.535971  | 4.566697  |
| C | -1.843041 | 1.676654  | 3.325370  |
| H | -0.314140 | 2.579103  | 2.161863  |
| C | -4.700840 | -0.356656 | 4.596396  |
| H | -5.893421 | -1.751978 | 3.443112  |
| H | -3.344163 | 1.056021  | 5.469739  |
| H | -1.522131 | 2.156460  | 4.246921  |
| H | -5.233774 | -0.546750 | 5.523546  |
| P | -0.591599 | -1.716422 | -0.201118 |
| P | -0.487423 | 1.610707  | -0.535683 |
| C | -0.014064 | -3.124477 | -1.258084 |
| C | 0.221333  | -2.893585 | -2.627190 |
| C | 0.303298  | -4.383637 | -0.729048 |
| C | 0.725924  | -3.901557 | -3.446836 |
| H | -0.004321 | -1.922812 | -3.058263 |
| C | 0.824662  | -5.389328 | -1.549532 |
| H | 0.145235  | -4.590938 | 0.323305  |
| C | 1.030865  | -5.155592 | -2.908514 |
| H | 0.885042  | -3.707685 | -4.503962 |
| H | 1.062256  | -6.358693 | -1.120526 |
| H | 1.425592  | -5.941844 | -3.545527 |
| C | -1.037003 | -2.514608 | 1.403384  |
| C | -0.466749 | -2.090157 | 2.609381  |
| C | -1.988217 | -3.550516 | 1.429846  |
| C | -0.817696 | -2.702262 | 3.815587  |
| H | 0.231376  | -1.261017 | 2.607450  |
| C | -2.332752 | -4.164402 | 2.632625  |
| H | -2.461077 | -3.880625 | 0.509205  |

|   |           |           |           |
|---|-----------|-----------|-----------|
| C | -1.744506 | -3.743835 | 3.828879  |
| H | -0.371126 | -2.357216 | 4.744015  |
| H | -3.063758 | -4.968009 | 2.636923  |
| H | -2.016143 | -4.221065 | 4.766126  |
| C | -0.011225 | 3.405304  | -0.413830 |
| C | 1.069007  | 3.868673  | -1.181162 |
| C | -0.794614 | 4.351908  | 0.269767  |
| C | 1.377523  | 5.228960  | -1.237807 |
| H | 1.660511  | 3.173062  | -1.763761 |
| C | -0.482149 | 5.711340  | 0.216075  |
| H | -1.658109 | 4.038465  | 0.845639  |
| C | 0.608372  | 6.155303  | -0.532768 |
| H | 2.216448  | 5.561840  | -1.842846 |
| H | -1.101165 | 6.423286  | 0.755008  |
| H | 0.847211  | 7.214101  | -0.577111 |
| C | -1.471676 | 1.734205  | -2.097706 |
| C | -2.569891 | 2.599802  | -2.217678 |
| C | -1.011554 | 1.061422  | -3.237903 |
| C | -3.205029 | 2.767874  | -3.446558 |
| H | -2.930971 | 3.146980  | -1.352442 |
| C | -1.641240 | 1.238236  | -4.472272 |
| H | -0.152181 | 0.400104  | -3.159034 |
| C | -2.741037 | 2.089648  | -4.577130 |
| H | -4.060972 | 3.432179  | -3.522807 |
| H | -1.271312 | 0.712576  | -5.348370 |
| H | -3.233011 | 2.229377  | -5.535481 |
| C | 5.099955  | 3.724586  | 0.655467  |
| C | 4.304598  | 3.292796  | 1.910115  |
| H | 6.170927  | 3.518555  | 0.769717  |
| H | 4.996391  | 4.796182  | 0.459403  |
| H | 4.960607  | 3.024436  | 2.741518  |
| H | 3.622614  | 4.079092  | 2.251818  |
| C | 4.498006  | 2.884650  | -0.441201 |
| C | 3.568529  | 1.963913  | 0.121171  |
| C | 4.743341  | 2.876929  | -1.791174 |
| H | 5.465705  | 3.557314  | -2.233846 |
| C | 4.038125  | 1.950069  | -2.589330 |
| H | 4.198792  | 1.885742  | -3.659470 |
| C | 3.114531  | 1.127723  | -1.983775 |
| H | 2.531900  | 0.423530  | -2.567286 |
| N | 2.831414  | 1.133616  | -0.643789 |
| N | 3.523112  | 2.098677  | 1.489803  |
| C | 3.139388  | 1.177501  | 2.488590  |
| C | 3.305278  | -0.160896 | 2.488224  |
| C | 2.594856  | 1.699939  | 3.804727  |
| H | 3.379422  | 2.207887  | 4.384825  |

|    |          |           |           |
|----|----------|-----------|-----------|
| H  | 1.789253 | 2.431163  | 3.663275  |
| C  | 2.112252 | 0.411854  | 4.511721  |
| H  | 2.271351 | 0.439676  | 5.593498  |
| H  | 1.036425 | 0.293126  | 4.340967  |
| C  | 2.878559 | -0.742332 | 3.821971  |
| H  | 3.772157 | -1.039594 | 4.392866  |
| H  | 2.270229 | -1.650087 | 3.723435  |
| Ir | 1.094715 | -0.121329 | -0.241401 |
| H  | 1.623055 | -0.786632 | 1.098219  |
| C  | 3.851605 | -1.008411 | 1.376770  |
| H  | 4.471689 | -1.805693 | 1.807495  |
| C  | 2.758623 | -1.661730 | 0.485065  |
| H  | 2.323745 | -2.514220 | 1.019456  |
| H  | 4.518573 | -0.414588 | 0.741454  |
| C  | 3.349120 | -2.184410 | -0.837093 |
| H  | 3.831899 | -1.361555 | -1.378753 |
| H  | 2.554703 | -2.567388 | -1.481283 |
| C  | 4.386895 | -3.309616 | -0.628341 |
| H  | 5.228098 | -2.942956 | -0.025044 |
| H  | 3.925487 | -4.127353 | -0.055616 |
| C  | 4.931606 | -3.863342 | -1.952702 |
| H  | 5.369749 | -3.040445 | -2.535942 |
| H  | 4.096343 | -4.252939 | -2.550586 |
| C  | 5.980872 | -4.962907 | -1.755785 |
| H  | 6.349066 | -5.339134 | -2.716721 |
| H  | 6.844604 | -4.590972 | -1.191396 |
| H  | 5.565279 | -5.813579 | -1.202002 |

#### 14L

B3LYP SCF energy: -811.06657399 a.u.  
 B3LYP enthalpy: -810.635047 a.u.  
 B3LYP free energy: -810.707469 a.u.  
 B3LYP-D3(BJ) SCF energy in solution: -811.39782318 a.u.  
 B3LYP-D3(BJ) enthalpy in solution: -810.966296 a.u.  
 B3LYP-D3(BJ) free energy in solution: -811.038718 a.u.

#### Cartesian coordinates

| ATOM | X        | Y         | Z        |
|------|----------|-----------|----------|
| C    | 2.720056 | -1.412372 | 2.046932 |
| C    | 1.869150 | -0.115850 | 2.008010 |
| H    | 2.087478 | -2.285674 | 2.257386 |
| H    | 3.488435 | -1.373226 | 2.826011 |
| H    | 0.932290 | -0.206094 | 2.563712 |
| H    | 2.428356 | 0.734970  | 2.426686 |

|   |           |           |           |
|---|-----------|-----------|-----------|
| C | 3.274014  | -1.481692 | 0.643418  |
| C | 2.560982  | -0.572422 | -0.170823 |
| C | 4.246831  | -2.259643 | 0.051173  |
| H | 4.825707  | -2.976538 | 0.629378  |
| C | 4.473451  | -2.098434 | -1.330028 |
| H | 5.230903  | -2.681350 | -1.844092 |
| C | 3.703089  | -1.176104 | -2.029888 |
| H | 3.855264  | -1.037280 | -3.099110 |
| N | 2.743518  | -0.405883 | -1.478792 |
| N | 1.607410  | 0.113853  | 0.570097  |
| C | 1.006099  | 1.324640  | 0.141722  |
| C | -0.292653 | 1.634525  | 0.309441  |
| C | 1.791493  | 2.433607  | -0.537515 |
| H | 2.761538  | 2.615251  | -0.056472 |
| H | 2.007347  | 2.160858  | -1.577281 |
| C | 0.833080  | 3.642438  | -0.423920 |
| H | 1.103889  | 4.241587  | 0.453516  |
| H | 0.877608  | 4.304605  | -1.294607 |
| C | -0.575009 | 3.030758  | -0.210406 |
| H | -1.187895 | 3.624249  | 0.482389  |
| H | -1.141766 | 2.982076  | -1.152737 |
| C | -1.369196 | 0.747013  | 0.866567  |
| H | -0.941644 | -0.233536 | 1.108565  |
| C | -2.564137 | 0.547163  | -0.088608 |
| H | -3.016139 | 1.520474  | -0.324308 |
| H | -2.196300 | 0.138752  | -1.040004 |
| C | -3.638733 | -0.382160 | 0.489383  |
| H | -3.187677 | -1.358410 | 0.721747  |
| H | -3.993049 | 0.024408  | 1.448777  |
| C | -4.837201 | -0.588438 | -0.446411 |
| H | -4.483383 | -0.993455 | -1.406238 |
| H | -5.290027 | 0.387330  | -0.678126 |
| C | -5.912032 | -1.519734 | 0.129350  |
| H | -5.459989 | -2.495174 | 0.359224  |
| H | -6.265258 | -1.115368 | 1.088836  |
| H | -1.749400 | 1.169805  | 1.811179  |
| C | -7.105766 | -1.719243 | -0.810729 |
| H | -7.854869 | -2.388265 | -0.371614 |
| H | -7.600014 | -0.764924 | -1.031543 |
| H | -6.789015 | -2.155185 | -1.766412 |

### 15-TS

B3LYP SCF energy: -3293.95115384 a.u.

B3LYP enthalpy: -3292.856333 a.u.

B3LYP free energy: -3293.008684 a.u.  
B3LYP-D3(BJ) SCF energy in solution: -3295.17135402 a.u.  
B3LYP-D3(BJ) enthalpy in solution: -3294.076533 a.u.  
B3LYP-D3(BJ) free energy in solution: -3294.228884 a.u.  
Imaginary frequency: -732.0190 cm-1

Cartesian coordinates

| ATOM | X         | Y         | Z         |
|------|-----------|-----------|-----------|
| C    | 6.473020  | -1.243105 | -0.234474 |
| C    | 5.172248  | -1.009821 | 0.154661  |
| C    | 4.430469  | 0.096754  | -0.355376 |
| C    | 5.097276  | 0.957349  | -1.283979 |
| C    | 6.442750  | 0.700339  | -1.659503 |
| C    | 7.122014  | -0.379921 | -1.147961 |
| H    | 7.007926  | -2.097740 | 0.170006  |
| H    | 4.708544  | -1.687501 | 0.860101  |
| C    | 3.053672  | 0.356782  | 0.023250  |
| C    | 4.393324  | 2.071753  | -1.794923 |
| H    | 6.923174  | 1.376374  | -2.362054 |
| H    | 8.150660  | -0.571596 | -1.439113 |
| C    | 3.077415  | 2.273245  | -1.473409 |
| C    | 2.360322  | 1.400037  | -0.595059 |
| H    | 4.903486  | 2.766779  | -2.456908 |
| H    | 2.577723  | 3.133850  | -1.893589 |
| C    | 2.560832  | -0.506461 | 1.153415  |
| C    | 3.168372  | -0.272755 | 2.439621  |
| C    | 1.740615  | -1.623620 | 0.976176  |
| C    | 3.912285  | 0.907710  | 2.729628  |
| C    | 3.034831  | -1.249539 | 3.480202  |
| C    | 1.665771  | -2.603110 | 2.006881  |
| C    | 4.475191  | 1.108113  | 3.969807  |
| H    | 4.024305  | 1.665847  | 1.963522  |
| C    | 3.642161  | -1.021629 | 4.744777  |
| C    | 2.314823  | -2.436927 | 3.206299  |
| H    | 1.094473  | -3.507306 | 1.844402  |
| C    | 4.346862  | 0.133324  | 4.988795  |
| H    | 5.026492  | 2.022581  | 4.169160  |
| H    | 3.533782  | -1.778553 | 5.517347  |
| H    | 2.260655  | -3.211886 | 3.966810  |
| H    | 4.804469  | 0.302246  | 5.959170  |
| P    | 0.539985  | 1.787199  | -0.365470 |
| P    | 0.574979  | -1.729864 | -0.463667 |
| C    | 0.244270  | 2.905249  | -1.829306 |
| C    | 0.491277  | 2.427330  | -3.131061 |
| C    | -0.249276 | 4.207621  | -1.678106 |
| C    | 0.252404  | 3.231231  | -4.243262 |

|   |           |           |           |
|---|-----------|-----------|-----------|
| H | 0.890868  | 1.427914  | -3.275183 |
| C | -0.500025 | 5.009932  | -2.797711 |
| H | -0.435255 | 4.612001  | -0.689469 |
| C | -0.250673 | 4.526747  | -4.080131 |
| H | 0.460848  | 2.848267  | -5.238460 |
| H | -0.884374 | 6.016208  | -2.657622 |
| H | -0.439052 | 5.152602  | -4.947622 |
| C | 0.513188  | 3.006867  | 1.029563  |
| C | -0.668423 | 3.243417  | 1.750707  |
| C | 1.645771  | 3.787203  | 1.313903  |
| C | -0.716292 | 4.240608  | 2.725974  |
| H | -1.541373 | 2.626175  | 1.573232  |
| C | 1.596294  | 4.778959  | 2.294919  |
| H | 2.569704  | 3.630824  | 0.767670  |
| C | 0.415142  | 5.011074  | 3.000901  |
| H | -1.637624 | 4.408060  | 3.276886  |
| H | 2.482957  | 5.370824  | 2.503798  |
| H | 0.377460  | 5.784486  | 3.762695  |
| C | -0.174074 | -3.419553 | -0.324337 |
| C | -1.061471 | -3.693658 | 0.733062  |
| C | 0.093423  | -4.435231 | -1.254345 |
| C | -1.643383 | -4.953230 | 0.865944  |
| H | -1.291470 | -2.916045 | 1.454584  |
| C | -0.502566 | -5.693178 | -1.125803 |
| H | 0.768464  | -4.257183 | -2.083070 |
| C | -1.367678 | -5.958025 | -0.065654 |
| H | -2.314549 | -5.150122 | 1.697626  |
| H | -0.280707 | -6.465884 | -1.856499 |
| H | -1.823700 | -6.938652 | 0.036879  |
| C | 1.648957  | -1.905331 | -1.956593 |
| C | 2.865747  | -2.601393 | -1.870174 |
| C | 1.225213  | -1.445442 | -3.210923 |
| C | 3.643325  | -2.816862 | -3.008098 |
| H | 3.208645  | -2.977982 | -0.911891 |
| C | 1.999436  | -1.667562 | -4.351845 |
| H | 0.284700  | -0.909705 | -3.295353 |
| C | 3.212696  | -2.350345 | -4.251860 |
| H | 4.586943  | -3.347323 | -2.920026 |
| H | 1.654491  | -1.305704 | -5.316582 |
| H | 3.818594  | -2.519216 | -5.137435 |
| C | -5.619215 | -2.491031 | 1.261744  |
| C | -4.879877 | -1.527940 | 2.224790  |
| H | -6.652193 | -2.175297 | 1.087322  |
| H | -5.658259 | -3.508809 | 1.668646  |
| H | -5.433340 | -0.591001 | 2.367543  |
| H | -4.712201 | -1.971795 | 3.207756  |

|    |           |           |           |
|----|-----------|-----------|-----------|
| C  | -4.777480 | -2.442835 | 0.010317  |
| C  | -3.608900 | -1.678340 | 0.277831  |
| C  | -4.939049 | -3.024060 | -1.219714 |
| H  | -5.814227 | -3.625556 | -1.449394 |
| C  | -3.918263 | -2.834678 | -2.181854 |
| H  | -3.980162 | -3.287398 | -3.164843 |
| C  | -2.831307 | -2.056512 | -1.859277 |
| H  | -2.037811 | -1.887791 | -2.575348 |
| N  | -2.665211 | -1.431948 | -0.651061 |
| N  | -3.586827 | -1.243337 | 1.565450  |
| C  | -2.513600 | -0.613120 | 2.228795  |
| C  | -1.381181 | -0.118571 | 1.668837  |
| C  | -2.527045 | -0.592195 | 3.750735  |
| H  | -3.470594 | -0.231963 | 4.178346  |
| H  | -2.360038 | -1.601542 | 4.162870  |
| C  | -1.345663 | 0.343133  | 4.059148  |
| H  | -1.706580 | 1.376838  | 4.128983  |
| H  | -0.843715 | 0.102791  | 5.001804  |
| C  | -0.432228 | 0.194057  | 2.827781  |
| H  | 0.201334  | 1.067436  | 2.675545  |
| H  | 0.246438  | -0.652855 | 2.979889  |
| Ir | -1.089542 | 0.048711  | -0.434051 |
| H  | -1.060571 | 0.125186  | -2.132749 |
| C  | -2.650752 | 1.622414  | -0.736981 |
| H  | -2.218888 | 2.597326  | -0.519782 |
| C  | -2.337866 | 1.130556  | -2.050407 |
| H  | -1.827844 | 1.776518  | -2.754487 |
| H  | -3.043623 | 0.444790  | -2.514810 |
| C  | -4.047171 | 1.491436  | -0.153204 |
| H  | -3.986556 | 1.405198  | 0.938619  |
| H  | -4.531921 | 0.580340  | -0.521289 |
| C  | -4.934020 | 2.700397  | -0.512635 |
| H  | -5.000829 | 2.792327  | -1.606412 |
| H  | -4.453701 | 3.623760  | -0.156903 |
| C  | -6.347197 | 2.606308  | 0.078504  |
| H  | -6.275188 | 2.509391  | 1.171636  |
| H  | -6.828392 | 1.684999  | -0.280484 |
| C  | -7.227501 | 3.810965  | -0.270808 |
| H  | -7.345057 | 3.914038  | -1.356297 |
| H  | -8.228001 | 3.713373  | 0.164611  |
| H  | -6.790089 | 4.743734  | 0.105311  |

## 16

B3LYP SCF energy: -3293.97111076 a.u.

B3LYP enthalpy: -3292.871931 a.u.  
B3LYP free energy: -3293.027978 a.u.  
B3LYP-D3(BJ) SCF energy in solution: -3295.19938392 a.u.  
B3LYP-D3(BJ) enthalpy in solution: -3294.100204 a.u.  
B3LYP-D3(BJ) free energy in solution: -3294.256251 a.u.

Cartesian coordinates

| ATOM | X         | Y         | Z         |
|------|-----------|-----------|-----------|
| C    | -6.545588 | 1.051666  | 0.089345  |
| C    | -5.225520 | 0.828957  | 0.414943  |
| C    | -4.454348 | -0.171809 | -0.247609 |
| C    | -5.111215 | -0.936830 | -1.263245 |
| C    | -6.476151 | -0.693336 | -1.571679 |
| C    | -7.184657 | 0.282225  | -0.910580 |
| H    | -7.103067 | 1.823909  | 0.611784  |
| H    | -4.769724 | 1.433312  | 1.189077  |
| C    | -3.059307 | -0.418828 | 0.064927  |
| C    | -4.376239 | -1.940997 | -1.936062 |
| H    | -6.948376 | -1.295199 | -2.343834 |
| H    | -8.228298 | 0.462947  | -1.150871 |
| C    | -3.048248 | -2.134369 | -1.663449 |
| C    | -2.350127 | -1.362865 | -0.680770 |
| H    | -4.873717 | -2.555516 | -2.682019 |
| H    | -2.519858 | -2.905460 | -2.207456 |
| C    | -2.552254 | 0.343761  | 1.260295  |
| C    | -3.080054 | -0.054682 | 2.540799  |
| C    | -1.786073 | 1.510998  | 1.167149  |
| C    | -3.770174 | -1.287395 | 2.730952  |
| C    | -2.915012 | 0.799937  | 3.680151  |
| C    | -1.680427 | 2.365949  | 2.301316  |
| C    | -4.249155 | -1.652089 | 3.968903  |
| H    | -3.906555 | -1.954397 | 1.887953  |
| C    | -3.436492 | 0.403312  | 4.941459  |
| C    | -2.247294 | 2.036405  | 3.508612  |
| H    | -1.147720 | 3.303765  | 2.211374  |
| C    | -4.088298 | -0.798512 | 5.087183  |
| H    | -4.759573 | -2.603318 | 4.089519  |
| H    | -3.305525 | 1.069160  | 5.790653  |
| H    | -2.169760 | 2.718985  | 4.351247  |
| H    | -4.480068 | -1.096333 | 6.055355  |
| P    | -0.525830 | -1.742750 | -0.509760 |
| P    | -0.667641 | 1.822827  | -0.279151 |
| C    | -0.183737 | -2.513536 | -2.166410 |
| C    | -0.397781 | -1.751419 | -3.329156 |
| C    | 0.328805  | -3.811327 | -2.296062 |
| C    | -0.105023 | -2.275807 | -4.587606 |



|   |           |           |           |
|---|-----------|-----------|-----------|
| H | -0.830309 | -0.758024 | -3.257482 |
| C | 0.627763  | -4.331932 | -3.558804 |
| H | 0.490484  | -4.426605 | -1.417604 |
| C | 0.414595  | -3.567506 | -4.705917 |
| H | -0.289453 | -1.678011 | -5.476027 |
| H | 1.021530  | -5.341045 | -3.640842 |
| H | 0.642277  | -3.977111 | -5.685767 |
| C | -0.467846 | -3.189547 | 0.642636  |
| C | 0.725091  | -3.519880 | 1.307588  |
| C | -1.587726 | -4.020214 | 0.811372  |
| C | 0.795588  | -4.655961 | 2.114913  |
| H | 1.595487  | -2.882916 | 1.206115  |
| C | -1.514255 | -5.153319 | 1.623355  |
| H | -2.520669 | -3.791751 | 0.307546  |
| C | -0.323374 | -5.475276 | 2.275583  |
| H | 1.725901  | -4.896477 | 2.621767  |
| H | -2.390783 | -5.783595 | 1.743825  |
| H | -0.267863 | -6.357549 | 2.906765  |
| C | 0.015513  | 3.524062  | 0.002404  |
| C | 0.987204  | 3.713676  | 1.002041  |
| C | -0.376434 | 4.630014  | -0.767782 |
| C | 1.534026  | 4.975068  | 1.235519  |
| H | 1.305988  | 2.871953  | 1.607819  |
| C | 0.183895  | 5.889879  | -0.541001 |
| H | -1.121925 | 4.519115  | -1.546577 |
| C | 1.137003  | 6.067935  | 0.461036  |
| H | 2.272171  | 5.103879  | 2.022709  |
| H | -0.134243 | 6.732886  | -1.147948 |
| H | 1.566190  | 7.049729  | 0.639710  |
| C | -1.738880 | 2.089148  | -1.755197 |
| C | -3.040484 | 2.600925  | -1.646973 |
| C | -1.206681 | 1.866171  | -3.034863 |
| C | -3.796373 | 2.863566  | -2.790542 |
| H | -3.466866 | 2.794718  | -0.668462 |
| C | -1.957956 | 2.138103  | -4.179624 |
| H | -0.193639 | 1.486882  | -3.143073 |
| C | -3.257855 | 2.632985  | -4.058146 |
| H | -4.806844 | 3.248500  | -2.688429 |
| H | -1.529029 | 1.964213  | -5.162594 |
| H | -3.846748 | 2.841085  | -4.946786 |
| C | 5.507854  | 2.730059  | 1.196681  |
| C | 4.851056  | 1.710722  | 2.164367  |
| H | 6.567457  | 2.510657  | 1.036541  |
| H | 5.444960  | 3.750355  | 1.594839  |
| H | 5.465524  | 0.809100  | 2.280801  |
| H | 4.674069  | 2.131010  | 3.156417  |

|    |           |           |           |
|----|-----------|-----------|-----------|
| C  | 4.682470  | 2.596664  | -0.061078 |
| C  | 3.565259  | 1.772354  | 0.223841  |
| C  | 4.804554  | 3.150409  | -1.310173 |
| H  | 5.639657  | 3.797726  | -1.562599 |
| C  | 3.797952  | 2.867424  | -2.264045 |
| H  | 3.837252  | 3.285873  | -3.263120 |
| C  | 2.754877  | 2.040718  | -1.912068 |
| H  | 1.975491  | 1.795483  | -2.624138 |
| N  | 2.627134  | 1.457658  | -0.683443 |
| N  | 3.567253  | 1.355231  | 1.520349  |
| C  | 2.565494  | 0.604835  | 2.151183  |
| C  | 1.472015  | 0.034613  | 1.584649  |
| C  | 2.583216  | 0.476055  | 3.664390  |
| H  | 3.560623  | 0.179004  | 4.063169  |
| H  | 2.323257  | 1.433711  | 4.144176  |
| C  | 1.500828  | -0.592398 | 3.911976  |
| H  | 1.965895  | -1.585326 | 3.924059  |
| H  | 0.979436  | -0.457563 | 4.864480  |
| C  | 0.561011  | -0.476810 | 2.694042  |
| H  | 0.063610  | -1.419200 | 2.468626  |
| H  | -0.227844 | 0.254726  | 2.892895  |
| Ir | 1.093939  | -0.006509 | -0.399835 |
| C  | 2.628819  | -1.481659 | -0.851811 |
| H  | 2.158050  | -2.468049 | -0.817730 |
| C  | 2.972180  | -1.197480 | -2.327993 |
| H  | 2.107193  | -0.859629 | -2.917246 |
| H  | 3.329188  | -2.103565 | -2.834951 |
| C  | 3.896556  | -1.582316 | 0.009707  |
| H  | 3.624217  | -1.664291 | 1.069152  |
| H  | 4.491089  | -0.663871 | -0.084144 |
| C  | 4.799479  | -2.778819 | -0.350083 |
| H  | 5.132606  | -2.700130 | -1.393782 |
| H  | 4.213772  | -3.708627 | -0.285928 |
| C  | 6.031946  | -2.897092 | 0.557498  |
| H  | 5.704803  | -2.983730 | 1.604064  |
| H  | 6.615278  | -1.966551 | 0.496454  |
| C  | 6.933287  | -4.085142 | 0.204486  |
| H  | 7.305558  | -4.007925 | -0.824276 |
| H  | 7.802365  | -4.139803 | 0.869575  |
| H  | 6.389546  | -5.034039 | 0.288926  |
| H  | 3.751798  | -0.433912 | -2.420552 |

### 17-TS

B3LYP SCF energy: -3293.92221196 a.u.

B3LYP enthalpy: -3292.824111 a.u.  
B3LYP free energy: -3292.978792 a.u.  
B3LYP-D3(BJ) SCF energy in solution: -3295.14177377 a.u.  
B3LYP-D3(BJ) enthalpy in solution: -3294.043673 a.u.  
B3LYP-D3(BJ) free energy in solution: -3294.198354 a.u.  
Imaginary frequency: -307.1495 cm-1

Cartesian coordinates

| ATOM | X         | Y         | Z         |
|------|-----------|-----------|-----------|
| C    | -6.598933 | 0.452746  | -0.136299 |
| C    | -5.297457 | 0.269372  | 0.275267  |
| C    | -4.376553 | -0.501981 | -0.493912 |
| C    | -4.856988 | -1.065119 | -1.718723 |
| C    | -6.207200 | -0.867665 | -2.114807 |
| C    | -7.066685 | -0.125400 | -1.340038 |
| H    | -7.274854 | 1.046763  | 0.472462  |
| H    | -4.970824 | 0.726071  | 1.201046  |
| C    | -3.001987 | -0.706638 | -0.091072 |
| C    | -3.958943 | -1.809367 | -2.516380 |
| H    | -6.544496 | -1.314221 | -3.046645 |
| H    | -8.098058 | 0.020905  | -1.647552 |
| C    | -2.647593 | -1.958460 | -2.145506 |
| C    | -2.129972 | -1.406555 | -0.935828 |
| H    | -4.314613 | -2.255657 | -3.441681 |
| H    | -1.996159 | -2.515253 | -2.802419 |
| C    | -2.627351 | -0.161331 | 1.258985  |
| C    | -3.228513 | -0.768847 | 2.423583  |
| C    | -1.823087 | 0.970998  | 1.412996  |
| C    | -4.068861 | -1.920266 | 2.349689  |
| C    | -2.991653 | -0.209087 | 3.721290  |
| C    | -1.634677 | 1.526414  | 2.710356  |
| C    | -4.615824 | -2.482412 | 3.481967  |
| H    | -4.283130 | -2.363555 | 1.384380  |
| C    | -3.573737 | -0.808799 | 4.871086  |
| C    | -2.196824 | 0.956648  | 3.824890  |
| H    | -1.055257 | 2.431246  | 2.828603  |
| C    | -4.368932 | -1.924489 | 4.759268  |
| H    | -5.250717 | -3.359304 | 3.391959  |
| H    | -3.378560 | -0.362946 | 5.843001  |
| H    | -2.043675 | 1.407548  | 4.802195  |
| H    | -4.811024 | -2.375672 | 5.642682  |
| P    | -0.278387 | -1.617466 | -0.654421 |
| P    | -0.868449 | 1.691487  | -0.012717 |
| C    | 0.290245  | -2.292039 | -2.300713 |
| C    | 0.827742  | -1.410719 | -3.253819 |
| C    | 0.156173  | -3.647546 | -2.652023 |

|   |           |           |           |
|---|-----------|-----------|-----------|
| C | 1.223305  | -1.864578 | -4.513901 |
| H | 0.952130  | -0.361492 | -2.996711 |
| C | 0.555116  | -4.102547 | -3.909831 |
| H | -0.268102 | -4.354338 | -1.947143 |
| C | 1.090119  | -3.213657 | -4.844776 |
| H | 1.639402  | -1.163806 | -5.232477 |
| H | 0.444094  | -5.154270 | -4.158376 |
| H | 1.400585  | -3.570639 | -5.822577 |
| C | -0.132273 | -3.123916 | 0.425580  |
| C | 0.999286  | -3.956150 | 0.341404  |
| C | -1.109498 | -3.431290 | 1.378856  |
| C | 1.144088  | -5.053558 | 1.190184  |
| H | 1.763366  | -3.767551 | -0.403352 |
| C | -0.961678 | -4.524879 | 2.234795  |
| H | -1.997794 | -2.824266 | 1.462292  |
| C | 0.166323  | -5.339084 | 2.146437  |
| H | 2.020418  | -5.689291 | 1.097944  |
| H | -1.738433 | -4.736426 | 2.964193  |
| H | 0.280663  | -6.193538 | 2.807258  |
| C | -0.374529 | 3.388753  | 0.566823  |
| C | 0.614260  | 3.511158  | 1.561635  |
| C | -0.929170 | 4.562892  | 0.036064  |
| C | 1.004596  | 4.763336  | 2.033853  |
| H | 1.084328  | 2.619884  | 1.965050  |
| C | -0.525705 | 5.818184  | 0.500601  |
| H | -1.677159 | 4.513092  | -0.745384 |
| C | 0.434548  | 5.924079  | 1.504739  |
| H | 1.757314  | 4.832249  | 2.814717  |
| H | -0.970747 | 6.712367  | 0.073320  |
| H | 0.739701  | 6.900174  | 1.871046  |
| C | -2.106486 | 2.058427  | -1.332589 |
| C | -3.328573 | 2.683396  | -1.033425 |
| C | -1.800101 | 1.776941  | -2.671093 |
| C | -4.213453 | 3.030815  | -2.053895 |
| H | -3.590597 | 2.900167  | -0.001939 |
| C | -2.686017 | 2.124849  | -3.692838 |
| H | -0.872275 | 1.266646  | -2.914037 |
| C | -3.892101 | 2.755875  | -3.385495 |
| H | -5.156700 | 3.509647  | -1.807899 |
| H | -2.435517 | 1.897192  | -4.725141 |
| H | -4.582874 | 3.027144  | -4.178672 |
| C | 5.258931  | 3.677676  | 0.549229  |
| C | 4.963592  | 2.567682  | 1.593849  |
| H | 6.231889  | 3.524996  | 0.069482  |
| H | 5.283966  | 4.669489  | 1.012903  |
| H | 5.779624  | 1.841129  | 1.668088  |

|    |          |           |           |
|----|----------|-----------|-----------|
| H  | 4.790423 | 2.978499  | 2.593370  |
| C  | 4.124249 | 3.548717  | -0.438309 |
| C  | 3.288969 | 2.474470  | -0.040373 |
| C  | 3.810859 | 4.261712  | -1.566647 |
| H  | 4.429446 | 5.089225  | -1.902590 |
| C  | 2.647777 | 3.891373  | -2.282287 |
| H  | 2.344416 | 4.423741  | -3.176451 |
| C  | 1.892638 | 2.831437  | -1.832800 |
| H  | 1.001835 | 2.520674  | -2.363836 |
| N  | 2.195101 | 2.089945  | -0.723187 |
| N  | 3.738866 | 1.892574  | 1.108656  |
| C  | 3.167068 | 0.802957  | 1.773356  |
| C  | 2.296811 | -0.111499 | 1.241277  |
| C  | 3.368788 | 0.645106  | 3.269443  |
| H  | 4.415088 | 0.752142  | 3.582457  |
| H  | 2.798844 | 1.405119  | 3.830538  |
| C  | 2.822192 | -0.773223 | 3.525504  |
| H  | 3.639744 | -1.498580 | 3.447554  |
| H  | 2.375781 | -0.882100 | 4.518562  |
| C  | 1.807397 | -1.003942 | 2.385523  |
| H  | 1.702510 | -2.056753 | 2.122433  |
| H  | 0.806637 | -0.666500 | 2.685096  |
| Ir | 1.003212 | 0.338328  | -0.329874 |
| C  | 3.141719 | -1.072881 | -0.471079 |
| H  | 2.466678 | -1.643358 | -1.106471 |
| C  | 4.062552 | -0.231237 | -1.346111 |
| H  | 3.527630 | 0.428824  | -2.029149 |
| H  | 4.667127 | -0.908027 | -1.963964 |
| C  | 3.947274 | -2.063962 | 0.384645  |
| H  | 3.299033 | -2.591175 | 1.086549  |
| H  | 4.680484 | -1.512640 | 0.985697  |
| C  | 4.685633 | -3.135199 | -0.449553 |
| H  | 5.451240 | -2.669858 | -1.082293 |
| H  | 3.982294 | -3.628429 | -1.137523 |
| C  | 5.356786 | -4.196179 | 0.435585  |
| H  | 4.594015 | -4.685210 | 1.058465  |
| H  | 6.045116 | -3.700104 | 1.134073  |
| C  | 6.119003 | -5.254375 | -0.369150 |
| H  | 6.918594 | -4.799381 | -0.965892 |
| H  | 6.578990 | -5.998939 | 0.289706  |
| H  | 5.452496 | -5.786168 | -1.059223 |
| H  | 4.762994 | 0.362501  | -0.751537 |

15L-TS

B3LYP SCF energy: -3293.95426891 a.u.  
B3LYP enthalpy: -3292.859829 a.u.  
B3LYP free energy: -3293.013070 a.u.  
B3LYP-D3(BJ) SCF energy in solution: -3295.17308766 a.u.  
B3LYP-D3(BJ) enthalpy in solution: -3294.078648 a.u.  
B3LYP-D3(BJ) free energy in solution: -3294.231889 a.u.  
Imaginary frequency: -747.9765 cm-1

Cartesian coordinates

| ATOM | X         | Y         | Z         |
|------|-----------|-----------|-----------|
| C    | 6.092447  | -0.775845 | -2.288482 |
| C    | 4.966693  | -0.792027 | -1.494679 |
| C    | 4.203721  | 0.390640  | -1.262421 |
| C    | 4.659058  | 1.594857  | -1.886876 |
| C    | 5.830163  | 1.585980  | -2.690606 |
| C    | 6.536915  | 0.424001  | -2.891446 |
| H    | 6.647907  | -1.695586 | -2.448729 |
| H    | 4.657725  | -1.727321 | -1.045476 |
| C    | 3.005932  | 0.400508  | -0.443843 |
| C    | 3.928893  | 2.785065  | -1.666097 |
| H    | 6.154149  | 2.518588  | -3.145300 |
| H    | 7.431301  | 0.423217  | -3.507656 |
| C    | 2.767109  | 2.767743  | -0.940395 |
| C    | 2.250402  | 1.571485  | -0.349831 |
| H    | 4.292602  | 3.719261  | -2.086347 |
| H    | 2.241609  | 3.701084  | -0.801627 |
| C    | 2.769396  | -0.882776 | 0.304964  |
| C    | 3.717653  | -1.198854 | 1.343638  |
| C    | 1.843513  | -1.848749 | -0.095360 |
| C    | 4.606990  | -0.227247 | 1.887506  |
| C    | 3.789137  | -2.533205 | 1.862058  |
| C    | 1.974935  | -3.180676 | 0.390512  |
| C    | 5.493487  | -0.554639 | 2.888551  |
| H    | 4.573311  | 0.790039  | 1.515882  |
| C    | 4.726543  | -2.844256 | 2.883847  |
| C    | 2.933220  | -3.518770 | 1.314867  |
| H    | 1.311736  | -3.951329 | 0.021444  |
| C    | 5.560884  | -1.876509 | 3.391436  |
| H    | 6.150993  | 0.208104  | 3.295808  |
| H    | 4.767204  | -3.863662 | 3.258918  |
| H    | 3.025207  | -4.548212 | 1.651996  |
| H    | 6.271462  | -2.120946 | 4.175589  |
| P    | 0.599898  | 1.722136  | 0.527944  |
| P    | 0.329705  | -1.376373 | -1.061380 |
| C    | 0.018333  | 3.375236  | -0.108687 |
| C    | -0.139972 | 3.571885  | -1.494966 |

|   |           |           |           |
|---|-----------|-----------|-----------|
| C | -0.315451 | 4.424678  | 0.757217  |
| C | -0.614332 | 4.782661  | -1.994141 |
| H | 0.122591  | 2.777881  | -2.187495 |
| C | -0.804545 | 5.636360  | 0.254349  |
| H | -0.192611 | 4.311446  | 1.828384  |
| C | -0.954286 | 5.819999  | -1.118351 |
| H | -0.717231 | 4.918824  | -3.067201 |
| H | -1.059636 | 6.435880  | 0.944038  |
| H | -1.326364 | 6.763343  | -1.507534 |
| C | 1.069248  | 2.160586  | 2.266393  |
| C | 0.157210  | 1.988891  | 3.319737  |
| C | 2.300943  | 2.780814  | 2.532992  |
| C | 0.468256  | 2.433050  | 4.606240  |
| H | -0.782978 | 1.480114  | 3.141455  |
| C | 2.612034  | 3.216285  | 3.821884  |
| H | 3.018871  | 2.935176  | 1.734600  |
| C | 1.695822  | 3.047042  | 4.861089  |
| H | -0.248318 | 2.291037  | 5.410481  |
| H | 3.570622  | 3.691242  | 4.010761  |
| H | 1.937872  | 3.389107  | 5.863275  |
| C | -0.476011 | -3.005995 | -1.431859 |
| C | -1.080004 | -3.726278 | -0.383511 |
| C | -0.523341 | -3.541169 | -2.727348 |
| C | -1.695273 | -4.952977 | -0.625891 |
| H | -1.068184 | -3.320304 | 0.623537  |
| C | -1.151735 | -4.766610 | -2.968882 |
| H | -0.070191 | -3.011023 | -3.556868 |
| C | -1.735955 | -5.476530 | -1.921514 |
| H | -2.146194 | -5.500516 | 0.197356  |
| H | -1.176741 | -5.163944 | -3.979703 |
| H | -2.218682 | -6.431341 | -2.109786 |
| C | 0.943967  | -0.848363 | -2.721375 |
| C | 2.065841  | -1.471677 | -3.291897 |
| C | 0.250673  | 0.111247  | -3.471698 |
| C | 2.485564  | -1.136129 | -4.579183 |
| H | 2.614344  | -2.221102 | -2.730114 |
| C | 0.667594  | 0.442853  | -4.762832 |
| H | -0.615247 | 0.602946  | -3.038045 |
| C | 1.787107  | -0.178639 | -5.318168 |
| H | 3.360870  | -1.620846 | -5.001698 |
| H | 0.118629  | 1.187856  | -5.332418 |
| H | 2.114782  | 0.081654  | -6.320585 |
| C | -5.520038 | -2.496629 | 1.887881  |
| C | -4.365140 | -2.259452 | 2.896273  |
| H | -6.352193 | -1.806772 | 2.072203  |
| H | -5.923072 | -3.511459 | 1.961137  |

|    |           |           |           |
|----|-----------|-----------|-----------|
| H  | -4.656100 | -1.593442 | 3.713699  |
| H  | -4.017464 | -3.199382 | 3.337350  |
| C  | -4.877555 | -2.217026 | 0.551696  |
| C  | -3.595726 | -1.651724 | 0.779279  |
| C  | -5.305674 | -2.416035 | -0.736435 |
| H  | -6.270489 | -2.869679 | -0.946251 |
| C  | -4.447071 | -2.023519 | -1.789871 |
| H  | -4.726322 | -2.170194 | -2.826891 |
| C  | -3.250184 | -1.414988 | -1.487682 |
| H  | -2.590150 | -1.063959 | -2.269352 |
| N  | -2.812455 | -1.184482 | -0.212476 |
| N  | -3.273715 | -1.648843 | 2.103163  |
| C  | -1.963824 | -1.498760 | 2.619213  |
| C  | -0.914301 | -0.912677 | 1.995393  |
| C  | -1.621414 | -2.163739 | 3.944044  |
| H  | -2.344363 | -1.956781 | 4.742720  |
| H  | -1.577019 | -3.260642 | 3.838716  |
| C  | -0.230336 | -1.573277 | 4.236471  |
| H  | -0.340276 | -0.661903 | 4.836495  |
| H  | 0.416329  | -2.259098 | 4.793045  |
| C  | 0.321821  | -1.212243 | 2.842392  |
| H  | 1.046287  | -0.397590 | 2.884471  |
| H  | 0.855475  | -2.072298 | 2.420644  |
| Ir | -1.123106 | 0.122470  | 0.149265  |
| H  | -1.633507 | 0.972885  | -1.257004 |
| C  | -2.610140 | 1.492657  | 1.026247  |
| H  | -2.155106 | 2.220275  | 1.691232  |
| C  | -2.736921 | 1.853874  | -0.353081 |
| H  | -2.215518 | 2.753764  | -0.653059 |
| H  | -3.421211 | 0.932837  | 1.486002  |
| C  | -4.014636 | 1.635122  | -1.137808 |
| H  | -3.801606 | 1.504932  | -2.205973 |
| H  | -4.539478 | 0.739481  | -0.796685 |
| C  | -4.936422 | 2.861030  | -0.956981 |
| H  | -5.158158 | 2.994714  | 0.110770  |
| H  | -4.407019 | 3.768925  | -1.278884 |
| C  | -6.249686 | 2.731530  | -1.741504 |
| H  | -6.021884 | 2.594072  | -2.807840 |
| H  | -6.775220 | 1.821127  | -1.420641 |
| C  | -7.170046 | 3.943905  | -1.565681 |
| H  | -8.096647 | 3.823420  | -2.137172 |
| H  | -7.443553 | 4.086083  | -0.513231 |
| H  | -6.683756 | 4.864643  | -1.909806 |



**16L**

B3LYP SCF energy: -3293.98321495 a.u.

B3LYP enthalpy: -3292.883842 a.u.

B3LYP free energy: -3293.040601 a.u.

B3LYP-D3(BJ) SCF energy in solution: -3295.20571419 a.u.

B3LYP-D3(BJ) enthalpy in solution: -3294.106341 a.u.

B3LYP-D3(BJ) free energy in solution: -3294.263100 a.u.

## Cartesian coordinates

| ATOM | X         | Y         | Z         |
|------|-----------|-----------|-----------|
| C    | -6.423509 | 0.113556  | 1.791386  |
| C    | -5.257616 | -0.035644 | 1.072717  |
| C    | -4.237145 | 0.960839  | 1.096164  |
| C    | -4.475806 | 2.123848  | 1.896385  |
| C    | -5.691541 | 2.256029  | 2.619122  |
| C    | -6.650456 | 1.271786  | 2.571041  |
| H    | -7.179737 | -0.665401 | 1.753440  |
| H    | -5.118433 | -0.931261 | 0.480447  |
| C    | -2.995674 | 0.826226  | 0.358926  |
| C    | -3.485490 | 3.133251  | 1.939694  |
| H    | -5.846577 | 3.152955  | 3.213204  |
| H    | -7.577991 | 1.379694  | 3.125700  |
| C    | -2.299442 | 2.975641  | 1.272930  |
| C    | -2.015751 | 1.812784  | 0.489862  |
| H    | -3.670784 | 4.035739  | 2.516524  |
| H    | -1.561833 | 3.764292  | 1.339156  |
| C    | -2.944978 | -0.370732 | -0.555720 |
| C    | -3.805544 | -0.332304 | -1.710456 |
| C    | -2.288396 | -1.563312 | -0.230914 |
| C    | -4.418527 | 0.871620  | -2.165015 |
| C    | -4.072118 | -1.535437 | -2.444119 |
| C    | -2.605144 | -2.752883 | -0.946374 |
| C    | -5.229121 | 0.881861  | -3.277579 |
| H    | -4.229515 | 1.796682  | -1.633082 |
| C    | -4.926843 | -1.494893 | -3.578888 |
| C    | -3.488496 | -2.745863 | -1.998725 |
| H    | -2.143403 | -3.687578 | -0.654130 |
| C    | -5.493583 | -0.312138 | -3.991473 |
| H    | -5.673703 | 1.815282  | -3.610720 |
| H    | -5.120535 | -2.419487 | -4.116678 |
| H    | -3.730728 | -3.672379 | -2.513339 |
| H    | -6.142739 | -0.289028 | -4.861864 |
| P    | -0.322738 | 1.756813  | -0.294812 |
| P    | -0.815747 | -1.576211 | 0.895060  |
| C    | 0.613239  | 2.952024  | 0.771173  |
| C    | 0.737725  | 2.677595  | 2.145707  |

|   |           |           |           |
|---|-----------|-----------|-----------|
| C | 1.262198  | 4.076113  | 0.243978  |
| C | 1.491934  | 3.511430  | 2.971231  |
| H | 0.207379  | 1.836683  | 2.583051  |
| C | 2.021744  | 4.906506  | 1.073281  |
| H | 1.173199  | 4.313707  | -0.810608 |
| C | 2.140409  | 4.627182  | 2.435334  |
| H | 1.566481  | 3.294320  | 4.033229  |
| H | 2.514164  | 5.777782  | 0.650816  |
| H | 2.726029  | 5.278852  | 3.077254  |
| C | -0.529993 | 2.662495  | -1.894008 |
| C | 0.369980  | 2.465004  | -2.954604 |
| C | -1.553801 | 3.613220  | -2.043859 |
| C | 0.250988  | 3.206244  | -4.131464 |
| H | 1.158293  | 1.726722  | -2.869178 |
| C | -1.671677 | 4.348390  | -3.224066 |
| H | -2.261377 | 3.787525  | -1.240354 |
| C | -0.769098 | 4.148838  | -4.269895 |
| H | 0.956203  | 3.041837  | -4.941315 |
| H | -2.470205 | 5.078199  | -3.323176 |
| H | -0.861484 | 4.722856  | -5.187443 |
| C | -0.363659 | -3.364722 | 1.069273  |
| C | 0.301023  | -4.004631 | 0.006572  |
| C | -0.631582 | -4.100379 | 2.233766  |
| C | 0.668755  | -5.346312 | 0.102427  |
| H | 0.524163  | -3.451033 | -0.900231 |
| C | -0.248644 | -5.440676 | 2.331942  |
| H | -1.141254 | -3.634920 | 3.069580  |
| C | 0.398989  | -6.067975 | 1.268242  |
| H | 1.170100  | -5.827948 | -0.732792 |
| H | -0.464523 | -5.993055 | 3.242174  |
| H | 0.691177  | -7.111432 | 1.344819  |
| C | -1.420109 | -1.158903 | 2.585605  |
| C | -2.724466 | -1.460338 | 3.004817  |
| C | -0.526964 | -0.598640 | 3.512093  |
| C | -3.126499 | -1.195438 | 4.314860  |
| H | -3.429270 | -1.900749 | 2.307380  |
| C | -0.924937 | -0.341492 | 4.825198  |
| H | 0.491208  | -0.365587 | 3.210780  |
| C | -2.228878 | -0.637160 | 5.227297  |
| H | -4.142968 | -1.425574 | 4.620640  |
| H | -0.219492 | 0.088795  | 5.530586  |
| H | -2.543614 | -0.434355 | 6.246887  |
| C | 5.010696  | -3.479866 | -1.601060 |
| C | 4.119771  | -2.806990 | -2.680848 |
| H | 6.064103  | -3.211270 | -1.724063 |
| H | 4.947841  | -4.573118 | -1.659573 |

|    |           |           |           |
|----|-----------|-----------|-----------|
| H  | 4.657870  | -2.015424 | -3.217242 |
| H  | 3.749066  | -3.522310 | -3.418231 |
| C  | 4.429694  | -2.975347 | -0.301116 |
| C  | 3.254572  | -2.239510 | -0.590585 |
| C  | 4.803128  | -3.149291 | 1.008132  |
| H  | 5.690580  | -3.717714 | 1.271786  |
| C  | 3.988412  | -2.578309 | 2.014455  |
| H  | 4.230235  | -2.693663 | 3.064699  |
| C  | 2.873456  | -1.858442 | 1.646655  |
| H  | 2.235926  | -1.400623 | 2.394051  |
| N  | 2.498266  | -1.651506 | 0.350210  |
| N  | 2.991223  | -2.218018 | -1.927812 |
| C  | 1.838365  | -1.698047 | -2.533773 |
| C  | 0.884522  | -0.924113 | -1.958461 |
| C  | 1.477222  | -2.123469 | -3.946350 |
| H  | 2.309816  | -2.032064 | -4.654021 |
| H  | 1.155725  | -3.177503 | -3.969857 |
| C  | 0.314490  | -1.168700 | -4.284402 |
| H  | 0.712227  | -0.267428 | -4.765420 |
| H  | -0.416642 | -1.614163 | -4.965756 |
| C  | -0.293352 | -0.797299 | -2.914369 |
| H  | -0.762600 | 0.187220  | -2.921223 |
| H  | -1.074688 | -1.514197 | -2.640196 |
| Ir | 1.022107  | -0.167694 | -0.093095 |
| C  | 2.720364  | 0.969973  | -0.756149 |
| H  | 2.423032  | 1.920189  | -1.209284 |
| C  | 3.719046  | 1.275774  | 0.372698  |
| H  | 3.213824  | 1.772000  | 1.212276  |
| H  | 3.224208  | 0.400496  | -1.546933 |
| C  | 4.880940  | 2.176884  | -0.092186 |
| H  | 5.388277  | 1.700090  | -0.944235 |
| H  | 4.474336  | 3.126031  | -0.468906 |
| C  | 5.904471  | 2.464497  | 1.014161  |
| H  | 5.394375  | 2.943773  | 1.863180  |
| H  | 6.303359  | 1.512702  | 1.396638  |
| C  | 7.070818  | 3.352514  | 0.558443  |
| H  | 7.575489  | 2.876784  | -0.294467 |
| H  | 6.674130  | 4.306294  | 0.182348  |
| C  | 8.091463  | 3.625256  | 1.668273  |
| H  | 8.911379  | 4.257789  | 1.310363  |
| H  | 7.625447  | 4.135315  | 2.520430  |
| H  | 8.529988  | 2.691640  | 2.041814  |
| H  | 4.145605  | 0.348375  | 0.774587  |

## 17L-TS

B3LYP SCF energy: -3293.94145785 a.u.  
B3LYP enthalpy: -3292.843686 a.u.  
B3LYP free energy: -3292.999143 a.u.  
B3LYP-D3(BJ) SCF energy in solution: -3295.15329405 a.u.  
B3LYP-D3(BJ) enthalpy in solution: -3294.055522 a.u.  
B3LYP-D3(BJ) free energy in solution: -3294.210979 a.u.  
Imaginary frequency: -421.4516 cm<sup>-1</sup>

### Cartesian coordinates

| ATOM | X         | Y         | Z         |
|------|-----------|-----------|-----------|
| C    | -6.681398 | 0.630477  | -0.600033 |
| C    | -5.414923 | 0.454032  | -0.087983 |
| C    | -4.493086 | -0.456997 | -0.683800 |
| C    | -4.933306 | -1.169974 | -1.843908 |
| C    | -6.247943 | -0.974557 | -2.345930 |
| C    | -7.110437 | -0.093858 | -1.737231 |
| H    | -7.359318 | 1.332686  | -0.122973 |
| H    | -5.117067 | 1.024604  | 0.782609  |
| C    | -3.153251 | -0.656947 | -0.174319 |
| C    | -4.031583 | -2.058124 | -2.472695 |
| H    | -6.556263 | -1.535513 | -3.224422 |
| H    | -8.114788 | 0.049776  | -2.124986 |
| C    | -2.752505 | -2.208577 | -2.004120 |
| C    | -2.275407 | -1.510173 | -0.854615 |
| H    | -4.357842 | -2.615471 | -3.347165 |
| H    | -2.094555 | -2.879432 | -2.536388 |
| C    | -2.827464 | 0.072306  | 1.099546  |
| C    | -3.507519 | -0.343132 | 2.303599  |
| C    | -2.005398 | 1.202292  | 1.129365  |
| C    | -4.372160 | -1.477680 | 2.351157  |
| C    | -3.332713 | 0.403084  | 3.514522  |
| C    | -1.887193 | 1.950531  | 2.334498  |
| C    | -4.994906 | -1.855891 | 3.520130  |
| H    | -4.546755 | -2.053669 | 1.449918  |
| C    | -3.991895 | -0.009476 | 4.704410  |
| C    | -2.525311 | 1.564642  | 3.486587  |
| H    | -1.297270 | 2.856378  | 2.348145  |
| C    | -4.804991 | -1.117918 | 4.713040  |
| H    | -5.646575 | -2.725050 | 3.523681  |
| H    | -3.842473 | 0.574771  | 5.608807  |
| H    | -2.423369 | 2.160101  | 4.390482  |
| H    | -5.306166 | -1.425133 | 5.626207  |
| P    | -0.459917 | -1.755463 | -0.428849 |
| P    | -0.904951 | 1.648223  | -0.305691 |
| C    | 0.192992  | -2.616613 | -1.951494 |

|   |           |           |           |
|---|-----------|-----------|-----------|
| C | 0.854514  | -1.871711 | -2.941332 |
| C | 0.012917  | -3.994691 | -2.170802 |
| C | 1.328311  | -2.477970 | -4.106974 |
| H | 1.016730  | -0.808780 | -2.787338 |
| C | 0.489103  | -4.602527 | -3.333350 |
| H | -0.505180 | -4.600247 | -1.435076 |
| C | 1.149520  | -3.847251 | -4.304748 |
| H | 1.841099  | -1.879592 | -4.854999 |
| H | 0.341720  | -5.669030 | -3.478223 |
| H | 1.521384  | -4.323274 | -5.207506 |
| C | -0.432081 | -3.143603 | 0.804769  |
| C | 0.671349  | -4.015915 | 0.877354  |
| C | -1.469642 | -3.306640 | 1.730204  |
| C | 0.730519  | -5.010009 | 1.854127  |
| H | 1.478986  | -3.941219 | 0.158159  |
| C | -1.407738 | -4.299248 | 2.710604  |
| H | -2.335559 | -2.661376 | 1.696196  |
| C | -0.306619 | -5.151875 | 2.779384  |
| H | 1.586843  | -5.677943 | 1.886781  |
| H | -2.227749 | -4.401948 | 3.415649  |
| H | -0.258992 | -5.926471 | 3.539385  |
| C | -0.383371 | 3.406379  | 0.008093  |
| C | 0.503875  | 3.686630  | 1.064520  |
| C | -0.814453 | 4.473730  | -0.794780 |
| C | 0.913758  | 4.992579  | 1.329628  |
| H | 0.878828  | 2.877885  | 1.682931  |
| C | -0.390007 | 5.780321  | -0.536844 |
| H | -1.483202 | 4.298991  | -1.628438 |
| C | 0.467804  | 6.046648  | 0.528538  |
| H | 1.585556  | 5.185914  | 2.161753  |
| H | -0.738651 | 6.588851  | -1.173197 |
| H | 0.789180  | 7.064010  | 0.732863  |
| C | -2.001407 | 1.825968  | -1.778923 |
| C | -3.232979 | 2.496927  | -1.697512 |
| C | -1.565047 | 1.362949  | -3.027740 |
| C | -4.004557 | 2.700706  | -2.841082 |
| H | -3.590727 | 2.862767  | -0.739603 |
| C | -2.336381 | 1.568810  | -4.173488 |
| H | -0.623760 | 0.826287  | -3.105086 |
| C | -3.556733 | 2.239216  | -4.081528 |
| H | -4.957827 | 3.214995  | -2.761743 |
| H | -1.985765 | 1.200636  | -5.133582 |
| H | -4.159195 | 2.398984  | -4.971157 |
| C | 5.145565  | 3.396214  | 1.001316  |
| C | 4.648108  | 2.397437  | 2.078642  |
| H | 6.205716  | 3.247893  | 0.773737  |

|    |          |           |           |
|----|----------|-----------|-----------|
| H  | 5.031114 | 4.433421  | 1.337385  |
| H  | 5.382937 | 1.606962  | 2.272582  |
| H  | 4.423163 | 2.887526  | 3.029070  |
| C  | 4.251848 | 3.112264  | -0.181086 |
| C  | 3.265112 | 2.171830  | 0.208295  |
| C  | 4.224893 | 3.626376  | -1.452601 |
| H  | 4.965358 | 4.348437  | -1.785142 |
| C  | 3.191127 | 3.201207  | -2.319954 |
| H  | 3.113997 | 3.582610  | -3.331615 |
| C  | 2.268178 | 2.286696  | -1.864604 |
| H  | 1.463352 | 1.938562  | -2.500451 |
| N  | 2.291934 | 1.738001  | -0.612207 |
| N  | 3.418391 | 1.795008  | 1.512419  |
| C  | 2.688767 | 0.816194  | 2.195589  |
| C  | 1.870589 | -0.132092 | 1.642542  |
| C  | 2.675742 | 0.801500  | 3.712014  |
| H  | 3.668486 | 0.936449  | 4.158619  |
| H  | 2.041664 | 1.609584  | 4.112726  |
| C  | 2.084523 | -0.589079 | 4.017670  |
| H  | 2.900978 | -1.313780 | 4.119079  |
| H  | 1.506669 | -0.610097 | 4.946382  |
| C  | 1.235142 | -0.935568 | 2.774916  |
| H  | 1.212188 | -2.009013 | 2.579291  |
| H  | 0.193222 | -0.618324 | 2.908070  |
| Ir | 0.902524 | 0.166034  | -0.179206 |
| C  | 2.735831 | -1.234438 | 0.213351  |
| C  | 4.225155 | -0.904448 | 0.136475  |
| H  | 4.404795 | -0.078784 | -0.561979 |
| C  | 5.036157 | -2.128730 | -0.332358 |
| H  | 4.860084 | -2.965173 | 0.359795  |
| H  | 4.669948 | -2.460197 | -1.314798 |
| C  | 6.544395 | -1.855356 | -0.419958 |
| H  | 6.724244 | -1.026450 | -1.120910 |
| H  | 6.909529 | -1.512372 | 0.559767  |
| C  | 7.359586 | -3.078066 | -0.862315 |
| H  | 7.179367 | -3.904616 | -0.160562 |
| H  | 6.992598 | -3.422762 | -1.839464 |
| C  | 8.864084 | -2.801234 | -0.949742 |
| H  | 9.414544 | -3.693157 | -1.268421 |
| H  | 9.080233 | -2.002244 | -1.669584 |
| H  | 9.268148 | -2.490871 | 0.021651  |
| H  | 4.600835 | -0.590644 | 1.117143  |
| H  | 2.409730 | -1.501247 | -0.806183 |
| H  | 2.561849 | -2.117752 | 0.825430  |

**18**

B3LYP SCF energy: -575.18734061 a.u.  
B3LYP enthalpy: -574.935109 a.u.  
B3LYP free energy: -574.986894 a.u.  
B3LYP-D3(BJ) SCF energy in solution: -575.41708279 a.u.  
B3LYP-D3(BJ) enthalpy in solution: -575.164851 a.u.  
B3LYP-D3(BJ) free energy in solution: -575.216636 a.u.

## Cartesian coordinates

| ATOM | X         | Y         | Z         |
|------|-----------|-----------|-----------|
| C    | -1.575346 | 2.178057  | 0.076806  |
| C    | -0.047886 | 2.011787  | -0.142172 |
| H    | -2.021596 | 2.833171  | -0.678640 |
| H    | -1.784713 | 2.627056  | 1.056635  |
| H    | 0.240411  | 2.316903  | -1.157767 |
| H    | 0.535066  | 2.609657  | 0.562889  |
| C    | -2.082647 | 0.759120  | 0.014933  |
| C    | -0.983679 | -0.129891 | 0.030615  |
| C    | -3.354587 | 0.227597  | -0.008777 |
| H    | -4.232665 | 0.869342  | -0.021469 |
| C    | -3.486433 | -1.174998 | -0.014305 |
| H    | -4.464100 | -1.645472 | -0.036257 |
| C    | -2.334400 | -1.951024 | 0.013654  |
| H    | -2.406677 | -3.037325 | 0.017065  |
| N    | -1.079622 | -1.457706 | 0.034797  |
| N    | 0.216027  | 0.572241  | 0.048678  |
| C    | 1.507572  | 0.037960  | -0.001048 |
| C    | 1.886141  | -1.255332 | -0.025769 |
| H    | 1.203013  | -2.091987 | -0.026219 |
| C    | 2.703834  | 0.975298  | -0.069128 |
| H    | 2.774495  | 1.444333  | -1.062692 |
| H    | 2.654137  | 1.794793  | 0.658313  |
| C    | 3.899175  | 0.033461  | 0.207330  |
| H    | 4.792389  | 0.311990  | -0.361069 |
| H    | 4.159111  | 0.088296  | 1.270551  |
| C    | 3.386335  | -1.390849 | -0.122048 |
| H    | 3.692749  | -1.707129 | -1.132709 |
| H    | 3.795085  | -2.142492 | 0.566493  |

**19**

B3LYP SCF energy: -3058.11779916 a.u.  
B3LYP enthalpy: -3057.199434 a.u.  
B3LYP free energy: -3057.335655 a.u.

B3LYP-D3(BJ) SCF energy in solution: -3059.21885586 a.u.  
B3LYP-D3(BJ) enthalpy in solution: -3058.300491 a.u.  
B3LYP-D3(BJ) free energy in solution: -3058.436712 a.u.

Cartesian coordinates

| ATOM | X         | Y         | Z         |
|------|-----------|-----------|-----------|
| C    | 5.685499  | 2.591603  | 0.106949  |
| C    | 4.573897  | 1.878135  | -0.282698 |
| C    | 3.917985  | 0.979423  | 0.609583  |
| C    | 4.447801  | 0.865942  | 1.936061  |
| C    | 5.597825  | 1.613152  | 2.308852  |
| C    | 6.211109  | 2.457148  | 1.413847  |
| H    | 6.164568  | 3.265207  | -0.598056 |
| H    | 4.193263  | 2.005879  | -1.288282 |
| C    | 2.752780  | 0.212149  | 0.231143  |
| C    | 3.802922  | 0.008849  | 2.857466  |
| H    | 5.982223  | 1.502336  | 3.319502  |
| H    | 7.092096  | 3.021703  | 1.705029  |
| C    | 2.686769  | -0.700508 | 2.493916  |
| C    | 2.142038  | -0.619042 | 1.180269  |
| H    | 4.199662  | -0.080335 | 3.865585  |
| H    | 2.212105  | -1.337041 | 3.228519  |
| C    | 2.277369  | 0.356772  | -1.191263 |
| C    | 3.111830  | -0.152646 | -2.251023 |
| C    | 1.108893  | 1.055573  | -1.522912 |
| C    | 4.324665  | -0.863688 | -2.006325 |
| C    | 2.739041  | 0.064223  | -3.619399 |
| C    | 0.775216  | 1.280752  | -2.887451 |
| C    | 5.097547  | -1.340414 | -3.040789 |
| H    | 4.652468  | -1.021883 | -0.985767 |
| C    | 3.558519  | -0.440140 | -4.665929 |
| C    | 1.566161  | 0.802849  | -3.902302 |
| H    | -0.109732 | 1.852746  | -3.135012 |
| C    | 4.713326  | -1.131250 | -4.387481 |
| H    | 6.016590  | -1.876559 | -2.821668 |
| H    | 3.253070  | -0.263413 | -5.693942 |
| H    | 1.298584  | 0.994247  | -4.938346 |
| H    | 5.334153  | -1.511632 | -5.193255 |
| P    | 0.555097  | -1.549307 | 0.879646  |
| P    | -0.106864 | 1.586382  | -0.232148 |
| C    | 0.224390  | -2.470400 | 2.470008  |
| C    | -0.803807 | -2.094525 | 3.347578  |
| C    | 1.000338  | -3.600128 | 2.793505  |
| C    | -1.053800 | -2.827310 | 4.511310  |
| H    | -1.409548 | -1.224010 | 3.122910  |
| C    | 0.759390  | -4.320027 | 3.962364  |



|   |           |           |           |
|---|-----------|-----------|-----------|
| H | 1.797165  | -3.922501 | 2.131314  |
| C | -0.272776 | -3.938776 | 4.823773  |
| H | -1.860653 | -2.522828 | 5.172197  |
| H | 1.374522  | -5.184547 | 4.195539  |
| H | -0.465060 | -4.506331 | 5.729862  |
| C | 0.974334  | -3.013319 | -0.168642 |
| C | -0.028486 | -3.979634 | -0.370118 |
| C | 2.255410  | -3.253696 | -0.673284 |
| C | 0.246711  | -5.147533 | -1.076490 |
| H | -1.026750 | -3.815315 | 0.026044  |
| C | 2.528505  | -4.423026 | -1.390375 |
| H | 3.050274  | -2.540332 | -0.501365 |
| C | 1.527071  | -5.370124 | -1.594656 |
| H | -0.536260 | -5.886704 | -1.221321 |
| H | 3.528312  | -4.588850 | -1.781266 |
| H | 1.740515  | -6.280781 | -2.147041 |
| C | -1.280013 | 2.773995  | -1.043422 |
| C | -2.247901 | 2.293547  | -1.946028 |
| C | -1.258578 | 4.147963  | -0.753923 |
| C | -3.142210 | 3.166926  | -2.562331 |
| H | -2.307170 | 1.230098  | -2.152746 |
| C | -2.166655 | 5.017660  | -1.363861 |
| H | -0.538916 | 4.552141  | -0.053280 |
| C | -3.105746 | 4.533627  | -2.272688 |
| H | -3.872987 | 2.778123  | -3.266323 |
| H | -2.133050 | 6.076492  | -1.123680 |
| H | -3.807261 | 5.212645  | -2.748918 |
| C | 0.840474  | 2.662569  | 0.926816  |
| C | 1.745100  | 3.594836  | 0.387358  |
| C | 0.617546  | 2.657331  | 2.309446  |
| C | 2.400621  | 4.505530  | 1.214792  |
| H | 1.936948  | 3.613715  | -0.681385 |
| C | 1.280275  | 3.566461  | 3.136690  |
| H | -0.061406 | 1.929177  | 2.739780  |
| C | 2.168844  | 4.494012  | 2.592155  |
| H | 3.098166  | 5.217164  | 0.783161  |
| H | 1.101739  | 3.545140  | 4.208066  |
| H | 2.682496  | 5.201664  | 3.236575  |
| C | -6.705468 | -0.074480 | -0.315495 |
| C | -5.862794 | -1.099688 | -1.108702 |
| H | -7.499785 | -0.560824 | 0.258526  |
| H | -7.186831 | 0.647784  | -0.985785 |
| H | -6.040822 | -2.126425 | -0.768082 |
| H | -6.056134 | -1.059654 | -2.181918 |
| C | -5.686500 | 0.603551  | 0.564848  |
| C | -4.386694 | 0.172453  | 0.189253  |

|    |           |           |           |
|----|-----------|-----------|-----------|
| C  | -5.828774 | 1.533734  | 1.560937  |
| H  | -6.808252 | 1.889985  | 1.866743  |
| C  | -4.652806 | 2.026763  | 2.172001  |
| H  | -4.700767 | 2.766245  | 2.963477  |
| C  | -3.428329 | 1.555490  | 1.764202  |
| H  | -2.513580 | 1.906039  | 2.219731  |
| N  | -3.255240 | 0.605329  | 0.784230  |
| N  | -4.450086 | -0.736781 | -0.833940 |
| C  | -3.390465 | -1.315433 | -1.515519 |
| C  | -2.049141 | -1.170907 | -1.237668 |
| C  | -3.688028 | -2.107153 | -2.780504 |
| H  | -4.474276 | -2.860399 | -2.652951 |
| H  | -4.030023 | -1.429731 | -3.580135 |
| C  | -2.317435 | -2.723220 | -3.113874 |
| H  | -2.244123 | -3.721023 | -2.665021 |
| H  | -2.154280 | -2.833585 | -4.190354 |
| C  | -1.311391 | -1.776064 | -2.430933 |
| H  | -0.375644 | -2.271439 | -2.173988 |
| H  | -1.036104 | -0.954834 | -3.112445 |
| Ir | -1.289335 | -0.207122 | 0.444467  |
| H  | -0.921333 | 0.365566  | 1.947114  |

## 20

B3LYP SCF energy: -3293.96292966 a.u.

B3LYP enthalpy: -3292.865817 a.u.

B3LYP free energy: -3293.019238 a.u.

B3LYP-D3(BJ) SCF energy in solution: -3295.18110259 a.u.

B3LYP-D3(BJ) enthalpy in solution: -3294.083990 a.u.

B3LYP-D3(BJ) free energy in solution: -3294.237411 a.u.

### Cartesian coordinates

| ATOM | X        | Y         | Z         |
|------|----------|-----------|-----------|
| C    | 6.079579 | -1.066490 | -2.176409 |
| C    | 4.973141 | -0.957465 | -1.363277 |
| C    | 4.170229 | 0.221726  | -1.353909 |
| C    | 4.559634 | 1.283626  | -2.231250 |
| C    | 5.711413 | 1.148292  | -3.051894 |
| C    | 6.461549 | -0.003315 | -3.027828 |
| H    | 6.667650 | -1.979806 | -2.160478 |
| H    | 4.710906 | -1.791607 | -0.725252 |
| C    | 2.993867 | 0.363759  | -0.518914 |
| C    | 3.783013 | 2.464266  | -2.248875 |
| H    | 5.984927 | 1.975697  | -3.701540 |
| H    | 7.341260 | -0.100863 | -3.657292 |

|   |           |           |           |
|---|-----------|-----------|-----------|
| C | 2.647595  | 2.567509  | -1.488256 |
| C | 2.206380  | 1.512434  | -0.633201 |
| H | 4.092076  | 3.295071  | -2.878148 |
| H | 2.088545  | 3.490167  | -1.531762 |
| C | 2.782224  | -0.764064 | 0.454735  |
| C | 3.751446  | -0.905838 | 1.512072  |
| C | 1.843626  | -1.778600 | 0.249017  |
| C | 4.671467  | 0.128579  | 1.848035  |
| C | 3.821797  | -2.129480 | 2.255930  |
| C | 1.970195  | -3.004691 | 0.959751  |
| C | 5.584817  | -0.032913 | 2.865195  |
| H | 4.642325  | 1.061837  | 1.299043  |
| C | 4.784648  | -2.270924 | 3.291742  |
| C | 2.943810  | -3.184649 | 1.911945  |
| H | 1.291586  | -3.819379 | 0.744030  |
| C | 5.647682  | -1.244593 | 3.594994  |
| H | 6.267153  | 0.776189  | 3.109473  |
| H | 4.823307  | -3.208040 | 3.841120  |
| H | 3.032586  | -4.137978 | 2.426732  |
| H | 6.378514  | -1.359438 | 4.390160  |
| P | 0.610532  | 1.782920  | 0.307055  |
| P | 0.351066  | -1.495080 | -0.815385 |
| C | 0.012994  | 3.403549  | -0.397247 |
| C | -0.317710 | 3.492039  | -1.764221 |
| C | -0.164772 | 4.538601  | 0.405350  |
| C | -0.797596 | 4.680795  | -2.308499 |
| H | -0.195880 | 2.624224  | -2.404310 |
| C | -0.664365 | 5.727442  | -0.139635 |
| H | 0.085559  | 4.511096  | 1.459420  |
| C | -0.978427 | 5.804419  | -1.494226 |
| H | -1.034685 | 4.729995  | -3.367677 |
| H | -0.798967 | 6.592797  | 0.503008  |
| H | -1.358828 | 6.729837  | -1.916979 |
| C | 1.203197  | 2.336010  | 1.975316  |
| C | 0.390040  | 2.234067  | 3.114754  |
| C | 2.437277  | 2.998922  | 2.089627  |
| C | 0.799682  | 2.778487  | 4.333871  |
| H | -0.555577 | 1.708475  | 3.063064  |
| C | 2.847364  | 3.536983  | 3.309752  |
| H | 3.078664  | 3.112492  | 1.222090  |
| C | 2.029493  | 3.429672  | 4.435736  |
| H | 0.156803  | 2.685518  | 5.204667  |
| H | 3.805752  | 4.044094  | 3.376840  |
| H | 2.348407  | 3.850495  | 5.384993  |
| C | -0.463675 | -3.158627 | -0.940638 |
| C | -1.092771 | -3.712522 | 0.189733  |

|   |           |           |           |
|---|-----------|-----------|-----------|
| C | -0.488291 | -3.883074 | -2.142263 |
| C | -1.704777 | -4.963016 | 0.122305  |
| H | -1.109165 | -3.155460 | 1.120286  |
| C | -1.113563 | -5.131412 | -2.208778 |
| H | -0.022027 | -3.484325 | -3.034841 |
| C | -1.718445 | -5.677807 | -1.078548 |
| H | -2.173966 | -5.379444 | 1.009660  |
| H | -1.120194 | -5.674724 | -3.149470 |
| H | -2.197827 | -6.651264 | -1.130257 |
| C | 1.030028  | -1.268529 | -2.521566 |
| C | 2.134773  | -2.042791 | -2.916568 |
| C | 0.421659  | -0.433585 | -3.467981 |
| C | 2.619663  | -1.975923 | -4.222141 |
| H | 2.618436  | -2.702997 | -2.203582 |
| C | 0.907513  | -0.367992 | -4.775953 |
| H | -0.429285 | 0.173849  | -3.178171 |
| C | 2.007177  | -1.137702 | -5.156222 |
| H | 3.480007  | -2.574916 | -4.505783 |
| H | 0.424659  | 0.287198  | -5.495789 |
| H | 2.386025  | -1.084975 | -6.172896 |
| C | -5.658399 | -2.353628 | 1.675686  |
| C | -4.580441 | -2.056894 | 2.748401  |
| H | -6.507105 | -1.665309 | 1.767170  |
| H | -6.058039 | -3.368220 | 1.768863  |
| H | -4.932475 | -1.354959 | 3.509820  |
| H | -4.258961 | -2.970450 | 3.259359  |
| C | -4.925171 | -2.131705 | 0.376649  |
| C | -3.660034 | -1.551833 | 0.660134  |
| C | -5.279264 | -2.383048 | -0.924497 |
| H | -6.232005 | -2.844301 | -1.169859 |
| C | -4.363116 | -2.029338 | -1.940601 |
| H | -4.582833 | -2.213654 | -2.985992 |
| C | -3.185608 | -1.407515 | -1.592989 |
| H | -2.485120 | -1.079222 | -2.348175 |
| N | -2.817353 | -1.129200 | -0.305045 |
| N | -3.437811 | -1.474257 | 2.006612  |
| C | -2.177721 | -1.280043 | 2.624109  |
| C | -1.083774 | -0.727856 | 2.049979  |
| C | -1.953044 | -1.835490 | 4.023660  |
| H | -2.746495 | -1.579637 | 4.736280  |
| H | -1.885729 | -2.936578 | 4.011812  |
| C | -0.598584 | -1.200584 | 4.387630  |
| H | -0.771012 | -0.235432 | 4.881046  |
| H | -0.004384 | -1.818896 | 5.068385  |
| C | 0.073590  | -0.974994 | 3.018815  |
| H | 0.823714  | -0.183417 | 3.039760  |

|    |           |           |           |
|----|-----------|-----------|-----------|
| H  | 0.609246  | -1.886059 | 2.725008  |
| Ir | -1.119479 | 0.169072  | 0.063323  |
| H  | -1.214793 | 0.699237  | -1.496317 |
| C  | -2.594314 | 1.593878  | 1.140015  |
| H  | -1.979072 | 2.250512  | 1.741210  |
| C  | -2.825392 | 1.901706  | -0.192472 |
| H  | -2.260582 | 2.716504  | -0.622966 |
| H  | -3.300803 | 0.985765  | 1.694617  |
| C  | -4.091511 | 1.589210  | -0.947834 |
| H  | -3.865116 | 1.301706  | -1.980830 |
| H  | -4.638840 | 0.761555  | -0.487617 |
| C  | -4.993837 | 2.844359  | -0.967634 |
| H  | -5.228164 | 3.139193  | 0.064675  |
| H  | -4.441251 | 3.684948  | -1.410488 |
| C  | -6.298213 | 2.625534  | -1.747437 |
| H  | -6.057972 | 2.331148  | -2.778801 |
| H  | -6.846120 | 1.780467  | -1.307245 |
| C  | -7.196186 | 3.866894  | -1.763313 |
| H  | -8.117374 | 3.682846  | -2.326667 |
| H  | -7.480548 | 4.164015  | -0.746680 |
| H  | -6.686211 | 4.719501  | -2.227768 |

## 21-TS

B3LYP SCF energy: -3293.93885607 a.u.

B3LYP enthalpy: -3292.843868 a.u.

B3LYP free energy: -3292.999030 a.u.

B3LYP-D3(BJ) SCF energy in solution: -3295.15881311 a.u.

B3LYP-D3(BJ) enthalpy in solution: -3294.063825 a.u.

B3LYP-D3(BJ) free energy in solution: -3294.218987 a.u.

Imaginary frequency: -268.5506 cm<sup>-1</sup>

## Cartesian coordinates

| ATOM | X        | Y         | Z         |
|------|----------|-----------|-----------|
| C    | 5.952213 | 2.326253  | 1.170878  |
| C    | 4.898802 | 1.695165  | 0.547569  |
| C    | 4.186652 | 0.642294  | 1.190411  |
| C    | 4.610899 | 0.251231  | 2.500403  |
| C    | 5.703737 | 0.917484  | 3.116869  |
| C    | 6.362208 | 1.936423  | 2.468584  |
| H    | 6.476186 | 3.130242  | 0.661659  |
| H    | 4.599400 | 2.008424  | -0.446084 |
| C    | 3.068667 | -0.017920 | 0.568992  |
| C    | 3.943825 | -0.825167 | 3.131712  |
| H    | 6.010920 | 0.603901  | 4.111288  |

|   |           |           |           |
|---|-----------|-----------|-----------|
| H | 7.197717  | 2.440475  | 2.945675  |
| C | 2.859217  | -1.424723 | 2.540420  |
| C | 2.362533  | -0.998539 | 1.275863  |
| H | 4.303115  | -1.180796 | 4.094229  |
| H | 2.397787  | -2.262421 | 3.043988  |
| C | 2.824611  | 0.261258  | -0.888117 |
| C | 3.783277  | -0.302232 | -1.818273 |
| C | 1.752223  | 1.001464  | -1.376628 |
| C | 4.889441  | -1.093782 | -1.398317 |
| C | 3.624509  | -0.081613 | -3.224539 |
| C | 1.575598  | 1.136956  | -2.789411 |
| C | 5.791819  | -1.601498 | -2.308249 |
| H | 5.026507  | -1.306389 | -0.345674 |
| C | 4.574642  | -0.608688 | -4.137768 |
| C | 2.487698  | 0.634783  | -3.679603 |
| H | 0.705112  | 1.659992  | -3.168240 |
| C | 5.643856  | -1.351506 | -3.691501 |
| H | 6.626776  | -2.200852 | -1.956778 |
| H | 4.437615  | -0.416709 | -5.199095 |
| H | 2.343944  | 0.776532  | -4.748061 |
| H | 6.367933  | -1.750533 | -4.395919 |
| P | 0.807781  | -1.778423 | 0.569563  |
| P | 0.355005  | 1.646842  | -0.345723 |
| C | 0.152537  | -2.926452 | 1.877825  |
| C | 0.047244  | -2.563827 | 3.234936  |
| C | -0.437410 | -4.141251 | 1.478913  |
| C | -0.582612 | -3.400794 | 4.158940  |
| H | 0.457716  | -1.622456 | 3.585236  |
| C | -1.077826 | -4.970552 | 2.401829  |
| H | -0.379816 | -4.460660 | 0.443758  |
| C | -1.147046 | -4.608689 | 3.747498  |
| H | -0.626282 | -3.104780 | 5.203616  |
| H | -1.514617 | -5.906190 | 2.064379  |
| H | -1.634570 | -5.259897 | 4.466947  |
| C | 1.571221  | -2.975040 | -0.635773 |
| C | 1.582340  | -2.715431 | -2.013496 |
| C | 2.247463  | -4.115493 | -0.163999 |
| C | 2.209844  | -3.593781 | -2.901352 |
| H | 1.133578  | -1.809063 | -2.403507 |
| C | 2.873901  | -4.989809 | -1.050229 |
| H | 2.281991  | -4.328338 | 0.899546  |
| C | 2.848055  | -4.736957 | -2.424072 |
| H | 2.208228  | -3.371518 | -3.964367 |
| H | 3.385294  | -5.867722 | -0.665515 |
| H | 3.333242  | -5.421010 | -3.114348 |
| C | -0.031495 | 3.321487  | -1.049022 |

|   |           |           |           |
|---|-----------|-----------|-----------|
| C | -1.177027 | 3.963972  | -0.549879 |
| C | 0.807329  | 4.032824  | -1.921457 |
| C | -1.487938 | 5.268579  | -0.933625 |
| H | -1.821859 | 3.451746  | 0.156025  |
| C | 0.490405  | 5.337471  | -2.309460 |
| H | 1.718959  | 3.583217  | -2.298603 |
| C | -0.660065 | 5.957215  | -1.823006 |
| H | -2.374831 | 5.750651  | -0.531170 |
| H | 1.152658  | 5.869017  | -2.987155 |
| H | -0.903997 | 6.971956  | -2.124145 |
| C | 1.037845  | 2.224620  | 1.279680  |
| C | 1.949805  | 3.292631  | 1.328228  |
| C | 0.574457  | 1.682521  | 2.484733  |
| C | 2.395052  | 3.790126  | 2.551412  |
| H | 2.307771  | 3.748302  | 0.410738  |
| C | 1.014459  | 2.186125  | 3.710876  |
| H | -0.135368 | 0.866069  | 2.468324  |
| C | 1.927018  | 3.240103  | 3.747118  |
| H | 3.105313  | 4.611660  | 2.569827  |
| H | 0.638060  | 1.756405  | 4.635340  |
| H | 2.268143  | 3.635802  | 4.699570  |
| C | -5.270712 | 2.583353  | 2.206636  |
| C | -5.237404 | 2.634716  | 0.664776  |
| H | -6.275406 | 2.385192  | 2.589956  |
| H | -4.936017 | 3.535215  | 2.639274  |
| H | -6.075175 | 2.073755  | 0.229921  |
| H | -5.266651 | 3.652233  | 0.270579  |
| C | -4.284348 | 1.486622  | 2.519536  |
| C | -3.506920 | 1.235184  | 1.355983  |
| C | -4.047464 | 0.775064  | 3.667216  |
| H | -4.634723 | 0.940818  | 4.565983  |
| C | -3.023484 | -0.196013 | 3.632984  |
| H | -2.804456 | -0.821624 | 4.490771  |
| C | -2.289443 | -0.354691 | 2.479136  |
| H | -1.513100 | -1.099427 | 2.424937  |
| N | -2.476321 | 0.364830  | 1.333343  |
| N | -3.962014 | 1.975226  | 0.298307  |
| C | -3.585374 | 1.808069  | -1.044353 |
| C | -2.579685 | 1.033173  | -1.499887 |
| C | -4.243032 | 2.654790  | -2.117171 |
| H | -5.338229 | 2.662593  | -2.066531 |
| H | -3.911091 | 3.701846  | -2.040787 |
| C | -3.724860 | 1.993737  | -3.410514 |
| H | -4.442879 | 1.235861  | -3.744665 |
| H | -3.593639 | 2.708533  | -4.228401 |
| C | -2.405544 | 1.306399  | -2.992623 |

|    |           |           |           |
|----|-----------|-----------|-----------|
| H  | -2.201011 | 0.417190  | -3.598998 |
| H  | -1.553005 | 1.985318  | -3.146720 |
| Ir | -1.316087 | -0.145197 | -0.415241 |
| H  | -0.804526 | -0.818030 | -1.943600 |
| C  | -1.672222 | -1.830200 | -1.972390 |
| H  | -0.922058 | -2.602782 | -2.131365 |
| C  | -2.494499 | -1.923658 | -0.767798 |
| H  | -2.169727 | -2.692195 | -0.062872 |
| H  | -2.192025 | -1.551267 | -2.888994 |
| C  | -4.008197 | -1.841355 | -0.861162 |
| H  | -4.412463 | -1.541101 | 0.115392  |
| H  | -4.297876 | -1.058117 | -1.570919 |
| C  | -4.653655 | -3.179820 | -1.270329 |
| H  | -4.267130 | -3.486997 | -2.253638 |
| H  | -4.346781 | -3.964122 | -0.562643 |
| C  | -6.186151 | -3.117874 | -1.323766 |
| H  | -6.567851 | -2.803536 | -0.341713 |
| H  | -6.491705 | -2.336948 | -2.034693 |
| C  | -6.830761 | -4.450467 | -1.719233 |
| H  | -7.923111 | -4.371624 | -1.745596 |
| H  | -6.496744 | -4.774670 | -2.712372 |
| H  | -6.571370 | -5.243325 | -1.007082 |

## 22

B3LYP SCF energy: -3293.93718115 a.u.

B3LYP enthalpy: -3292.838701 a.u.

B3LYP free energy: -3292.997376 a.u.

B3LYP-D3(BJ) SCF energy in solution: -3295.16798394 a.u.

B3LYP-D3(BJ) enthalpy in solution: -3294.069504 a.u.

B3LYP-D3(BJ) free energy in solution: -3294.228179 a.u.

### Cartesian coordinates

| ATOM | X         | Y         | Z         |
|------|-----------|-----------|-----------|
| C    | -6.130478 | -1.640157 | 1.565621  |
| C    | -5.041683 | -1.188888 | 0.853445  |
| C    | -4.183364 | -0.180763 | 1.379456  |
| C    | -4.496862 | 0.355693  | 2.669466  |
| C    | -5.627605 | -0.128581 | 3.380260  |
| C    | -6.430188 | -1.107472 | 2.842518  |
| H    | -6.768170 | -2.411499 | 1.143012  |
| H    | -4.829364 | -1.610335 | -0.122317 |
| C    | -3.030532 | 0.299220  | 0.662913  |
| C    | -3.681177 | 1.388816  | 3.187925  |
| H    | -5.848202 | 0.294123  | 4.357123  |



|   |           |           |           |
|---|-----------|-----------|-----------|
| H | -7.294839 | -1.470402 | 3.390563  |
| C | -2.574209 | 1.824675  | 2.502272  |
| C | -2.199737 | 1.261630  | 1.248624  |
| H | -3.945137 | 1.845585  | 4.138591  |
| H | -1.997441 | 2.636416  | 2.923298  |
| C | -2.869814 | -0.154126 | -0.762446 |
| C | -3.779711 | 0.420884  | -1.727437 |
| C | -1.931409 | -1.099727 | -1.179340 |
| C | -4.759206 | 1.393573  | -1.375129 |
| C | -3.712657 | 0.016004  | -3.100377 |
| C | -1.852380 | -1.442046 | -2.564950 |
| C | -5.625265 | 1.907331  | -2.315354 |
| H | -4.826758 | 1.737182  | -0.350503 |
| C | -4.622550 | 0.558492  | -4.045684 |
| C | -2.718912 | -0.916336 | -3.488180 |
| H | -1.102790 | -2.149494 | -2.895320 |
| C | -5.565896 | 1.483890  | -3.663527 |
| H | -6.363911 | 2.645690  | -2.016673 |
| H | -4.557344 | 0.227580  | -5.079160 |
| H | -2.651351 | -1.215493 | -4.531325 |
| H | -6.261102 | 1.892399  | -4.391211 |
| P | -0.622844 | 1.816841  | 0.406694  |
| P | -0.579200 | -1.764822 | -0.097063 |
| C | 0.156391  | 3.062037  | 1.542257  |
| C | 0.375977  | 2.790335  | 2.907135  |
| C | 0.690471  | 4.251320  | 1.015591  |
| C | 1.074889  | 3.686373  | 3.717260  |
| H | -0.016026 | 1.882670  | 3.356405  |
| C | 1.398512  | 5.142046  | 1.826037  |
| H | 0.546600  | 4.497386  | -0.030067 |
| C | 1.590165  | 4.867181  | 3.179416  |
| H | 1.209791  | 3.461535  | 4.771750  |
| H | 1.794360  | 6.056116  | 1.392750  |
| H | 2.133132  | 5.565095  | 3.809901  |
| C | -1.280699 | 2.863689  | -0.967453 |
| C | -1.117464 | 2.474278  | -2.301748 |
| C | -2.014504 | 4.030404  | -0.687387 |
| C | -1.642411 | 3.246294  | -3.340652 |
| H | -0.597413 | 1.551960  | -2.538850 |
| C | -2.535648 | 4.802634  | -1.723559 |
| H | -2.171819 | 4.341972  | 0.340956  |
| C | -2.344732 | 4.415660  | -3.053288 |
| H | -1.505794 | 2.927877  | -4.369882 |
| H | -3.093277 | 5.705992  | -1.492957 |
| H | -2.750621 | 5.019910  | -3.859488 |
| C | -0.280749 | -3.495714 | -0.687688 |

|   |           |           |           |
|---|-----------|-----------|-----------|
| C | 0.940156  | -4.088103 | -0.325703 |
| C | -1.235223 | -4.281386 | -1.355334 |
| C | 1.204965  | -5.423454 | -0.634511 |
| H | 1.685553  | -3.509010 | 0.209002  |
| C | -0.964648 | -5.614150 | -1.671280 |
| H | -2.195402 | -3.860218 | -1.635094 |
| C | 0.256333  | -6.188610 | -1.314752 |
| H | 2.152780  | -5.866339 | -0.340639 |
| H | -1.714312 | -6.204315 | -2.190971 |
| H | 0.463729  | -7.226354 | -1.559554 |
| C | -1.284058 | -2.156019 | 1.569941  |
| C | -2.319343 | -3.093508 | 1.718246  |
| C | -0.702782 | -1.606931 | 2.720062  |
| C | -2.770188 | -3.455981 | 2.986004  |
| H | -2.771626 | -3.551673 | 0.844858  |
| C | -1.150461 | -1.974634 | 3.990939  |
| H | 0.107899  | -0.895064 | 2.624764  |
| C | -2.186614 | -2.898235 | 4.126284  |
| H | -3.576259 | -4.177430 | 3.083360  |
| H | -0.684531 | -1.542950 | 4.872656  |
| H | -2.534518 | -3.188338 | 5.113616  |
| C | 5.453432  | -2.657718 | 1.634341  |
| C | 5.254875  | -2.707901 | 0.102072  |
| H | 6.480588  | -2.399913 | 1.906433  |
| H | 5.226915  | -3.628776 | 2.092451  |
| H | 6.030316  | -2.136992 | -0.424266 |
| H | 5.250941  | -3.724916 | -0.295389 |
| C | 4.446723  | -1.621366 | 2.073469  |
| C | 3.563831  | -1.368789 | 0.986210  |
| C | 4.271486  | -0.972202 | 3.265676  |
| H | 4.935386  | -1.146090 | 4.107379  |
| C | 3.201646  | -0.051390 | 3.360492  |
| H | 3.022342  | 0.516944  | 4.265768  |
| C | 2.376049  | 0.133323  | 2.278246  |
| H | 1.571747  | 0.850123  | 2.306206  |
| N | 2.508029  | -0.528071 | 1.087018  |
| N | 3.939665  | -2.067679 | -0.119283 |
| C | 3.358524  | -1.940973 | -1.386691 |
| C | 2.259243  | -1.204908 | -1.643593 |
| C | 3.849418  | -2.751359 | -2.566546 |
| H | 4.936081  | -2.716713 | -2.711011 |
| H | 3.573194  | -3.812068 | -2.457574 |
| C | 3.083656  | -2.086257 | -3.732145 |
| H | 3.692826  | -1.277193 | -4.150518 |
| H | 2.852225  | -2.784295 | -4.542348 |
| C | 1.814382  | -1.486856 | -3.076877 |

|    |          |           |           |
|----|----------|-----------|-----------|
| H  | 1.446703 | -0.609308 | -3.619217 |
| H  | 1.004393 | -2.230141 | -3.077204 |
| Ir | 1.218225 | 0.002301  | -0.418193 |
| C  | 2.452854 | 1.828077  | -2.457454 |
| H  | 2.737656 | 2.847101  | -2.754118 |
| C  | 2.514271 | 1.656104  | -0.931534 |
| H  | 2.050711 | 2.537089  | -0.469938 |
| H  | 3.130897 | 1.129541  | -2.959868 |
| C  | 3.969543 | 1.617551  | -0.438066 |
| H  | 3.989841 | 1.524492  | 0.654551  |
| H  | 4.476137 | 0.729666  | -0.843056 |
| C  | 4.796467 | 2.866702  | -0.803304 |
| H  | 4.898351 | 2.948998  | -1.893345 |
| H  | 4.256067 | 3.767516  | -0.474977 |
| C  | 6.196886 | 2.864284  | -0.174361 |
| H  | 6.102880 | 2.798805  | 0.919390  |
| H  | 6.733061 | 1.957032  | -0.489490 |
| C  | 7.026505 | 4.098788  | -0.543266 |
| H  | 8.019222 | 4.067143  | -0.080433 |
| H  | 7.167213 | 4.171705  | -1.628528 |
| H  | 6.533893 | 5.020982  | -0.211313 |
| H  | 1.451131 | 1.665021  | -2.871254 |

### 23-TS

B3LYP SCF energy: -3293.92802464 a.u.

B3LYP enthalpy: -3292.830097 a.u.

B3LYP free energy: -3292.984014 a.u.

B3LYP-D3(BJ) SCF energy in solution: -3295.15110655 a.u.

B3LYP-D3(BJ) enthalpy in solution: -3294.053179 a.u.

B3LYP-D3(BJ) free energy in solution: -3294.207096 a.u.

Imaginary frequency: -322.9651 cm<sup>-1</sup>

### Cartesian coordinates

| ATOM | X         | Y         | Z         |
|------|-----------|-----------|-----------|
| C    | -6.099715 | 1.875584  | -1.617478 |
| C    | -5.031265 | 1.429389  | -0.871828 |
| C    | -4.152536 | 0.422863  | -1.368275 |
| C    | -4.411373 | -0.095104 | -2.678578 |
| C    | -5.522820 | 0.383200  | -3.423393 |
| C    | -6.355405 | 1.346984  | -2.905091 |
| H    | -6.754399 | 2.642041  | -1.212231 |
| H    | -4.856819 | 1.853545  | 0.109351  |
| C    | -3.029727 | -0.074365 | -0.611643 |
| C    | -3.549401 | -1.088873 | -3.198055 |

|   |           |           |           |
|---|-----------|-----------|-----------|
| H | -5.702005 | -0.030734 | -4.412473 |
| H | -7.205654 | 1.704777  | -3.478558 |
| C | -2.470792 | -1.535938 | -2.475478 |
| C | -2.180135 | -1.028704 | -1.177355 |
| H | -3.753105 | -1.504268 | -4.182062 |
| H | -1.845125 | -2.305140 | -2.906732 |
| C | -2.858689 | 0.450735  | 0.785550  |
| C | -3.834271 | 0.076478  | 1.776838  |
| C | -1.844289 | 1.351240  | 1.120778  |
| C | -4.857845 | -0.880637 | 1.520805  |
| C | -3.789302 | 0.675758  | 3.078115  |
| C | -1.826453 | 1.940352  | 2.416113  |
| C | -5.781444 | -1.209722 | 2.487189  |
| H | -4.899954 | -1.365699 | 0.553224  |
| C | -4.762594 | 0.322376  | 4.051072  |
| C | -2.774300 | 1.622621  | 3.357756  |
| H | -1.071702 | 2.675248  | 2.662439  |
| C | -5.742420 | -0.598861 | 3.763667  |
| H | -6.549212 | -1.946223 | 2.268000  |
| H | -4.716526 | 0.795860  | 5.028552  |
| H | -2.753776 | 2.102969  | 4.332987  |
| H | -6.484035 | -0.862270 | 4.512306  |
| P | -0.708871 | -1.705963 | -0.231643 |
| P | -0.446541 | 1.682854  | -0.059375 |
| C | -0.036960 | -3.006395 | -1.388024 |
| C | 0.538258  | -2.583993 | -2.603119 |
| C | 0.000328  | -4.373952 | -1.082000 |
| C | 1.103789  | -3.497919 | -3.490713 |
| H | 0.541054  | -1.527805 | -2.857756 |
| C | 0.578065  | -5.290318 | -1.966742 |
| H | -0.412604 | -4.738938 | -0.149194 |
| C | 1.126163  | -4.859101 | -3.173328 |
| H | 1.528869  | -3.146903 | -4.426969 |
| H | 0.595894  | -6.344511 | -1.704855 |
| H | 1.569154  | -5.573878 | -3.860815 |
| C | -1.634788 | -2.696359 | 1.039722  |
| C | -1.525456 | -2.426763 | 2.407607  |
| C | -2.546703 | -3.684279 | 0.619393  |
| C | -2.262653 | -3.159554 | 3.342113  |
| H | -0.884080 | -1.626563 | 2.745856  |
| C | -3.276245 | -4.419546 | 1.551424  |
| H | -2.689340 | -3.882131 | -0.438546 |
| C | -3.128158 | -4.165682 | 2.918114  |
| H | -2.163870 | -2.932887 | 4.399846  |
| H | -3.965239 | -5.186945 | 1.209545  |
| H | -3.697471 | -4.739608 | 3.643704  |

|   |           |           |           |
|---|-----------|-----------|-----------|
| C | 0.415214  | 3.186874  | 0.611714  |
| C | 1.140900  | 3.073137  | 1.812483  |
| C | 0.418475  | 4.423190  | -0.051820 |
| C | 1.806546  | 4.172621  | 2.353662  |
| H | 1.193359  | 2.115737  | 2.320023  |
| C | 1.101059  | 5.519330  | 0.483649  |
| H | -0.107279 | 4.543342  | -0.990980 |
| C | 1.787524  | 5.402520  | 1.691117  |
| H | 2.342758  | 4.066708  | 3.293049  |
| H | 1.087901  | 6.466733  | -0.047885 |
| H | 2.306243  | 6.259398  | 2.111775  |
| C | -1.280886 | 2.318992  | -1.584068 |
| C | -2.228449 | 3.353698  | -1.503692 |
| C | -0.964686 | 1.792200  | -2.843288 |
| C | -2.820081 | 3.863903  | -2.658971 |
| H | -2.506110 | 3.762221  | -0.536081 |
| C | -1.557964 | 2.300648  | -4.000043 |
| H | -0.274232 | 0.956995  | -2.916775 |
| C | -2.481500 | 3.342838  | -3.910110 |
| H | -3.550915 | 4.663618  | -2.580946 |
| H | -1.304892 | 1.876761  | -4.967830 |
| H | -2.944216 | 3.740614  | -4.808670 |
| C | 5.767402  | 2.614108  | 0.713694  |
| C | 5.321613  | 1.608364  | 1.804648  |
| H | 6.783343  | 2.407365  | 0.363757  |
| H | 5.759517  | 3.641747  | 1.095564  |
| H | 6.007088  | 0.755463  | 1.879580  |
| H | 5.250339  | 2.071641  | 2.791323  |
| C | 4.732150  | 2.437186  | -0.368963 |
| C | 3.713170  | 1.574335  | 0.109590  |
| C | 4.628174  | 2.971471  | -1.627226 |
| H | 5.392129  | 3.633282  | -2.025348 |
| C | 3.487086  | 2.638202  | -2.392492 |
| H | 3.347693  | 3.027607  | -3.394494 |
| C | 2.538645  | 1.798561  | -1.853848 |
| H | 1.661294  | 1.523161  | -2.420744 |
| N | 2.623563  | 1.240899  | -0.606217 |
| N | 3.989561  | 1.129253  | 1.368553  |
| C | 3.235813  | 0.230501  | 2.123129  |
| C | 2.194544  | -0.551869 | 1.695362  |
| C | 3.466065  | 0.165776  | 3.622638  |
| H | 4.525810  | 0.111875  | 3.898887  |
| H | 3.056999  | 1.057551  | 4.127308  |
| C | 2.692407  | -1.103993 | 4.013076  |
| H | 3.356025  | -1.974188 | 3.944097  |
| H | 2.295661  | -1.067937 | 5.032448  |

|    |          |           |           |
|----|----------|-----------|-----------|
| C  | 1.591320 | -1.199123 | 2.941292  |
| H  | 1.236850 | -2.218227 | 2.793747  |
| H  | 0.723614 | -0.600542 | 3.252690  |
| Ir | 1.062370 | -0.116230 | -0.014471 |
| C  | 2.542912 | -3.193725 | 0.855151  |
| H  | 1.501972 | -3.396542 | 1.109315  |
| C  | 2.736229 | -1.880846 | 0.106751  |
| H  | 2.223911 | -1.945138 | -0.862143 |
| H  | 2.878107 | -4.023826 | 0.222517  |
| C  | 4.208833 | -1.582230 | -0.179900 |
| H  | 4.303098 | -0.641038 | -0.725988 |
| H  | 4.765136 | -1.473841 | 0.759641  |
| C  | 4.894221 | -2.670075 | -1.037600 |
| H  | 4.940543 | -3.617254 | -0.485928 |
| H  | 4.293712 | -2.865034 | -1.938231 |
| C  | 6.317005 | -2.270276 | -1.455026 |
| H  | 6.277733 | -1.331082 | -2.025649 |
| H  | 6.911114 | -2.057222 | -0.554639 |
| C  | 7.022658 | -3.345519 | -2.287917 |
| H  | 8.033788 | -3.031345 | -2.569189 |
| H  | 7.109446 | -4.285757 | -1.730243 |
| H  | 6.470767 | -3.557512 | -3.211823 |
| H  | 3.134842 | -3.223883 | 1.776544  |

## 24

B3LYP SCF energy: -811.06436615 a.u.

B3LYP enthalpy: -810.633064 a.u.

B3LYP free energy: -810.704423 a.u.

B3LYP-D3(BJ) SCF energy in solution: -811.39782286 a.u.

B3LYP-D3(BJ) enthalpy in solution: -810.966521 a.u.

B3LYP-D3(BJ) free energy in solution: -811.037880 a.u.

### Cartesian coordinates

| ATOM | X         | Y         | Z         |
|------|-----------|-----------|-----------|
| C    | -1.662950 | -2.408994 | -0.915047 |
| C    | -0.673039 | -1.244161 | -1.177355 |
| H    | -1.225218 | -3.141791 | -0.223310 |
| H    | -1.917603 | -2.943712 | -1.835961 |
| H    | 0.367174  | -1.522186 | -0.990396 |
| H    | -0.746181 | -0.892190 | -2.217891 |
| C    | -2.833602 | -1.703591 | -0.272481 |
| C    | -2.426920 | -0.404188 | 0.107394  |
| C    | -4.119740 | -2.097676 | 0.032397  |
| H    | -4.485651 | -3.086325 | -0.236025 |

|   |           |           |           |
|---|-----------|-----------|-----------|
| C | -4.952159 | -1.179514 | 0.702342  |
| H | -5.974463 | -1.436535 | 0.960386  |
| C | -4.437885 | 0.069380  | 1.033445  |
| H | -5.059213 | 0.794279  | 1.557018  |
| N | -3.184982 | 0.479964  | 0.751997  |
| N | -1.105088 | -0.172726 | -0.253037 |
| C | -0.537465 | 1.124031  | -0.349870 |
| C | 0.704541  | 1.450686  | 0.054477  |
| C | -1.289230 | 2.299739  | -0.950296 |
| H | -1.826240 | 2.029237  | -1.868851 |
| H | -2.044992 | 2.663733  | -0.244290 |
| C | -0.160882 | 3.326737  | -1.197834 |
| H | 0.187992  | 3.242445  | -2.233939 |
| H | -0.484946 | 4.361586  | -1.047233 |
| C | 0.984334  | 2.914017  | -0.239356 |
| H | 1.975174  | 3.084113  | -0.680644 |
| H | 0.960993  | 3.499655  | 0.692512  |
| C | 1.684306  | 0.553253  | 0.772118  |
| H | 1.163716  | -0.390128 | 0.987091  |
| C | 2.101601  | 1.170558  | 2.123206  |
| H | 2.688251  | 2.086262  | 1.979157  |
| H | 1.220141  | 1.425111  | 2.721743  |
| C | 2.908082  | 0.225381  | -0.121434 |
| H | 2.542629  | -0.108296 | -1.103121 |
| H | 3.478411  | 1.146825  | -0.308474 |
| C | 3.850573  | -0.846240 | 0.445078  |
| H | 4.290114  | -0.501055 | 1.390574  |
| H | 3.269436  | -1.748383 | 0.690717  |
| C | 4.984235  | -1.223847 | -0.519048 |
| H | 4.552149  | -1.582162 | -1.464380 |
| H | 5.560082  | -0.322019 | -0.771566 |
| C | 5.928205  | -2.289552 | 0.048046  |
| H | 5.387096  | -3.215332 | 0.280109  |
| H | 6.724649  | -2.538463 | -0.662689 |
| H | 6.404051  | -1.944739 | 0.974427  |
| H | 2.710927  | 0.473293  | 2.707616  |

## 21L-TS

B3LYP SCF energy: -3293.93897868 a.u.

B3LYP enthalpy: -3292.844150 a.u.

B3LYP free energy: -3292.997754 a.u.

B3LYP-D3(BJ) SCF energy in solution: -3295.15939743 a.u.

B3LYP-D3(BJ) enthalpy in solution: -3294.064569 a.u.

B3LYP-D3(BJ) free energy in solution: -3294.218173 a.u.

Imaginary frequency: -289.3300 cm-1

Cartesian coordinates

| ATOM | X         | Y         | Z         |
|------|-----------|-----------|-----------|
| C    | -5.882006 | -2.622434 | -0.412329 |
| C    | -4.783071 | -1.814629 | -0.601772 |
| C    | -4.150966 | -1.158708 | 0.493692  |
| C    | -4.703121 | -1.363005 | 1.798662  |
| C    | -5.838962 | -2.200495 | 1.964065  |
| C    | -6.419656 | -2.819729 | 0.882186  |
| H    | -6.342456 | -3.113153 | -1.265211 |
| H    | -4.386759 | -1.679499 | -1.601205 |
| C    | -2.992653 | -0.318578 | 0.322031  |
| C    | -4.116436 | -0.684879 | 2.892182  |
| H    | -6.242188 | -2.338472 | 2.964052  |
| H    | -7.289396 | -3.456468 | 1.015723  |
| C    | -2.997038 | 0.091350  | 2.720008  |
| C    | -2.378482 | 0.249478  | 1.447448  |
| H    | -4.568335 | -0.774929 | 3.876915  |
| H    | -2.608765 | 0.623199  | 3.576339  |
| C    | -2.604414 | 0.026857  | -1.091271 |
| C    | -3.492536 | 0.921024  | -1.805885 |
| C    | -1.468618 | -0.462012 | -1.733090 |
| C    | -4.659411 | 1.483437  | -1.214752 |
| C    | -3.201040 | 1.279021  | -3.162159 |
| C    | -1.156472 | -0.017647 | -3.054799 |
| C    | -5.496322 | 2.311236  | -1.931562 |
| H    | -4.896681 | 1.260364  | -0.182208 |
| C    | -4.086363 | 2.126289  | -3.878734 |
| C    | -2.002843 | 0.802935  | -3.753229 |
| H    | -0.232681 | -0.340270 | -3.520677 |
| C    | -5.218400 | 2.630275  | -3.280353 |
| H    | -6.381109 | 2.721959  | -1.453616 |
| H    | -3.848899 | 2.371829  | -4.910901 |
| H    | -1.758834 | 1.102593  | -4.769623 |
| H    | -5.892749 | 3.275642  | -3.835760 |
| P    | -0.793922 | 1.247230  | 1.305218  |
| P    | -0.165733 | -1.461460 | -0.884077 |
| C    | -0.334162 | 1.831753  | 3.013093  |
| C    | -0.344197 | 1.011548  | 4.157668  |
| C    | 0.236754  | 3.113409  | 3.139095  |
| C    | 0.156749  | 1.466468  | 5.379612  |
| H    | -0.751165 | 0.007079  | 4.114715  |
| C    | 0.748240  | 3.562521  | 4.357659  |
| H    | 0.266544  | 3.783105  | 2.286256  |
| C    | 0.704934  | 2.744164  | 5.486667  |



|   |           |           |           |
|---|-----------|-----------|-----------|
| H | 0.112401  | 0.815963  | 6.248832  |
| H | 1.172827  | 4.560403  | 4.421679  |
| H | 1.092671  | 3.097887  | 6.437359  |
| C | -1.494599 | 2.809813  | 0.566173  |
| C | -1.321697 | 3.133175  | -0.786528 |
| C | -2.308241 | 3.643965  | 1.355357  |
| C | -1.907637 | 4.280955  | -1.327356 |
| H | -0.752775 | 2.478004  | -1.436834 |
| C | -2.892137 | 4.788149  | 0.815003  |
| H | -2.483217 | 3.405943  | 2.399613  |
| C | -2.685863 | 5.115591  | -0.527513 |
| H | -1.764055 | 4.509471  | -2.379351 |
| H | -3.510993 | 5.422168  | 1.443723  |
| H | -3.139240 | 6.008876  | -0.947484 |
| C | 0.469081  | -2.673547 | -2.140687 |
| C | 1.602022  | -3.418992 | -1.771350 |
| C | -0.177099 | -2.991279 | -3.345294 |
| C | 2.090310  | -4.431093 | -2.597680 |
| H | 2.100210  | -3.219055 | -0.828660 |
| C | 0.317554  | -4.001792 | -4.174237 |
| H | -1.074310 | -2.462169 | -3.646512 |
| C | 1.455117  | -4.720036 | -3.807558 |
| H | 2.964289  | -4.999745 | -2.291701 |
| H | -0.196156 | -4.229183 | -5.104178 |
| H | 1.837417  | -5.506115 | -4.452368 |
| C | -1.038703 | -2.711388 | 0.179601  |
| C | -1.912342 | -3.639058 | -0.413502 |
| C | -0.764045 | -2.832439 | 1.546109  |
| C | -2.501874 | -4.647261 | 0.345979  |
| H | -2.128870 | -3.584412 | -1.475335 |
| C | -1.349374 | -3.846876 | 2.307384  |
| H | -0.087936 | -2.138324 | 2.023365  |
| C | -2.220623 | -4.756550 | 1.709936  |
| H | -3.179461 | -5.350331 | -0.129734 |
| H | -1.118158 | -3.925191 | 3.366293  |
| H | -2.674416 | -5.548320 | 2.299152  |
| C | 5.524149  | -2.902962 | 1.853114  |
| C | 5.620123  | -2.264237 | 0.450949  |
| H | 6.412617  | -2.700887 | 2.457859  |
| H | 5.417601  | -3.993135 | 1.783270  |
| H | 6.346387  | -1.440541 | 0.432656  |
| H | 5.899680  | -2.980985 | -0.323401 |
| C | 4.269368  | -2.284429 | 2.416605  |
| C | 3.558700  | -1.650499 | 1.359239  |
| C | 3.759033  | -2.275720 | 3.688271  |
| H | 4.286331  | -2.749015 | 4.511708  |

|    |          |           |           |
|----|----------|-----------|-----------|
| C  | 2.526176 | -1.619596 | 3.892103  |
| H  | 2.076737 | -1.549136 | 4.875978  |
| C  | 1.888540 | -1.048435 | 2.814767  |
| H  | 0.959018 | -0.523771 | 2.948095  |
| N  | 2.356344 | -1.057618 | 1.531945  |
| N  | 4.264148 | -1.730718 | 0.190794  |
| C  | 3.931316 | -1.124793 | -1.029209 |
| C  | 2.831429 | -0.382985 | -1.272452 |
| C  | 4.758388 | -1.421821 | -2.266205 |
| H  | 5.837541 | -1.295966 | -2.118481 |
| H  | 4.599435 | -2.460117 | -2.597683 |
| C  | 4.184858 | -0.413964 | -3.283430 |
| H  | 4.776535 | 0.509012  | -3.253890 |
| H  | 4.209454 | -0.789280 | -4.310945 |
| C  | 2.752736 | -0.130617 | -2.776858 |
| H  | 2.404715 | 0.869914  | -3.048955 |
| H  | 2.043785 | -0.837523 | -3.231071 |
| Ir | 1.383050 | 0.192128  | 0.050806  |
| H  | 1.122655 | 1.545908  | -1.041602 |
| C  | 1.919063 | 2.469234  | -0.438789 |
| H  | 1.108315 | 3.134304  | -0.143145 |
| C  | 2.609468 | 1.829561  | 0.673766  |
| H  | 2.364719 | 2.163468  | 1.680797  |
| H  | 3.669310 | 1.618670  | 0.529099  |
| C  | 2.716886 | 3.036744  | -1.608278 |
| H  | 3.530290 | 2.353164  | -1.869011 |
| H  | 2.078509 | 3.148141  | -2.494095 |
| C  | 3.300928 | 4.411213  | -1.229651 |
| H  | 2.486949 | 5.087417  | -0.930163 |
| H  | 3.949767 | 4.298527  | -0.350187 |
| C  | 4.095588 | 5.052177  | -2.376014 |
| H  | 3.441523 | 5.163451  | -3.252125 |
| H  | 4.903264 | 4.372118  | -2.680872 |
| C  | 4.686596 | 6.415288  | -2.001284 |
| H  | 3.899471 | 7.127607  | -1.725825 |
| H  | 5.371629 | 6.330626  | -1.149093 |
| H  | 5.247317 | 6.846232  | -2.837602 |

## 22L

B3LYP SCF energy: -3293.97661190 a.u.

B3LYP enthalpy: -3292.877209 a.u.

B3LYP free energy: -3293.035040 a.u.

B3LYP-D3(BJ) SCF energy in solution: -3295.20009414 a.u.

B3LYP-D3(BJ) enthalpy in solution: -3294.100691 a.u.

B3LYP-D3(BJ) free energy in solution: -3294.258522 a.u.

Cartesian coordinates

| ATOM | X         | Y         | Z         |
|------|-----------|-----------|-----------|
| C    | -6.643696 | 0.405754  | 0.248258  |
| C    | -5.310473 | 0.234238  | 0.548557  |
| C    | -4.450886 | -0.522810 | -0.300921 |
| C    | -5.026206 | -1.097706 | -1.479414 |
| C    | -6.406267 | -0.909923 | -1.760168 |
| C    | -7.203241 | -0.173422 | -0.915690 |
| H    | -7.273684 | 0.988167  | 0.914563  |
| H    | -4.909367 | 0.685548  | 1.448065  |
| C    | -3.046645 | -0.709540 | -0.017685 |
| C    | -4.197047 | -1.853132 | -2.341817 |
| H    | -6.818926 | -1.360392 | -2.659144 |
| H    | -8.257616 | -0.035138 | -1.136500 |
| C    | -2.861659 | -2.007418 | -2.072771 |
| C    | -2.253935 | -1.428731 | -0.917482 |
| H    | -4.630235 | -2.312486 | -3.226630 |
| H    | -2.260304 | -2.595364 | -2.753654 |
| C    | -2.542246 | -0.150069 | 1.283715  |
| C    | -2.976486 | -0.795550 | 2.500435  |
| C    | -1.750651 | 0.999178  | 1.357207  |
| C    | -3.769437 | -1.979818 | 2.503486  |
| C    | -2.613306 | -0.239345 | 3.770962  |
| C    | -1.374144 | 1.508341  | 2.636017  |
| C    | -4.174915 | -2.566762 | 3.681446  |
| H    | -4.066826 | -2.422973 | 1.561380  |
| C    | -3.052101 | -0.863808 | 4.969462  |
| C    | -1.809026 | 0.925813  | 3.799313  |
| H    | -0.729021 | 2.375514  | 2.694413  |
| C    | -3.817935 | -2.005194 | 4.930168  |
| H    | -4.779125 | -3.468993 | 3.651830  |
| H    | -2.767586 | -0.420252 | 5.920247  |
| H    | -1.524855 | 1.348367  | 4.759944  |
| H    | -4.149034 | -2.476639 | 5.850784  |
| P    | -0.422679 | -1.747689 | -0.711668 |
| P    | -0.856218 | 1.712510  | -0.096978 |
| C    | 0.076882  | -2.282173 | -2.416512 |
| C    | 0.126955  | -1.302291 | -3.424260 |
| C    | 0.478041  | -3.588428 | -2.725198 |
| C    | 0.576216  | -1.618972 | -4.706437 |
| H    | -0.229337 | -0.296678 | -3.219851 |
| C    | 0.928421  | -3.903350 | -4.010722 |
| H    | 0.440881  | -4.365111 | -1.969279 |
| C    | 0.983912  | -2.922271 | -5.001350 |

|   |           |           |           |
|---|-----------|-----------|-----------|
| H | 0.597720  | -0.852427 | -5.476336 |
| H | 1.233337  | -4.921501 | -4.235254 |
| H | 1.333620  | -3.172387 | -5.998691 |
| C | -0.361116 | -3.317608 | 0.264842  |
| C | 0.871099  | -3.842835 | 0.693196  |
| C | -1.529180 | -4.050790 | 0.522815  |
| C | 0.928634  | -5.063957 | 1.364416  |
| H | 1.790019  | -3.303645 | 0.499830  |
| C | -1.469056 | -5.270291 | 1.200904  |
| H | -2.490596 | -3.679509 | 0.189509  |
| C | -0.242190 | -5.779666 | 1.624502  |
| H | 1.890431  | -5.453928 | 1.685304  |
| H | -2.385383 | -5.820962 | 1.393250  |
| H | -0.196291 | -6.728874 | 2.150531  |
| C | -0.597590 | 3.509639  | 0.319469  |
| C | 0.415014  | 4.208291  | -0.355690 |
| C | -1.485570 | 4.240819  | 1.128106  |
| C | 0.562627  | 5.588388  | -0.197219 |
| H | 1.079680  | 3.684094  | -1.031581 |
| C | -1.332303 | 5.617687  | 1.292169  |
| H | -2.307062 | 3.742481  | 1.631682  |
| C | -0.303472 | 6.296275  | 0.635734  |
| H | 1.351220  | 6.107458  | -0.735235 |
| H | -2.026999 | 6.161445  | 1.926321  |
| H | -0.189559 | 7.369274  | 0.760838  |
| C | -2.026447 | 2.007332  | -1.499810 |
| C | -3.361304 | 2.390576  | -1.309010 |
| C | -1.498219 | 2.029323  | -2.798853 |
| C | -4.157824 | 2.746317  | -2.396848 |
| H | -3.785335 | 2.412431  | -0.311033 |
| C | -2.292149 | 2.394582  | -3.888180 |
| H | -0.450491 | 1.788612  | -2.960797 |
| C | -3.627377 | 2.745890  | -3.689258 |
| H | -5.194213 | 3.026865  | -2.232365 |
| H | -1.865562 | 2.409224  | -4.887365 |
| H | -4.248931 | 3.028274  | -4.534089 |
| C | 4.230966  | 4.104127  | 1.341564  |
| C | 3.718538  | 3.062682  | 2.366470  |
| H | 5.292735  | 4.326176  | 1.480344  |
| H | 3.680800  | 5.048652  | 1.437217  |
| H | 4.546214  | 2.479861  | 2.788636  |
| H | 3.164806  | 3.517400  | 3.190248  |
| C | 3.921976  | 3.455618  | 0.014515  |
| C | 3.052624  | 2.360805  | 0.252792  |
| C | 4.276475  | 3.762716  | -1.274658 |
| H | 4.944209  | 4.590676  | -1.495263 |

|    |           |           |           |
|----|-----------|-----------|-----------|
| C  | 3.746753  | 2.965887  | -2.319560 |
| H  | 4.004383  | 3.155117  | -3.355289 |
| C  | 2.888279  | 1.934608  | -2.007963 |
| H  | 2.460647  | 1.308483  | -2.784015 |
| N  | 2.510209  | 1.624504  | -0.731100 |
| N  | 2.833582  | 2.167996  | 1.582923  |
| C  | 2.186842  | 1.058646  | 2.154536  |
| C  | 1.459934  | 0.111586  | 1.518482  |
| C  | 2.238321  | 0.865376  | 3.656354  |
| H  | 3.254837  | 0.937632  | 4.062054  |
| H  | 1.642832  | 1.634624  | 4.171028  |
| C  | 1.643921  | -0.550581 | 3.851006  |
| H  | 2.444872  | -1.255431 | 4.095147  |
| H  | 0.925435  | -0.581981 | 4.674597  |
| C  | 0.989518  | -0.942963 | 2.498200  |
| H  | 1.305283  | -1.942911 | 2.194355  |
| H  | -0.102933 | -0.975211 | 2.561537  |
| Ir | 1.084421  | 0.076316  | -0.458369 |
| C  | 3.942384  | -1.237631 | 0.035389  |
| H  | 3.645409  | -1.633402 | 1.016882  |
| C  | 2.731541  | -1.209139 | -0.903528 |
| H  | 2.415439  | -2.237878 | -1.100075 |
| H  | 3.054798  | -0.824730 | -1.887760 |
| C  | 5.105332  | -2.084971 | -0.511248 |
| H  | 4.756881  | -3.114520 | -0.683243 |
| H  | 5.403491  | -1.698103 | -1.497083 |
| C  | 6.329151  | -2.111914 | 0.414661  |
| H  | 6.683149  | -1.082420 | 0.577194  |
| H  | 6.029543  | -2.489465 | 1.404198  |
| C  | 7.487936  | -2.964413 | -0.119913 |
| H  | 7.784231  | -2.590838 | -1.110341 |
| H  | 7.136566  | -3.994189 | -0.276511 |
| C  | 8.707099  | -2.976323 | 0.808258  |
| H  | 9.103569  | -1.964106 | 0.955849  |
| H  | 8.450051  | -3.378111 | 1.796193  |
| H  | 9.514840  | -3.592957 | 0.398725  |
| H  | 4.306060  | -0.219200 | 0.224575  |

## 25-TS

B3LYP SCF energy: -3293.91407551 a.u.

B3LYP enthalpy: -3292.819370 a.u.

B3LYP free energy: -3292.974474 a.u.

B3LYP-D3(BJ) SCF energy in solution: -3295.13307224 a.u.

B3LYP-D3(BJ) enthalpy in solution: -3294.038367 a.u.

B3LYP-D3(BJ) free energy in solution: -3294.193471 a.u.

Imaginary frequency: -399.3275 cm<sup>-1</sup>

Cartesian coordinates

| ATOM | X         | Y         | Z         |
|------|-----------|-----------|-----------|
| C    | 6.615326  | 1.274316  | 0.167842  |
| C    | 5.354427  | 0.876594  | -0.218326 |
| C    | 4.483361  | 0.200093  | 0.685013  |
| C    | 4.958664  | -0.030137 | 2.015577  |
| C    | 6.269545  | 0.377539  | 2.381239  |
| C    | 7.085835  | 1.016386  | 1.477595  |
| H    | 7.256553  | 1.790088  | -0.541334 |
| H    | 5.018368  | 1.085689  | -1.226674 |
| C    | 3.154222  | -0.219173 | 0.312930  |
| C    | 4.092684  | -0.650397 | 2.945708  |
| H    | 6.610864  | 0.181855  | 3.394578  |
| H    | 8.085618  | 1.328541  | 1.765200  |
| C    | 2.813395  | -0.999518 | 2.593026  |
| C    | 2.313965  | -0.790224 | 1.274701  |
| H    | 4.447121  | -0.838341 | 3.956120  |
| H    | 2.182193  | -1.457924 | 3.341381  |
| C    | 2.743867  | -0.013787 | -1.114979 |
| C    | 3.390260  | -0.801530 | -2.139475 |
| C    | 1.781630  | 0.924208  | -1.479247 |
| C    | 4.354002  | -1.806034 | -1.842501 |
| C    | 3.057313  | -0.585246 | -3.515739 |
| C    | 1.427139  | 1.081126  | -2.852775 |
| C    | 4.965446  | -2.527804 | -2.844571 |
| H    | 4.612696  | -2.005087 | -0.809878 |
| C    | 3.708341  | -1.339896 | -4.526733 |
| C    | 2.061187  | 0.371974  | -3.838069 |
| H    | 0.626365  | 1.759400  | -3.124291 |
| C    | 4.648722  | -2.290613 | -4.201963 |
| H    | 5.699434  | -3.286707 | -2.588719 |
| H    | 3.445966  | -1.153034 | -5.565050 |
| H    | 1.790820  | 0.521530  | -4.880466 |
| H    | 5.143371  | -2.862193 | -4.981960 |
| P    | 0.557392  | -1.353067 | 0.906172  |
| P    | 0.636915  | 1.708981  | -0.259387 |
| C    | 0.059465  | -2.111701 | 2.537452  |
| C    | -0.371474 | -1.260841 | 3.572160  |
| C    | 0.055180  | -3.495444 | 2.770516  |
| C    | -0.775251 | -1.774827 | 4.804265  |
| H    | -0.397429 | -0.189812 | 3.411881  |
| C    | -0.359610 | -4.010504 | 4.002397  |
| H    | 0.367188  | -4.182486 | 1.993294  |

|   |           |           |           |
|---|-----------|-----------|-----------|
| C | -0.772982 | -3.155070 | 5.023383  |
| H | -1.096538 | -1.097198 | 5.590427  |
| H | -0.355202 | -5.085604 | 4.159652  |
| H | -1.092425 | -3.557539 | 5.980400  |
| C | 0.903011  | -2.846632 | -0.143371 |
| C | 0.076298  | -3.212958 | -1.214023 |
| C | 2.006110  | -3.664747 | 0.162676  |
| C | 0.338944  | -4.368918 | -1.953560 |
| H | -0.755270 | -2.577085 | -1.489050 |
| C | 2.263730  | -4.820797 | -0.573423 |
| H | 2.669476  | -3.401079 | 0.980456  |
| C | 1.429104  | -5.177589 | -1.634651 |
| H | -0.308161 | -4.631009 | -2.786330 |
| H | 3.120996  | -5.438472 | -0.320624 |
| H | 1.633209  | -6.074745 | -2.212233 |
| C | 0.332358  | 3.455311  | -0.828260 |
| C | -0.533392 | 4.231745  | -0.035076 |
| C | 1.033404  | 4.085687  | -1.865100 |
| C | -0.723168 | 5.585694  | -0.297479 |
| H | -1.057575 | 3.777270  | 0.800799  |
| C | 0.841075  | 5.446412  | -2.127078 |
| H | 1.744684  | 3.534139  | -2.468416 |
| C | -0.040452 | 6.197788  | -1.352764 |
| H | -1.398255 | 6.165179  | 0.325963  |
| H | 1.393051  | 5.915626  | -2.936718 |
| H | -0.186085 | 7.254232  | -1.558537 |
| C | 1.588252  | 2.265460  | 1.237674  |
| C | 2.773961  | 2.999549  | 1.069860  |
| C | 1.040410  | 2.154554  | 2.519236  |
| C | 3.403864  | 3.585433  | 2.165364  |
| H | 3.207393  | 3.120059  | 0.081855  |
| C | 1.664768  | 2.753773  | 3.616618  |
| H | 0.117084  | 1.606928  | 2.654722  |
| C | 2.848540  | 3.468592  | 3.442844  |
| H | 4.327141  | 4.138750  | 2.019685  |
| H | 1.221787  | 2.660855  | 4.604599  |
| H | 3.334987  | 3.936939  | 4.293765  |
| C | -4.916669 | -3.017826 | -2.352666 |
| C | -4.330866 | -1.809041 | -3.127859 |
| H | -4.721401 | -3.960860 | -2.872720 |
| H | -6.003854 | -2.931947 | -2.239902 |
| H | -3.676282 | -2.129784 | -3.945429 |
| H | -5.112383 | -1.174311 | -3.547208 |
| C | -4.221999 | -2.944547 | -1.016874 |
| C | -3.409195 | -1.795466 | -0.974731 |
| C | -4.315833 | -3.739872 | 0.105989  |

|    |           |           |           |
|----|-----------|-----------|-----------|
| H  | -4.941297 | -4.628115 | 0.119091  |
| C  | -3.601739 | -3.338658 | 1.246060  |
| H  | -3.655045 | -3.897893 | 2.173081  |
| C  | -2.796472 | -2.213431 | 1.182335  |
| H  | -2.237827 | -1.893970 | 2.045931  |
| N  | -2.632877 | -1.457604 | 0.064883  |
| N  | -3.538425 | -1.047763 | -2.127471 |
| C  | -3.249885 | 0.295654  | -2.258673 |
| C  | -2.612443 | 1.137825  | -1.368200 |
| C  | -3.640361 | 0.957917  | -3.567979 |
| H  | -3.454207 | 0.322187  | -4.440479 |
| H  | -4.716817 | 1.196027  | -3.571325 |
| C  | -2.787716 | 2.229826  | -3.556581 |
| H  | -1.815509 | 2.018545  | -4.018363 |
| H  | -3.244065 | 3.060519  | -4.103735 |
| C  | -2.608400 | 2.516051  | -2.059654 |
| H  | -1.720434 | 3.107453  | -1.865634 |
| H  | -3.461884 | 3.116337  | -1.701253 |
| Ir | -1.078817 | 0.143014  | -0.052039 |
| H  | -0.520757 | -0.478041 | -1.444433 |
| C  | -3.233316 | 1.559134  | 0.495271  |
| H  | -3.094954 | 2.613191  | 0.267959  |
| C  | -2.350982 | 1.079125  | 1.546271  |
| H  | -1.845731 | 1.871340  | 2.096470  |
| H  | -2.782976 | 0.334284  | 2.216616  |
| C  | -4.700161 | 1.160513  | 0.485263  |
| H  | -5.161828 | 1.435655  | -0.470819 |
| H  | -4.801325 | 0.075204  | 0.599068  |
| C  | -5.465818 | 1.856994  | 1.630950  |
| H  | -5.023367 | 1.572919  | 2.594264  |
| H  | -5.342726 | 2.946101  | 1.542494  |
| C  | -6.962827 | 1.515047  | 1.630832  |
| H  | -7.084475 | 0.425434  | 1.712930  |
| H  | -7.400786 | 1.800808  | 0.664071  |
| C  | -7.731346 | 2.203134  | 2.763986  |
| H  | -7.339253 | 1.909380  | 3.745163  |
| H  | -7.654742 | 3.294517  | 2.689116  |
| H  | -8.794790 | 1.941614  | 2.738005  |



## 8. References:

1. F. Mo, G. Dong, *Science* **2014**, *345*, 68.
2. P. Mizar, B. Myrboh, *Tetrahedron Lett.* **2006**, *47*, 7823.
3. G.-Z. Wang, J. Jiang, X.-S. Bu, J.-J. Dai, J. Xu, Y. Fu, H.-J. Xu, *Org. Lett.* **2015**, *17*, 3682.
4. W. D. Kerber, M. R. Gagné, *Org. Lett.* **2005**, *7*, 3379.
5. M. Schinkel, L. Wang, K. Bielefeld, L. Ackermann, *Org. Lett.* **2014**, *16*, 1876.
6. W. B. Reid, J. J. Spillane, S. B. Krause, D. A. Watson, *J. Am. Chem. Soc.* **2016**, *138*, 5539.
7. C. Hirschhäuser, J. Velcicky, D. Schlawe, E. Hessler, A. Majdalani, J.-M. Neudörfl, A. Prokop, T. Wieder, H.-G. Schmalz, *Chem.--Eur. J.* **2013**, *19*, 13017.
8. S. Z. Tasker, A. C. Gutierrez, T. F. Jamison, *Angew. Chem. Int. Ed.* **2014**, *53*, 1858.
9. L. A. Paquette, F. Pierre, C. E. Cottrell, *J. Am. Chem. Soc.* **1987**, *109*, 5731.
10. Nakamura, S.; Kaneeda, M.; Ishihara, K.; Yamamoto, H. *J. Am. Chem. Soc.* **2000**, *122*, 8120.
11. D. Xing, G. Dong, *J. Am. Chem. Soc.* **2017**, *139*, 13664.
12. U. P. Dhokte, P. M. Pathare, V. K. Mahindroo, H. C. Brown, *J. Org. Chem.* **1998**, *63*, 8276.
13. S. Ozaki, H. Yoshinaga, E. Matsui, M. Adachi, *J. Org. Chem.* **2001**, *66*, 2503.
14. a) B. S. Pilgrim, A. E. Gatland, C. T. McTernan, P. A. Procopiou, T. J. Donohoe, *Org. Lett.* **2013**, *15*, 6190; b) B. S. Pilgrim, A. E. Gatland, C. H. A. Esteves, C. T. McTernan, G. R. Jones, M. R. Tatton, P. A. Procopiou, T. J. Donohoe, *Org. Biomol. Chem.* **2016**, *14*, 1065.
15. a) A. D. Becke, *J. Chem. Phys.* **1993**, *98*, 5648; b) C. Lee, W. Yang, R. G. Parr, *Phys. Rev. B* **1988**, *37*, 785.
16. A. V. Marenich, C. J. Cramer, D. G. Truhlar, *J. Phys. Chem. B* **2009**, *113*, 6378.
17. a) S. Grimme, J. Antony, S. Ehrlich, H. Krieg, *J. Chem. Phys.* **2010**, *132*, 154104; b) S. Grimme, S. Ehrlich, L. Goerigk, *J. Comput. Chem.* **2011**, *32*, 1456.
18. X. Li, H. Wu, Y. Lang, G. Huang, *Catal. Sci. Technol.* **2018**, *8*, 2417.
